# Supplementary material for: Tandem synthesis of N-methylated tertiary amines via three-component coupling of carbonyl compounds, amines, and methanol
Source: Royal Society of Chemistry journal article supplement (doi:10.1039/d2cc03115a), 2022-01-01
Supplement: d2cc03115a1.pdf [file d2cc03115a1.pdf]

## Supporting Information

### Tandem synthesis of N-methylated tertiary amines *via* three components coupling of carbonyl compounds, amines, and methanol

Ishani Borthakur, Sameer Srivastava, Saloni Kumari and Sabuj Kundu\*

Department of Chemistry, Indian Institute of Technology Kanpur, Kanpur 208016, India

Email: [sabuj@iitk.ac.in](mailto:sabuj@iitk.ac.in)

### Table of Contents

| S. No | Contents                                                                            | Page number |
|-------|-------------------------------------------------------------------------------------|-------------|
| 1     | Experimental Section                                                                | S2          |
| 2     | Optimization of Reaction Parameters                                                 | S3-S4       |
| 3     | Reaction with Other Alcohols                                                        | S5          |
| 4     | Time Dependent Product Distribution Study                                           | S6          |
| 5     | Control Experiments                                                                 | S7-S10      |
| 6     | Kinetic Isotope Effect Study                                                        | S11         |
| 7     | Characterisation data of Final Products                                             | S12-S24     |
| 8     | References                                                                          | S25-S27     |
| 9     | Copies of $^1\text{H}$ and $^{13}\text{C}\{^1\text{H}\}$ NMR of the Tertiary Amines | S28-S74     |
| 10    | HRMS Spectra of the Newly Reported Compounds                                        | S75-S80     |

## 1. Experimental Section

**1.1. General Information.** Unless noted, all experiments were carried out under argon atmosphere using either standard Schlenk line technique or argon filled Glove box. Glass apparatus were oven dried prior to use. All the alcohols, iridium precursor and other commercially available reagents were purchased from Sigma-Aldrich, Alfa Aesar, SD-fine chemicals, Avra or Spectrochem. Products were purified by column chromatography using silica gel (100-200 mesh) with hexane/ethyl acetate as eluent, based on silica gel coated aluminium TLC plate.  $^1\text{H}$  and  $^{13}\text{C}\{^1\text{H}\}$  Spectra were recorded using  $\text{CDCl}_3$  and  $\text{DMSO}-d_6$  solvents in JEOL 400 MHz, 500 MHz, 101 MHz, and 126 MHz spectrometer respectively. All  $^1\text{H}$  and  $^{13}\text{C}\{^1\text{H}\}$  NMR experiments were reported in parts per million (ppm) units and were measured relative to the signals for residual chloroform (7.26 ppm for  $^1\text{H}$  and 77.16 ppm for  $^{13}\text{C}\{^1\text{H}\}$ ) and DMSO (2.50 ppm for  $^1\text{H}$  and 39.5 ppm for  $^{13}\text{C}\{^1\text{H}\}$ ) in the deuterated solvent, unless otherwise stated and coupling constants ( $J$ ) were reported in hertz (Hz).

### 1.2. General procedure

- (A) **Synthesis of Metal Complexes:** The metal complexes **1-8** were synthesized according to literature procedures.<sup>1</sup>
- (B) **Synthesis of N-methylated tertiary amine:** To a reaction tube equipped with a magnetic stir bar, amine (0.20 mmol), aldehyde (0.20 mmol), Cat. **1** (0.2 mol %), caesium carbonate (20 mol%), and 1.2 mL of dry methanol were added under argon atmosphere. The mixture was placed in a preheated oil bath at 100 °C for 16 h. Then, the reaction mixture was cooled to room temperature and the solvent was evaporated. The crude product was purified by column chromatography in EtOAc/hexane to afford corresponding amines **D1-D47**.
- (C) **Preparative Scale Synthesis:** In a reaction tube equipped with a magnetic stir bar, amine (5 mmol), aldehyde (5 mmol), Cat. **1** (0.2 mol %), caesium carbonate (20 mol%), and 5.0 mL of dry methanol were added under argon atmosphere. The mixture was placed in a preheated oil bath at 100 °C for 16 h. Then, the reaction mixture was cooled to room temperature and the solvent was evaporated. The crude product was purified by column chromatography in EtOAc/hexane to afford corresponding amines.

## 2. Optimization of Reaction Parameters<sup>a</sup>

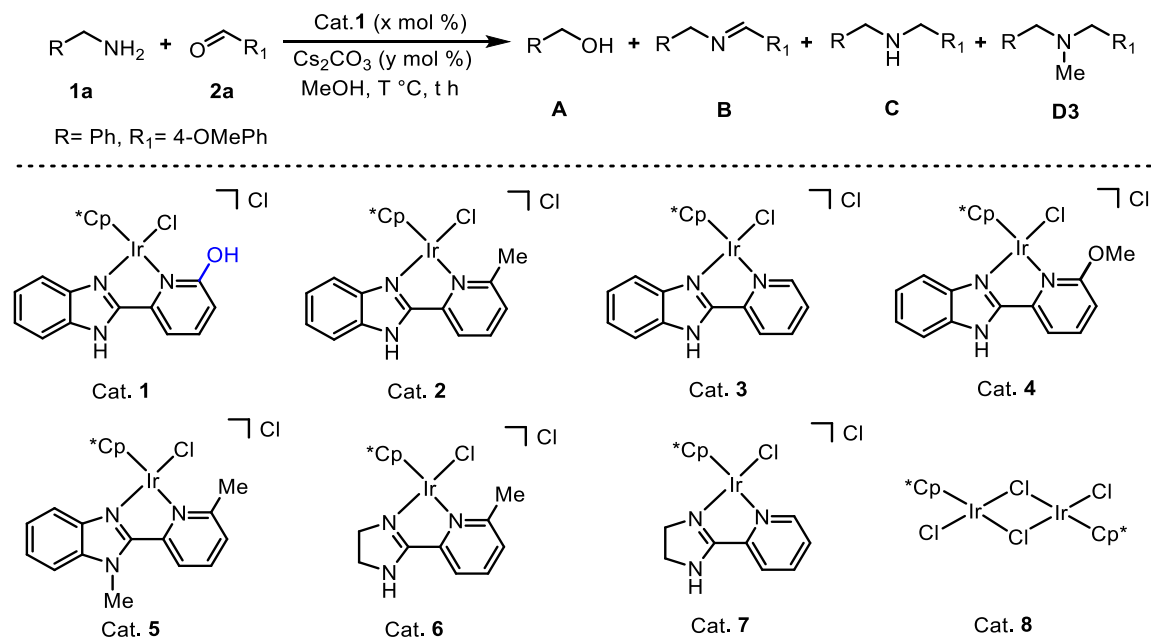

| Entry             | Catalyst (mol %)    | Base (mol %)                             | Yield (%) <sup>b</sup> |          |          |           |
|-------------------|---------------------|------------------------------------------|------------------------|----------|----------|-----------|
|                   |                     |                                          | A                      | B        | C        | D         |
| 1 <sup>c, d</sup> | Cat. 1 (0.1)        | Cs <sub>2</sub> CO <sub>3</sub> (10)     | 22                     | 0        | 0        | 78        |
| 2 <sup>d</sup>    | Cat. 1 (0.1)        | Cs <sub>2</sub> CO <sub>3</sub> (10)     | 9                      | 12       | 10       | 69        |
| 3 <sup>d</sup>    | Cat. 1 (0.2)        | Cs <sub>2</sub> CO <sub>3</sub> (10)     | 6                      | 5        | 12       | 77        |
| 4 <sup>d</sup>    | Cat. 1 (0.2)        | Cs <sub>2</sub> CO <sub>3</sub> (20)     | 3                      | 3        | 11       | 83        |
| <b>5</b>          | <b>Cat. 1 (0.2)</b> | <b>Cs<sub>2</sub>CO<sub>3</sub> (20)</b> | <b>3</b>               | <b>0</b> | <b>0</b> | <b>97</b> |
| 6                 | Cat. 2 (0.2)        | Cs <sub>2</sub> CO <sub>3</sub> (20)     | 7                      | 0        | 10       | 83        |
| 7                 | Cat. 3 (0.2)        | Cs <sub>2</sub> CO <sub>3</sub> (20)     | 8                      | 0        | 15       | 77        |
| 8                 | Cat. 4 (0.2)        | Cs <sub>2</sub> CO <sub>3</sub> (20)     | 6                      | 3        | 12       | 79        |
| 9                 | Cat. 5 (0.2)        | Cs <sub>2</sub> CO <sub>3</sub> (20)     | 11                     | 8        | 12       | 69        |
| 10                | Cat. 6 (0.2)        | Cs <sub>2</sub> CO <sub>3</sub> (20)     | 10                     | 5        | 9        | 76        |
| 11                | Cat. 7 (0.2)        | Cs <sub>2</sub> CO <sub>3</sub> (20)     | 9                      | 7        | 13       | 71        |

|                 |                                     |                                      |    |    |    |    |
|-----------------|-------------------------------------|--------------------------------------|----|----|----|----|
| 12              | Cat. <b>8</b> (0.1)                 | Cs <sub>2</sub> CO <sub>3</sub> (20) | 10 | 30 | 31 | 29 |
| 13              | IrCl <sub>3</sub> .H <sub>2</sub> O | Cs <sub>2</sub> CO <sub>3</sub> (20) | 11 | 62 | 27 | 0  |
| 14              | -                                   | Cs <sub>2</sub> CO <sub>3</sub> (20) | 0  | 88 | 0  | 0  |
| 15              | Cat. <b>1</b> (0.2)                 | K <sub>2</sub> CO <sub>3</sub> (20)  | 11 | 3  | 0  | 86 |
| 16              | Cat. <b>1</b> (0.2)                 | NaOH (20)                            | 12 | 7  | 0  | 81 |
| 17              | Cat. <b>1</b> (0.2)                 | KO <sup>t</sup> Bu (20)              | 15 | 6  | 0  | 79 |
| 18              | Cat. <b>1</b> (0.2)                 | CsOH.H <sub>2</sub> O (20)           | 9  | 7  | 0  | 84 |
| 19 <sup>e</sup> | Cat. <b>1</b> (0.2)                 | Cs <sub>2</sub> CO <sub>3</sub> (20) | 6  | 2  | 43 | 49 |

---

Reaction Condition: <sup>a</sup>Benzyl amine (**1a**, 0.1 mmol), 4-methoxy benzaldehyde (**2a**, 0.1 mmol), catalyst (x mol %), base (y mol %), MeOH (0.6 mL) at 100 °C for 16 h under Ar atmosphere.

<sup>b</sup>NMR yields with 1,3,5- trimethoxybenzene as an internal standard. <sup>c</sup>At 120 °C. <sup>d</sup>For 12 h. <sup>e</sup>At 90 °C.



### 3. Reaction with Other Alcohols<sup>a</sup>

The reaction of benzylamine **1a** (0.1 mmol) was performed with 4-methoxybenzaldehyde **2a** (0.1 mmol) under optimised reaction conditions with three different alcohols; isopropyl alcohol, *tert*-butanol and cyclohexanol but desired tertiary amine was not formed in any of the cases. However, in isopropanol formation of transfer hydrogenated product **C** was observed, while in *tert*-butanol and cyclohexanol, only N-benzyl-1-(4-methoxyphenyl)methanimine (**B**) formation took place. The results are tabulated below-

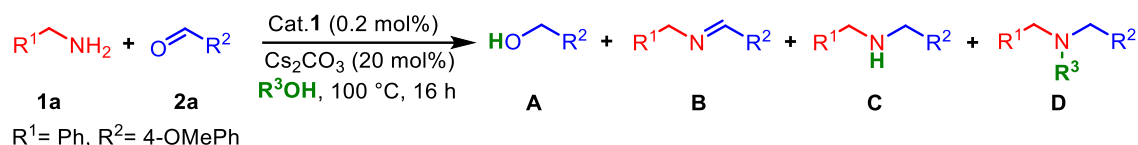

| Entry          | R <sup>3</sup> OH    | Yield (%) <sup>b</sup> |    |    |   |
|----------------|----------------------|------------------------|----|----|---|
|                |                      | A                      | B  | C  | D |
| 1              | isopropanol          | 12                     | -  | 88 | - |
| 2 <sup>c</sup> | <i>tert</i> -butanol | -                      | 75 | -  | - |
| 3 <sup>c</sup> | cyclohexanol         | -                      | 90 | -  | - |

Reaction Condition: <sup>a</sup>Benzyl amine (**1a**, 0.1 mmol), 4-methoxy benzaldehyde (**2a**, 0.1 mmol), catalyst (0.2 mol %), base (20 mol %), MeOH (0.6 mL) at 100 °C for 16 h under Ar atmosphere.

<sup>b</sup>NMR yields with 1,3,5- trimethoxybenzene as an internal standard. <sup>c</sup>Starting material was left.

Benzyl amine (**1a**, 0.2 mmol), 4-methoxybenzaldehyde (**2a**, 0.2 mmol), and Cat. **1** (0.2 mol %), Cs<sub>2</sub>CO<sub>3</sub> (20 mol %), and 1.2 mL of dry methanol were taken in oven dried reaction tubes under argon atmosphere. The tubes were then dipped in a preheated oil bath at 100 °C (oil bath temperature) and heated for specified times. The progress of the reactions was monitored by <sup>1</sup>H NMR using 1,3,5-trimethoxybenzene as the internal standard. All the reactions were repeated three times and the average data were plotted as conversion (%) vs time (h).

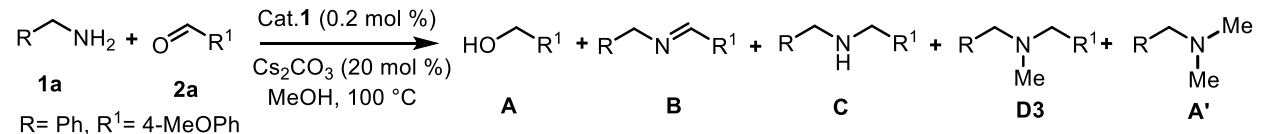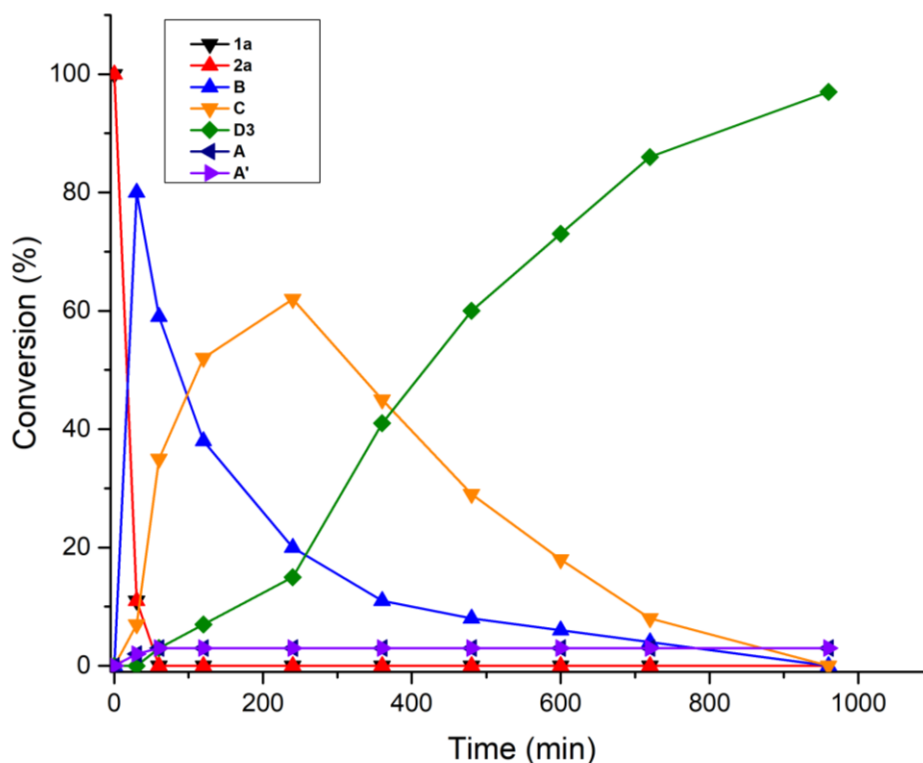

**Fig S1.** Plot For Time Dependent Product Distribution Studies.

## 5. Control experiments

### 5.1. Determination of Intermediates Formed

To a reaction tube equipped with a magnetic stir bar, N-benzyl-1-(4-methoxyphenyl) methanimine (**B**) or N-benzyl-1-(4-methoxyphenyl) methanamine (**C**) (0.2 mmol), Cat. **1** (0.2 mol %), caesium carbonate (20 mol%), and 1.2 mL of dry methanol were added under argon atmosphere. The mixture was placed in a preheated oil bath at 100 °C for 16 h. Then, the reaction mixture was cooled to room temperature and the solvent was evaporated. The yield of the product was calculated by <sup>1</sup>H NMR using 1,3,5-trimethoxybenzene as an internal standard. The results confirmed that these were the probable intermediates formed during the reaction.

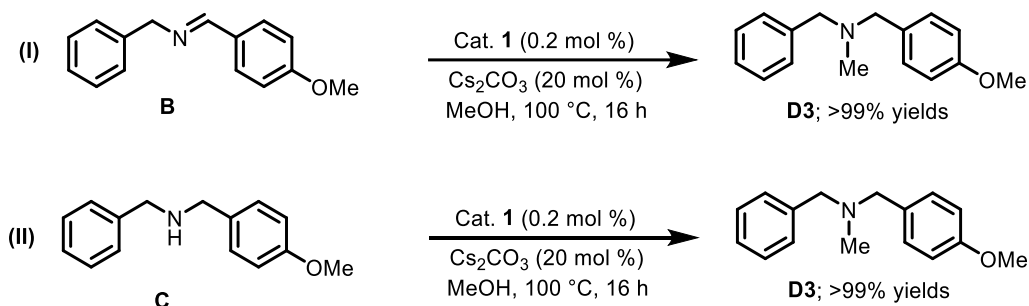

**Scheme S1** Determination of Intermediates Formed.

### 4.2 Deuterium Labelling Experiments

#### 4.2.1 Reaction with CD<sub>3</sub>OD

To a reaction tube equipped with a magnetic stir bar, benzylamine (**1a**, 0.20 mmol), 4-methoxy benzaldehyde (**2a**, 0.20 mmol), Cat. **1** (0.2 mol %), caesium carbonate (20 mol%), and 1.2 mL of CD<sub>3</sub>OD were added under argon atmosphere. The mixture was placed in a preheated oil bath at 100 °C for 36 h. Then, the reaction mixture was cooled to room temperature and the solvent was evaporated. The product was confirmed by <sup>1</sup>H NMR which produced only **D3-d<sub>3</sub>**.

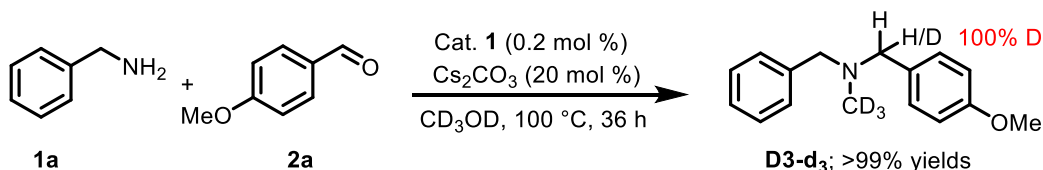

**Scheme S2** Reaction with CD<sub>3</sub>OD.

### 4.2.2 Competitive Reaction

To a reaction tube equipped with a magnetic stir bar, benzylamine (**1a**, 0.20 mmol), 4-methoxy benzaldehyde (**2a**, 0.20 mmol), Cat. **1** (0.2 mol %), caesium carbonate (20 mol%), and 1.2 mL of 1:1 mixture of CH<sub>3</sub>OH and CD<sub>3</sub>OD were added under argon atmosphere. The mixture was placed in a preheated oil bath at 100 °C for 16 h. The products were confirmed by <sup>1</sup>H NMR which primarily yielded (**D3**) compared to mixture of its D-labelled analogues.

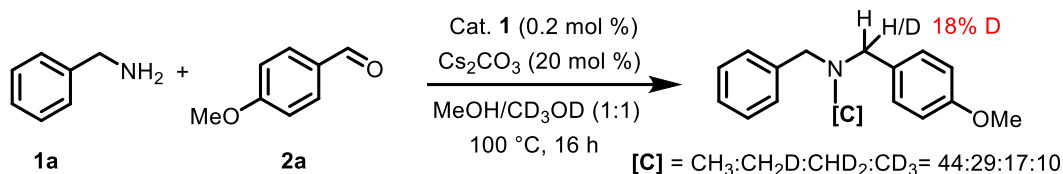

**Scheme S3** Competitive Reaction.

## 4.3 Determination of the Active Catalytic Species

### 4.3.1 General Procedure for the Synthesis of Ir-pyridonate Species (**I-1**)

In a round bottom flask, Cat. **1** (0.1 mmol), Cs<sub>2</sub>CO<sub>3</sub> (1.0 mmol, 10.0 equiv.), and MeOH (0.6 mL) were taken and stirred at room temperature for 30 min under an argon atmosphere. After that, the solvent was removed under vacuum, and then, dry dichloromethane was added to extract the Ir-pyridonate (**I-1**) complex. Next, the solution was filtered under an argon atmosphere, and the filtrate was dried under vacuum and washed with ether to afford (**I-1**) as a dark yellow powder. The compound formation was confirmed by <sup>13</sup>C{<sup>1</sup>H} NMR, IR spectrum which matched with the previously reported data.<sup>2</sup>

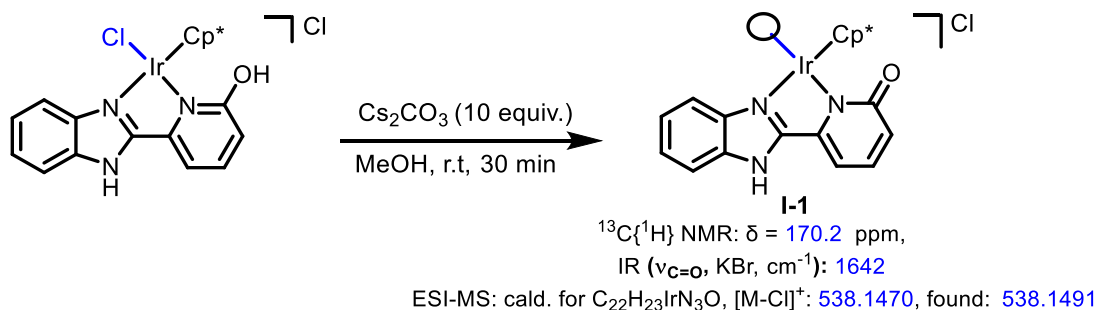

**Scheme S4** Synthesis of Ir-pyridonate Species (**I-1**).

# <sup>13</sup>C{<sup>1</sup>H}-NMR and IR Spectra of Ir-pyridonate (I-1)

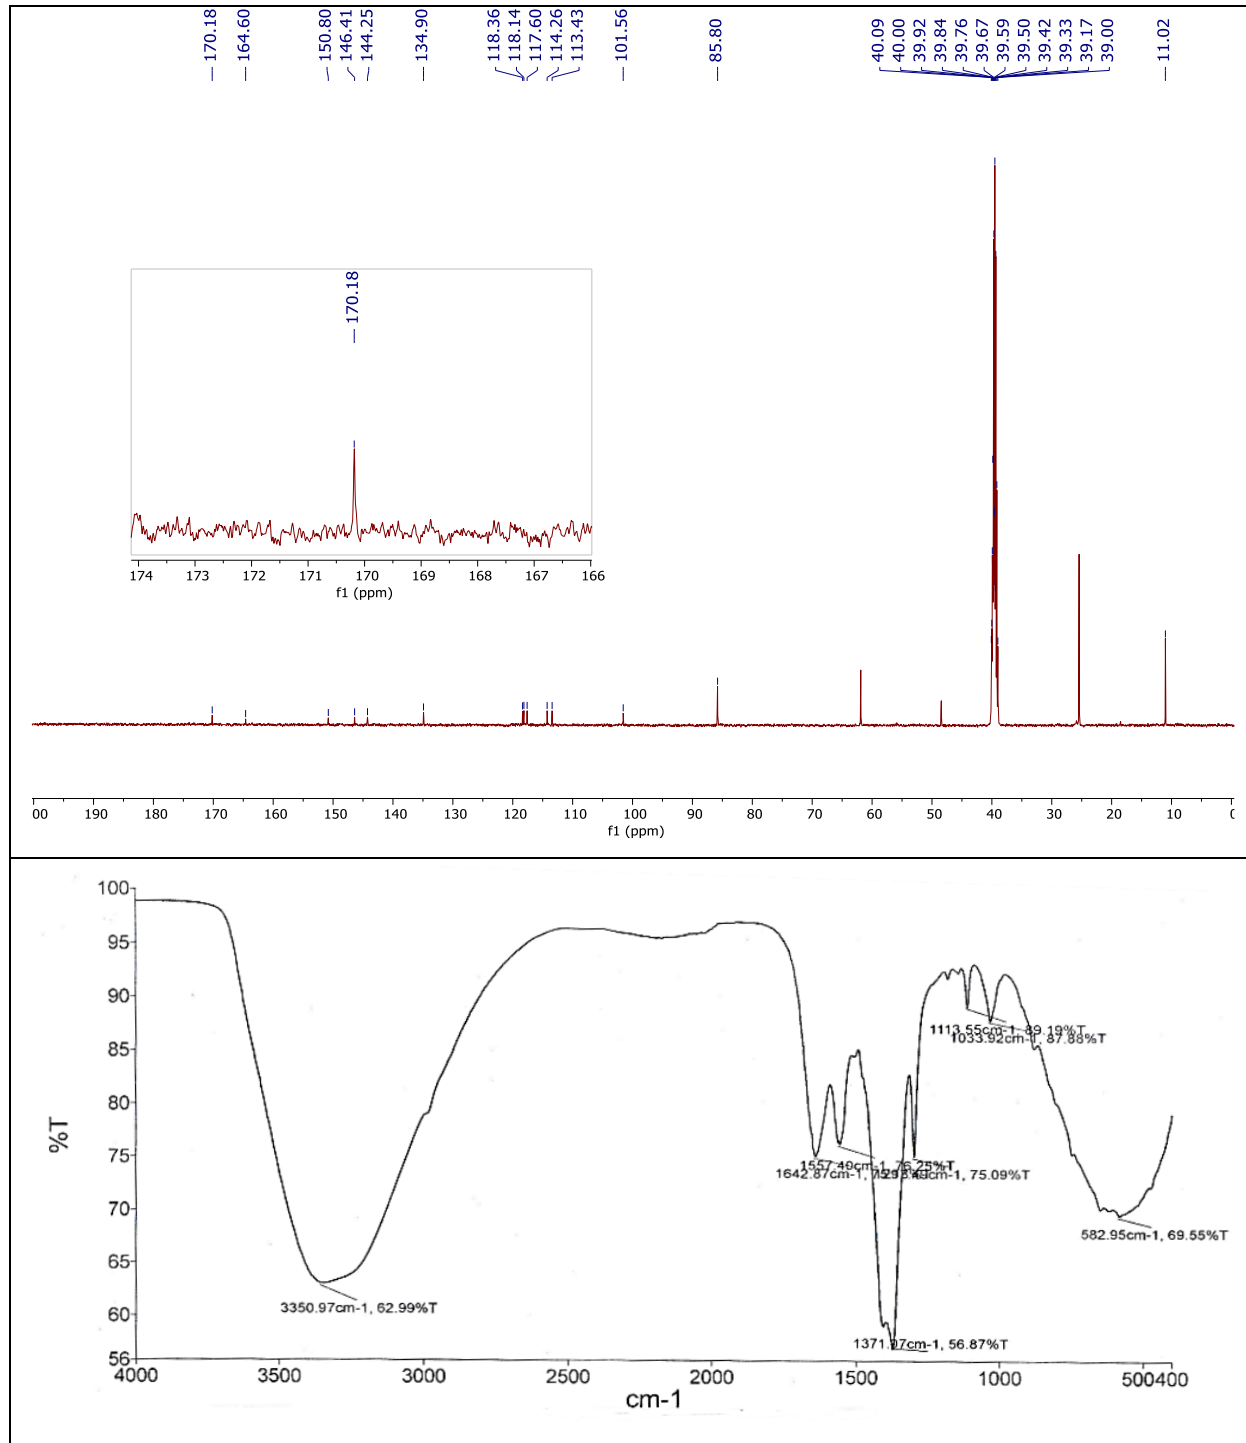

### 4.3.2 General Procedure for the Synthesis of Ir(III)-Hydride (I-2)

In a reaction tube, Cat. **1** (0.1 mmol), Cs<sub>2</sub>CO<sub>3</sub> (1.0 mmol, 10 equiv.), and MeOH (0.6 mL) were taken and heated at 100 °C for 1 h under an argon atmosphere. After that, the mixture was cooled to room temperature, the solvent was removed under vacuum, and then, dry dichloromethane was added to extract the Ir-hydride complex. Next, the solution was filtered under an argon atmosphere, and the filtrate was dried under vacuum to afford [Ir(III)-H] (**I-2**) as a yellow powder. The <sup>1</sup>H NMR spectrum was recorded in DMSO-d<sub>6</sub> which matched with the previously reported data.<sup>1,3</sup>

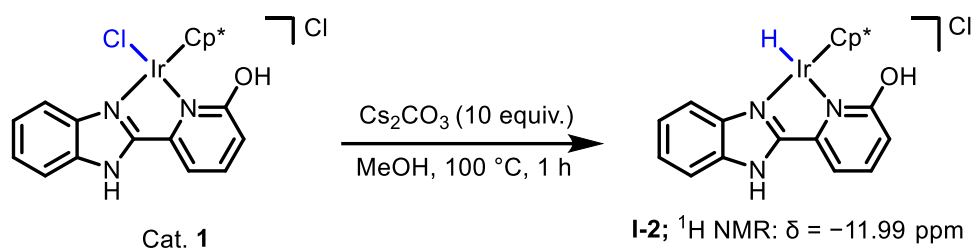

**Scheme S5** Synthesis of Ir(III)-Hydride (I-2).

### 4.3.3 General Procedure for the Reactivity Study of Ir-Hydride ([Ir-H])

In a reaction tube equipped with a magnetic stir bar, benzylamine (**1a**, 0.20 mmol), 4-methoxy benzaldehyde (**2a**, 0.20 mmol), **I-2** (0.2 mol %), caesium carbonate (20 mol%), and 1.0 mL of methanol were added under argon atmosphere. The mixture was placed in a preheated oil bath at 100 °C for 16 h. Then, the reaction mixture was cooled to room temperature and the solvent was evaporated. The yield of the product was determined by <sup>1</sup>H NMR with 1,3,5-trimethoxybenzene as an internal standard.

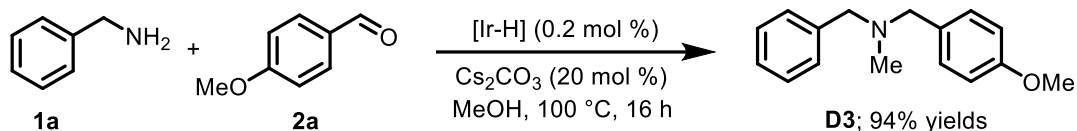

**Scheme S6** Reactivity Study of Ir-Hydride ([Ir-H]).

## 6. Kinetic Isotope Effect (KIE) Studies

Parallel reactions for the synthesis of N-benzyl-1-(4-methoxyphenyl)-N-methylmethanamine from benzylamine (**1a**) and 4-methoxy benzaldehyde (**2a**) were carried out using CH<sub>3</sub>OH and CD<sub>3</sub>OD under standard conditions for 30 min, 1, 2, 4, 6, 8, 12 and 16 hrs. All the tubes were placed in a preheated oil-baths at 100 °C and the progress of the reaction was analysed by <sup>1</sup>H NMR with 1,3,5-trimethoxybenzene as an internal standard. All the reactions were repeated thrice, and the average data were plotted as final product yields (%) vs time (h). For this tandem transformation, a kinetic isotope effect (KIE) study using CH<sub>3</sub>OH and CD<sub>3</sub>OD disclosed  $k_{C-H}/k_{C-D} = 2.77$ .

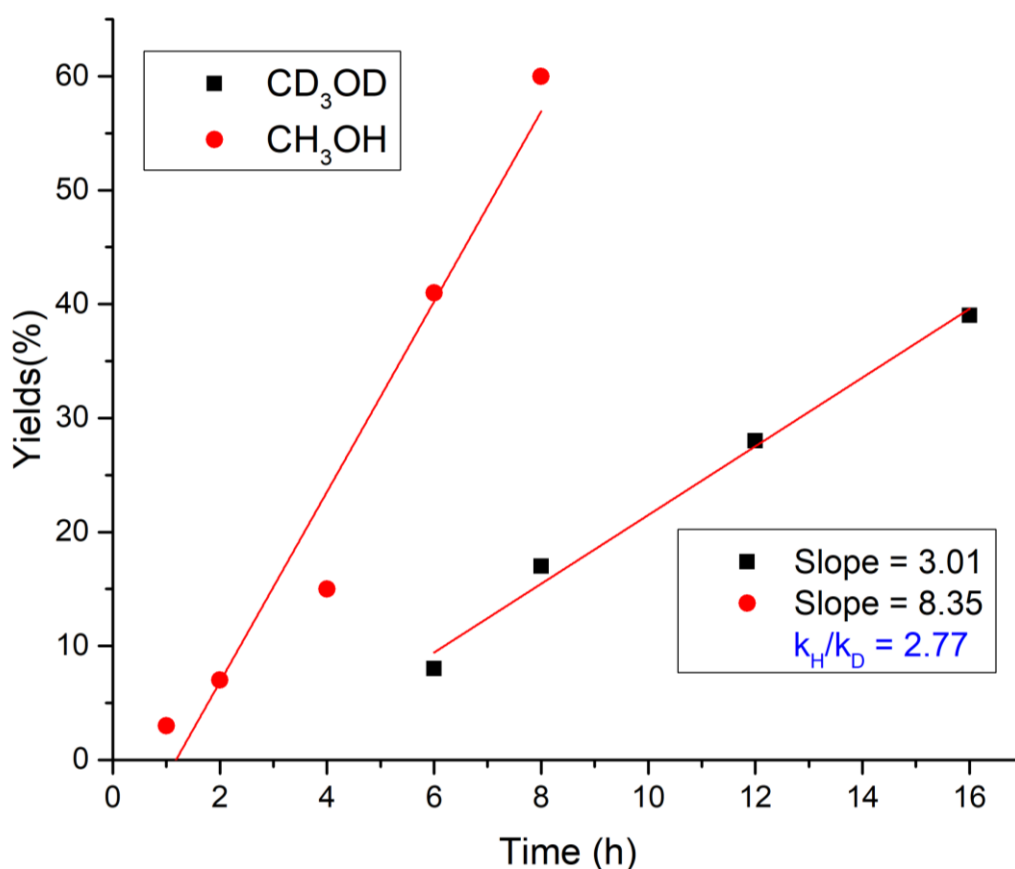

**Fig S2.** Plot For Kinetic Isotopic Effect.

## 7. Characterization Data of Final Products

### N-Benzyl-N-methyl-1-phenylmethanamine (D1)<sup>4</sup>

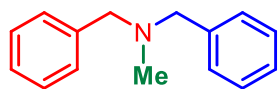

Purified by column chromatography on silica gel (ethyl acetate/hexane); Colorless oil; 91% yield (38.5 mg). <sup>1</sup>H NMR (500 MHz, CDCl<sub>3</sub>): δ = 7.39 (d, *J*<sub>H,H</sub> = 7.3 Hz, 4H), 7.35 (t, *J*<sub>H,H</sub> = 7.6 Hz, 4H), 7.26 (t, *J*<sub>H,H</sub> = 7.2 Hz, 2H), 3.54 (s, 4H), 2.20 (s, 3H). <sup>13</sup>C{<sup>1</sup>H} NMR (126 MHz, CDCl<sub>3</sub>): δ = 139.5, 129.0, 128.3, 127.0, 62.0, 42.4.

### N-Benzyl-N-methyl-1-(p-tolyl)methanamine (D2)<sup>5</sup>

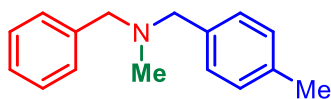

Purified by column chromatography on silica gel (ethyl acetate/hexane); Colorless oil; 92% yield (41.5 mg). <sup>1</sup>H NMR (500 MHz, CDCl<sub>3</sub>): δ = 7.37 (d, *J*<sub>H,H</sub> = 7.1 Hz, 2H), 7.32 (t, *J*<sub>H,H</sub> = 7.5 Hz, 2H), 7.26 (dd, *J*<sub>H,H</sub> = 7.9, 3.9 Hz, 3H), 7.14 (d, *J*<sub>H,H</sub> = 7.9 Hz, 2H), 3.51 (s, 2H), 3.50 (s, 2H), 2.34 (s, 3H), 2.18 (s, 3H). <sup>13</sup>C{<sup>1</sup>H} NMR (126 MHz, CDCl<sub>3</sub>): δ = 139.5, 136.6, 136.3, 129.1, 129.0, 128.3, 127.0, 61.9, 61.7, 42.3, 21.2.

### N-Benzyl-1-(4-methoxyphenyl)-N-methylmethanamine (D3)<sup>6</sup>

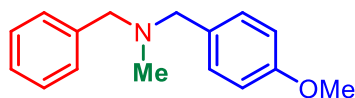

Purified by column chromatography on silica gel (ethyl acetate/hexane); Colorless oil; 93% yield (44.9 mg). <sup>1</sup>H NMR (500 MHz, CDCl<sub>3</sub>): δ = 7.38-7.25 (m, 7H), 6.89 (d, *J*<sub>H,H</sub> = 8.6 Hz, 2H), 3.81 (s, 3H), 3.52 (s, 2H), 3.49 (s, 2H), 2.19 (s, 3H). <sup>13</sup>C{<sup>1</sup>H} NMR (126 MHz, CDCl<sub>3</sub>): δ = 158.7, 139.5, 131.4, 130.2, 129.0, 128.3, 127.0, 113.7, 61.8, 61.3, 55.3, 42.2.

### N-Benzyl-N-methyl-1-(m-tolyl)methanamine (D4)<sup>7</sup>

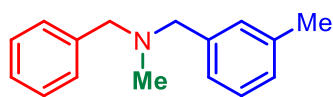

Purified by column chromatography on silica gel (ethyl acetate/hexane); Colorless oil; 91% yield (41.0 mg). <sup>1</sup>H NMR (500 MHz, CDCl<sub>3</sub>): δ = 7.39-7.32 (m, 4H), 7.28-7.17 (m, 4H), 7.08 (d, *J*<sub>H,H</sub> = 7.3 Hz, 1H), 3.54 (s, 2H), 3.51 (s, 2H), 2.37 (s, 3H), 2.20 (s, 3H). <sup>13</sup>C{<sup>1</sup>H} NMR (126 MHz, CDCl<sub>3</sub>): δ = 139.3, 137.9, 129.8, 129.1, 129.1, 128.3, 128.2, 127.8, 127.0, 126.2, 62.0, 42.4, 21.6.



**N-Benzyl-1-(3-methoxyphenyl)-N-methylmethanamine (D5)<sup>8</sup>**

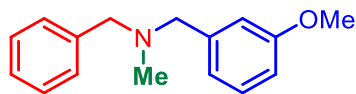

Purified by column chromatography on silica gel (ethyl acetate/hexane); Colorless oil; 90% yield (43.4 mg). **<sup>1</sup>H NMR** (500 MHz, CDCl<sub>3</sub>):  $\delta$  = 7.37 (d,  $J_{\text{H,H}}$  = 7.3 Hz, 2H), 7.32 (dd,  $J_{\text{H,H}}$  = 8.3, 6.6 Hz, 2H), 7.27-7.22 (m, 2H), 6.96-6.94 (m, 2H), 6.81-6.78 (m, 1H), 3.82 (s, 3H), 3.52 (s, 2H), 3.51 (s, 2H), 2.20 (s, 3H). **<sup>13</sup>C{<sup>1</sup>H} NMR** (126 MHz, CDCl<sub>3</sub>):  $\delta$  = 159.8, 141.2, 139.5, 129.3, 129.0, 128.3, 127.1, 121.4, 114.4, 112.5, 62.0, 55.3, 42.4.

**N-Benzyl-1-(3-methoxyphenyl)-N-methylmethanamine (D6)<sup>9</sup>**

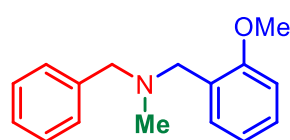

Purified by column chromatography on silica gel (ethyl acetate/hexane); Colorless oil; 87% yield (42.0 mg). **<sup>1</sup>H NMR** (500 MHz, CDCl<sub>3</sub>)  $\delta$  7.52 (dd,  $J_{\text{H,H}}$  = 7.5, 1.8 Hz, 1H), 7.45 (d,  $J_{\text{H,H}}$  = 7.1 Hz, 2H), 7.37 (t,  $J_{\text{H,H}}$  = 7.6 Hz, 2H), 7.31-7.25 (m, 2H), 7.01 (t,  $J_{\text{H,H}}$  = 7.4 Hz, 1H), 6.91 (d,  $J_{\text{H,H}}$  = 8.3 Hz, 1H), 3.85 (s, 3H), 3.64 (s, 2H), 3.63 (s, 2H), 2.28 (s, 3H). **<sup>13</sup>C{<sup>1</sup>H} NMR** (126 MHz, CDCl<sub>3</sub>):  $\delta$  = 158.0, 139.7, 130.5, 129.2, 128.3, 128.0, 127.4, 127.0, 120.5, 110.5, 62.4, 55.5, 55.3, 42.5.

**N-Benzyl-1-(3,4-dimethoxyphenyl)-N-methylmethanamine (D7)<sup>10</sup>**

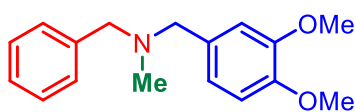

Purified by column chromatography on silica gel (ethyl acetate/hexane); Colorless oil; 95% yield (51.6 mg). **<sup>1</sup>H NMR** (500 MHz, CDCl<sub>3</sub>):  $\delta$  = 7.36-7.30 (m, 4H), 7.26-7.23 (m, 1H), 6.95 (d,  $J_{\text{H,H}}$  = 1.8 Hz, 1H), 6.87 (dd,  $J_{\text{H,H}}$  = 8.1, 2.0 Hz, 1H), 6.82 (d,  $J_{\text{H,H}}$  = 8.1 Hz, 1H), 3.90 (s, 3H), 3.87 (s, 3H), 3.50 (s, 2H), 3.48 (s, 2H), 2.19 (s, 3H). **<sup>13</sup>C{<sup>1</sup>H} NMR** (126 MHz, CDCl<sub>3</sub>):  $\delta$  = 149.0, 148.1, 139.4, 132.0, 129.0, 128.3, 127.0, 121.1, 112.0, 110.9, 61.8, 61.7, 56.0, 55.9, 42.4.

**N-Benzyl-N-methyl-1-(3,4,5-trimethoxyphenyl)methanamine (D8)**

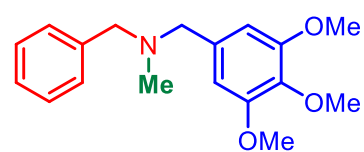

Purified by column chromatography on silica gel (ethyl acetate/hexane); Colorless oil; 93% yield (56.1 mg). **<sup>1</sup>H NMR** (500 MHz, CDCl<sub>3</sub>):  $\delta$  = 7.36 – 7.30 (m, 4H), 7.26 – 7.23 (m, 1H), 6.62 (s, 2H), 3.87 (s, 6H), 3.84 (s, 3H), 3.51 (s, 2H), 3.47 (s, 2H), 2.22 (s, 3H). **<sup>13</sup>C{<sup>1</sup>H} NMR** (126 MHz, CDCl<sub>3</sub>):  $\delta$  = 153.3, 139.4, 135.3, 129.0, 128.3, 127.1, 105.7, 62.3, 61.8, 61.0, 56.2, 42.6. **ESI-MS**: Calcd. for C<sub>18</sub>H<sub>24</sub>NO<sub>3</sub><sup>+</sup>, [M+H]<sup>+</sup>: 302.1751; found: 302.1759.

### N-Benzyl-1-(4-fluorophenyl)-N-methylmethanamine (D9)<sup>11</sup>

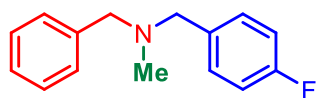

Purified by column chromatography on silica gel (ethyl acetate/hexane); Colorless oil; 89% yield (40.8 mg). **<sup>1</sup>H NMR** (500 MHz, CDCl<sub>3</sub>):  $\delta$  = 7.37 – 7.31 (m, 6H), 7.26 (t,  $J_{\text{H,H}}$  = 6.9 Hz, 1H), 7.01 (t,  $J_{\text{H,H}}$  = 8.7 Hz, 2H), 3.52 (s, 2H), 3.48 (s, 2H), 2.18 (s, 3H). **<sup>13</sup>C{<sup>1</sup>H} NMR** (126 MHz, CDCl<sub>3</sub>):  $\delta$  = 162.0 (d,  $J_{\text{C,F}}$  = 242.5 Hz), 139.3, 135.2, 130.4 (d,  $J_{\text{C,F}}$  = 7.5 Hz), 129.0 (d,  $J_{\text{C,F}}$  = 5.0 Hz), 128.3 (d,  $J_{\text{C,F}}$  = 5.0 Hz), 127.0 (d,  $J_{\text{C,F}}$  = 10.0 Hz), 115.1 (d,  $J_{\text{C,F}}$  = 21.2 Hz), 61.9, 61.1, 42.3.

### N-Benzyl-1-(4-bromophenyl)-N-methylmethanamine (D10)<sup>7</sup>

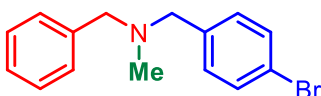

Purified by column chromatography on silica gel (ethyl acetate/hexane); Colorless oil; 90% yield (52.2 mg). **<sup>1</sup>H NMR** (400 MHz, CDCl<sub>3</sub>):  $\delta$  = 7.47 (d,  $J_{\text{H,H}}$  = 8.5 Hz, 2H), 7.39-7.33 (m, 4H), 7.29-7.26 (m, 3H), 3.54 (s, 2H), 3.49 (s, 2H), 2.20 (s, 3H). **<sup>13</sup>C{<sup>1</sup>H} NMR** (101 MHz, CDCl<sub>3</sub>):  $\delta$  = 139.2, 138.6, 131.4, 130.6, 129.0, 128.4, 127.1, 120.8, 62.0, 61.2, 42.3.

### N-Benzyl-1-(3-chlorophenyl)-N-methylmethanamine (D11)<sup>7</sup>

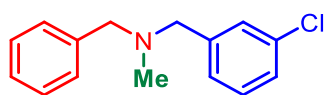

Purified by column chromatography on silica gel (ethyl acetate/hexane); Colorless oil; 85% yield (41.8 mg). **<sup>1</sup>H NMR** (500 MHz, CDCl<sub>3</sub>):  $\delta$  = 7.39-7.32 (m, 5H), 7.27-7.21 (m, 4H), 3.53 (s, 2H), 3.49 (s, 2H), 2.19 (s, 3H). **<sup>13</sup>C{<sup>1</sup>H} NMR** (126 MHz, CDCl<sub>3</sub>):  $\delta$  = 141.8, 139.2, 134.3, 129.6, 129.0, 129.0, 128.4, 127.2, 127.2, 127.1, 62.1, 61.3, 42.4.

### N-Benzyl-1-(2-chlorophenyl)-N-methylmethanamine (D12)<sup>12</sup>

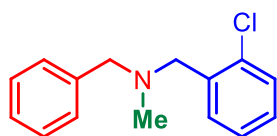

Purified by column chromatography on silica gel (ethyl acetate/hexane); Colorless oil; 80% yield (39.3 mg). **<sup>1</sup>H NMR** (400 MHz, CDCl<sub>3</sub>):  $\delta$  = 7.56 (dd,  $J_{\text{H,H}}$  = 7.6, 1.9 Hz, 1H), 7.41-7.29 (m, 5H), 7.24 (td,  $J_{\text{H,H}}$  = 7.0, 1.6 Hz, 2H), 7.17 (td,  $J_{\text{H,H}}$  = 7.6, 1.8 Hz, 1H), 3.65 (s, 2H), 3.59 (s, 2H), 2.21 (s, 3H). **<sup>13</sup>C{<sup>1</sup>H} NMR** (101 MHz, CDCl<sub>3</sub>):  $\delta$  = 139.4, 137.1, 134.4, 130.8, 129.5, 129.0, 128.4, 128.1, 127.1, 126.7, 62.4, 58.6, 42.4.

**N-Benzyl-1-(4-cyanophenyl)-N-methylmethanamine (D13)**<sup>13</sup>

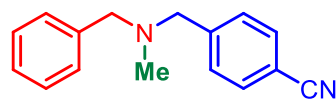

Purified by column chromatography on silica gel (ethyl acetate/hexane); Colorless oil; 87% yield (41.1 mg). <sup>1</sup>H NMR (500 MHz, CDCl<sub>3</sub>): δ = 7.62-7.59 (m, 2H), 7.49 (d, *J*<sub>H,H</sub> = 8.0 Hz, 2H), 7.37-7.31 (m, 4H), 7.29-7.25 (m, 1H), 3.56 (s, 2H), 3.55 (s, 2H), 2.19 (s, 3H). <sup>13</sup>C{<sup>1</sup>H} NMR (126 MHz, CDCl<sub>3</sub>): δ = 145.5, 138.9, 132.2, 129.4, 128.9, 128.5, 127.3, 119.1, 110.8, 62.2, 61.3, 42.5.

**N-Benzyl-N-methyl-1-(4-(trifluoromethyl)phenyl)methanamine (D14)**<sup>10</sup>

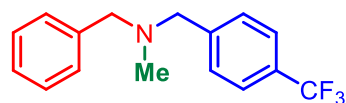

Purified by column chromatography on silica gel (ethyl acetate/hexane); Colorless oil; 86% yield (48.0 mg). <sup>1</sup>H NMR (500 MHz, CDCl<sub>3</sub>) δ 7.58 (d, *J*<sub>H,H</sub> = 8.1 Hz, 2H), 7.50 (d, *J*<sub>H,H</sub> = 7.9 Hz, 2H), 7.39 – 7.32 (m, 4H), 7.28 – 7.25 (m, 1H), 3.57 (s, 2H), 3.55 (s, 2H), 2.20 (s, 3H). <sup>13</sup>C{<sup>1</sup>H} NMR (126 MHz, CDCl<sub>3</sub>) δ = 143.8, 139.1, 129.4 (q, *J*<sub>C-F</sub> = 32 Hz), 129.1, 129.0, 128.5, 127.2, 125.3 (q, *J*<sub>C-F</sub> = 4.0 Hz), 124.4 (q, *J*<sub>C-F</sub> = 271 Hz), 62.1, 61.4, 42.4.

**N-Benzyl-1-(2-chlorophenyl)-N-methylmethanamine (D15)**<sup>14</sup>

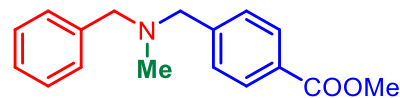

Purified by column chromatography on silica gel (ethyl acetate/hexane); Colorless oil; 86% yield (46.3 mg). <sup>1</sup>H NMR (500 MHz, CDCl<sub>3</sub>): δ = 8.01 (d, *J*<sub>H,H</sub> = 8.0 Hz, 2H), 7.45 (d, *J*<sub>H,H</sub> = 8.1 Hz, 2H), 7.35 (dt, *J*<sub>H,H</sub> = 14.9, 7.4 Hz, 4H), 7.27-7.24 (m, 1H), 3.91 (s, 3H), 3.56 (s, 2H), 3.54 (s, 2H), 2.19 (s, 3H). <sup>13</sup>C{<sup>1</sup>H} NMR (126 MHz, CDCl<sub>3</sub>): δ = 167.2, 145.1, 139.1, 129.7, 129.0, 128.8, 128.4, 127.2, 62.1, 61.6, 52.1, 42.4.

**N-Methyl-N-(4-methylbenzyl)-1-(p-tolyl)methanamine (D16)**<sup>15</sup>

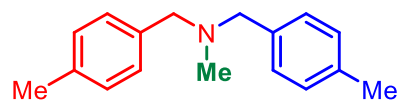

Purified by column chromatography on silica gel (ethyl acetate/hexane); Colorless oil; 96% yield (46.0 mg). <sup>1</sup>H NMR (500 MHz, CDCl<sub>3</sub>): δ = 7.27 (d, *J*<sub>H,H</sub> = 7.9 Hz, 4H), 7.15 (d, *J*<sub>H,H</sub> = 7.8 Hz, 4H), 3.50 (s, 4H), 2.36 (s, 6H), 2.19 (s, 3H). <sup>13</sup>C{<sup>1</sup>H} NMR (126 MHz, CDCl<sub>3</sub>): δ = 136.5, 136.4, 129.0, 61.6, 42.2, 21.2.

**N-(4-Methoxybenzyl)-1-(4-methoxyphenyl)-N-methylmethanamine (D17)**<sup>15</sup>

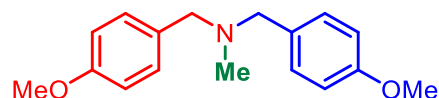

Purified by column chromatography on silica gel (ethyl acetate/hexane); Colorless oil; 97% yield (52.6 mg). <sup>1</sup>H NMR

(500 MHz, CDCl<sub>3</sub>):  $\delta$  = 7.28-7.26 (m, 4H), 6.87 (d,  $J_{\text{H,H}}$  = 8.7 Hz, 4H), 3.80 (s, 6H), 3.45 (s, 4H), 2.15 (d,  $J_{\text{H,H}}$  = 1.5 Hz, 3H). <sup>13</sup>C{<sup>1</sup>H} NMR (126 MHz, CDCl<sub>3</sub>):  $\delta$  = 158.7, 131.5, 130.2, 113.7, 61.1, 55.3, 42.1.

**N-Benzyl-N-methyl-1-(thiophen-2-yl)methanamine (D18)<sup>16</sup>**

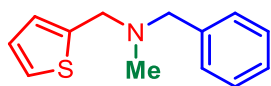

Purified by column chromatography on silica gel (ethyl acetate/hexane); Colorless oil; 89% yield (38.7 mg). <sup>1</sup>H NMR (500 MHz, CDCl<sub>3</sub>):  $\delta$  = 7.43 (d,  $J_{\text{H,H}}$  = 7.1 Hz, 2H), 7.39 (t,  $J_{\text{H,H}}$  = 7.5 Hz, 2H), 7.31-7.27 (m, 2H), 7.01-6.97 (m, 2H), 3.81 (s, 2H), 3.60 (s, 2H), 2.30 (s, 3H). <sup>13</sup>C{<sup>1</sup>H} NMR (126 MHz, CDCl<sub>3</sub>):  $\delta$  = 142.9, 139.1, 129.0, 128.3, 127.1, 126.4, 125.7, 124.9, 61.2, 56.1, 42.2.

**N-Methyl-1-(thiophen-2-yl)-N-(thiophen-2-ylmethyl)methanamine (D19)<sup>15</sup>**

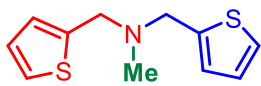

Purified by column chromatography on silica gel (ethyl acetate/hexane); Colorless oil; 87% yield (38.9 mg). <sup>1</sup>H NMR (500 MHz, CDCl<sub>3</sub>):  $\delta$  = 7.26 (d,  $J_{\text{H,H}}$  = 3.9 Hz, 2H), 6.97-6.94 (m, 4H), 3.79 (s, 4H), 2.33 (s, 3H). <sup>13</sup>C{<sup>1</sup>H} NMR (126 MHz, CDCl<sub>3</sub>):  $\delta$  = 142.3, 126.5, 126.0, 125.1, 55.3, 42.1.

**N-Benzyl-2-(1H-indol-3-yl)-N-methylethan-1-amine (D20)<sup>17</sup>**

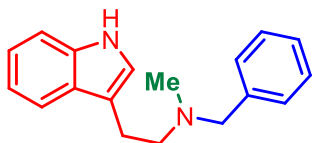

Purified by column chromatography on silica gel (ethyl acetate/hexane); Colorless oil; 89% yield (47.1 mg). <sup>1</sup>H NMR (500 MHz, CDCl<sub>3</sub>):  $\delta$  = 8.09 (bs, 1H), 7.58 (d,  $J_{\text{H,H}}$  = 7.9 Hz, 1H), 7.40 – 7.32 (m, 5H), 7.28 (dd,  $J_{\text{H,H}}$  = 13.5, 6.6 Hz, 1H), 7.21 (t,  $J_{\text{H,H}}$  = 7.4 Hz, 1H), 7.13 (t,  $J_{\text{H,H}}$  = 7.5 Hz, 1H), 6.99 (d,  $J_{\text{H,H}}$  = 2.3 Hz, 1H), 3.65 (s, 2H), 3.05-3.02 (m, 2H), 2.82-2.78 (m, 2H), 2.37 (s, 3H). <sup>13</sup>C{<sup>1</sup>H} NMR (126 MHz, CDCl<sub>3</sub>):  $\delta$  = 139.1, 136.3, 129.3, 128.4, 127.7, 127.1, 122.0, 121.6, 119.3, 119.0, 114.6, 111.2, 62.4, 58.1, 42.3, 23.4.

**1-[(N-Benzyl-N-methylamino)methyl]ferrocene (D21)**

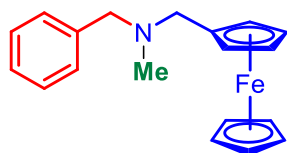

Purified by column chromatography on silica gel (ethyl acetate/hexane); Colorless oil; 87% yield (60.8 mg). <sup>1</sup>H NMR (500 MHz, CDCl<sub>3</sub>):  $\delta$  = 7.27-7.25 (m, 4H), 7.22-7.20 (m, 1H), 4.14 (s, 2H), 4.08 (s, 2H), 4.04 (s, 5H), 3.40 (s, 4H), 2.09 (s, 3H). <sup>13</sup>C{<sup>1</sup>H} NMR (126 MHz, CDCl<sub>3</sub>):  $\delta$  =

139.4, 129.1, 128.3, 127.0, 83.3, 70.3, 68.6, 68.1, 61.1, 57.0, 41.8. **ESI-MS:** Calcd. for  $C_{19}H_{22}FeN_3^+$ ,  $[M+H]^+$ : 320.1096; found: 320.1108.

**N-(4-Methoxybenzyl)-N-methyl-2-morpholinoethan-1-amine (D22)**

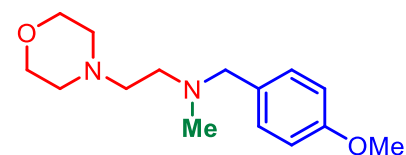 Purified by column chromatography on silica gel (ethyl acetate/hexane); Colorless oil; 79% yield (41.8 mg).  **$^1H$  NMR** (400 MHz,  $CDCl_3$ ):  $\delta$  = 7.20 (d,  $J_{H,H}$  = 8.5 Hz, 2H), 6.83 (d,  $J_{H,H}$  = 8.6 Hz, 2H), 3.77 (s, 3H), 3.70-3.66 (m, 4H), 3.44 (s, 2H), 2.49 (s, 4H), 2.44-2.39 (m, 4H), 2.21 (s, 3H).  **$^{13}C\{^1H\}$  NMR** (126 MHz,  $CDCl_3$ ):  $\delta$  = 158.8, 131.0, 130.2, 113.7, 67.0, 62.2, 57.1, 55.3, 54.2, 54.1, 42.7. **ESI-MS:** Calcd. for  $C_{15}H_{25}N_2O_2^+$ ,  $[M+H]^+$ : 265.1911; found: 265.1911.

**N-(4-Methoxybenzyl)-N-methyl-2-phenylethan-1-amine (D23)<sup>18</sup>**

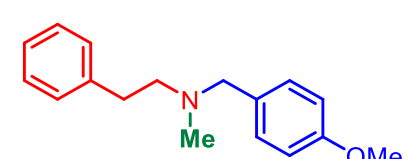 Purified by column chromatography on silica gel (ethyl acetate/hexane); Colorless oil; 90% yield (40.6 mg).  **$^1H$  NMR** (500 MHz,  $CDCl_3$ ):  $\delta$  = 7.32 (t,  $J_{H,H}$  = 7.8 Hz, 2H), 7.28-7.20 (m, 5H), 6.89 (d,  $J_{H,H}$  = 8.6 Hz, 2H), 3.83 (s, 3H), 3.55 (s, 2H), 2.87 (dd,  $J_{H,H}$  = 9.5, 6.5 Hz, 2H), 2.71-2.65 (m, 2H), 2.31 (s, 3H).  **$^{13}C\{^1H\}$  NMR** (126 MHz,  $CDCl_3$ ):  $\delta$  = 158.7, 140.6, 131.0, 130.2, 128.8, 128.6, 128.4, 126.0, 114.0, 113.7, 61.6, 59.1, 55.3, 42.1, 33.9.

**N-Benzyl-N-methylhexan-1-amine (D24)<sup>19</sup>**

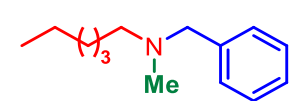 Purified by column chromatography on silica gel (ethyl acetate/hexane); Colorless oil; 89% yield (36.6 mg).  **$^1H$  NMR** (500 MHz,  $CDCl_3$ ):  $\delta$  = 7.35-7.31 (m, 4H), 7.26 (td,  $J_{H,H}$  = 5.5, 5.0, 2.5 Hz, 1H), 3.50 (s, 2H), 2.40-2.37 (m, 2H), 2.21 (s, 3H), 1.53 (q,  $J_{H,H}$  = 7.8 Hz, 2H), 1.36-1.28 (m, 6H), 0.91 (t,  $J_{H,H}$  = 6.8 Hz, 3H).  **$^{13}C\{^1H\}$  NMR** (126 MHz,  $CDCl_3$ ):  $\delta$  = 139.5, 129.2, 128.3, 126.9, 62.5, 57.8, 42.4, 32.0, 27.5, 27.3, 22.8, 14.2.

**N-Benzyl-N-methylcyclohexanamine (D25)<sup>20</sup>**

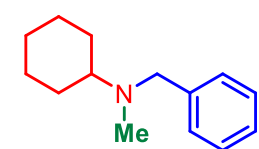 Purified by column chromatography on silica gel (ethyl acetate/hexane); Colorless oil; 82% yield (33.3 mg).  **$^1H$  NMR** (500 MHz,  $CDCl_3$ ):  $\delta$  = 7.32 (td,  $J_{H,H}$  = 8.6, 6.5 Hz, 4H), 7.26-7.21 (m, 1H), 3.58 (s, 2H), 2.48-2.42 (m, 1H), 2.20 (s, 3H), 1.93-1.87 (m, 2H), 1.81 (dt,  $J_{H,H}$  = 12.6, 3.4 Hz, 2H), 1.64 (ddd,  $J_{H,H}$  = 11.5,

4.8, 2.2 Hz, 1H), 1.36-1.19 (m, 4H), 1.17-1.07 (m, 1H).  $^{13}\text{C}\{^1\text{H}\}$  NMR (126 MHz,  $\text{CDCl}_3$ ):  $\delta$  = 140.3, 129.0, 128.3, 126.9, 62.7, 58.0, 37.8, 28.8, 26.6, 26.2.

**(3s,5s,7s)-N-Benzyl-N-methyladamantan-1-amine (D26)**

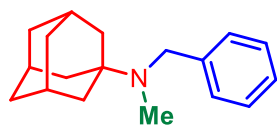

Purified by column chromatography on silica gel (ethyl acetate/hexane); Colorless oil; 83% yield (42.4 mg).  $^1\text{H}$  NMR (500 MHz,  $\text{CDCl}_3$ ):  $\delta$  = 7.35 (d,  $J_{\text{H,H}}$  = 7.4 Hz, 2H), 7.30 (t,  $J_{\text{H,H}}$  = 7.5 Hz, 2H), 7.22 (t,  $J_{\text{H,H}}$  = 7.2 Hz, 1H), 3.57 (s, 2H), 2.14 (s, 3H), 2.13 (s, 3H), 1.81 (d,  $J_{\text{H,H}}$  = 3.0 Hz, 6H), 1.72-1.63 (m, 6H).  $^{13}\text{C}\{^1\text{H}\}$  NMR (126 MHz  $\text{CDCl}_3$ ):  $\delta$  = 142.0, 128.8, 128.2, 126.5, 54.2, 53.6, 39.0, 37.1, 33.4, 29.9. **ESI-MS**: Calcd. for  $\text{C}_{18}\text{H}_{26}\text{N}^+$ ,  $[\text{M}+\text{H}]^+$ : 256.2060; found: 256.2064.

**2-(Benzyl(methyl)amino)ethan-1-ol (D27)<sup>21</sup>**

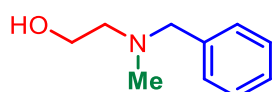

Purified by column chromatography on silica gel (ethyl acetate/hexane); Colorless oil; 85% yield (28.1 mg).  $^1\text{H}$  NMR (500 MHz,  $\text{CDCl}_3$ ):  $\delta$  = 7.36-7.26 (m, 5H), 3.62-3.60 (m, 2H), 3.56 (s, 2H), 2.60-2.58 (m, 2H), 2.22 (s, 3H).  $^{13}\text{C}\{^1\text{H}\}$  NMR (126 MHz,  $\text{CDCl}_3$ ):  $\delta$  = 138.6, 129.1, 128.4, 127.3, 62.4, 58.4, 58.4, 41.6.

**N-Benzyl-N-methyloleylamine (D28)<sup>22</sup>**

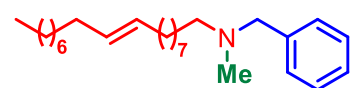

Purified by column chromatography on silica gel (ethyl acetate/hexane); Colorless oil; 85% yield (65.6 mg).  $^1\text{H}$  NMR (500 MHz,  $\text{CDCl}_3$ ):  $\delta$  = 7.34 (d,  $J_{\text{H,H}}$  = 4.6 Hz, 4H), 7.26 (td,  $J_{\text{H,H}}$  = 4.8, 2.5 Hz, 1H), 5.42 (t,  $J_{\text{H,H}}$  = 3.5 Hz, 1H), 5.38 (t,  $J_{\text{H,H}}$  = 4.9 Hz, 1H), 3.50 (s, 2H), 2.38 (t,  $J_{\text{H,H}}$  = 7.3 Hz, 2H), 2.21 (s, 3H), 2.05 (q,  $J_{\text{H,H}}$  = 6.6 Hz, 3H), 2.00 (d,  $J_{\text{H,H}}$  = 5.3 Hz, 1H), 1.57-1.50 (m, 2H), 1.33-1.27 (m, 22H), 0.91 (t,  $J_{\text{H,H}}$  = 6.8 Hz, 3H).  $^{13}\text{C}\{^1\text{H}\}$  NMR (126 MHz,  $\text{CDCl}_3$ ):  $\delta$  = 139.4, 130.0, 130.0, 129.2, 128.3, 126.9, 62.5, 57.8, 42.4, 32.7, 32.1, 29.9, 29.8, 29.8, 29.7, 29.7, 29.5, 29.5, 29.4, 29.3, 27.6, 27.6, 27.4, 22.8, 22.7, 14.3.

**N-benzyl-N-methylpentan-1-amine (D29)<sup>23</sup>**

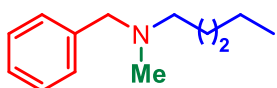

**D29**

Purified by column chromatography on silica gel (ethyl acetate/hexane); Brown oil; 85% yield (65.6 mg).  $^1\text{H}$  NMR (400 MHz,  $\text{CDCl}_3$ ):  $\delta$  = 7.35-7.22 (m, 5H), 3.49 (s, 2H), 2.36 (t,  $J_{\text{H,H}}$  = 7.3 Hz, 2H), 2.19 (s, 3H), 1.56-

1.49 (m, 2H), 1.34-1.27 (m, 6H), 0.90 (t,  $J_{\text{H,H}} = 6.8$  Hz, 3H).  $^{13}\text{C}\{^1\text{H}\}$  NMR (101 MHz,  $\text{CDCl}_3$ ):  $\delta = 139.2, 129.2, 128.3, 127.0, 62.4, 57.6, 42.3, 29.8, 27.1, 22.7, 14.2$ .

#### N-Benzyl-N-methyl-1-phenylethan-1-amine (D30)<sup>24</sup>

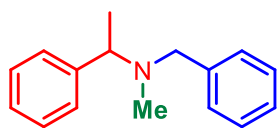

Purified by column chromatography on silica gel (ethyl acetate/hexane); Colorless oil; 82% yield (36.9 mg).  $^1\text{H}$  NMR (500 MHz,  $\text{CDCl}_3$ ):  $\delta = 7.44$  (d,  $J_{\text{H,H}} = 7.7$  Hz, 2H), 7.40-7.31 (m, 6H), 7.30-7.23 (m, 2H), 3.68 (q,  $J_{\text{H,H}} = 6.8$  Hz, 1H), 3.62 (d,  $J_{\text{H,H}} = 13.4$  Hz, 1H), 3.34 (d,  $J_{\text{H,H}} = 13.2$  Hz, 1H), 2.17 (s, 3H), 1.46 (d,  $J_{\text{H,H}} = 6.8$  Hz, 3H).  $^{13}\text{C}\{^1\text{H}\}$  NMR (126 MHz,  $\text{CDCl}_3$ ):  $\delta = 144.3, 140.2, 128.9, 128.3, 127.8, 126.9, 126.8, 63.4, 59.0, 38.5, 18.5$ .

#### N-(4-Fluorobenzyl)-N-methyl-1-phenylethan-1-amine (D31)

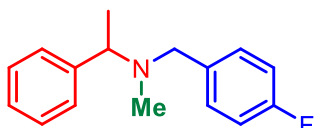

Purified by column chromatography on silica gel (ethyl acetate/hexane); Colorless oil; 80% yield (38.9 mg).  $^1\text{H}$  NMR (500 MHz,  $\text{CDCl}_3$ ):  $\delta = 7.42$  (d,  $J_{\text{H,H}} = 7.8$  Hz, 2H), 7.37 (t,  $J_{\text{H,H}} = 7.6$  Hz, 2H), 7.33-7.24 (m, 3H), 7.04-6.97 (m, 2H), 3.66 (q,  $J_{\text{H,H}} = 6.7$  Hz, 1H), 3.56 (d,  $J_{\text{H,H}} = 13.3$  Hz, 1H), 3.29 (d,  $J_{\text{H,H}} = 13.1$  Hz, 1H), 2.15 (s, 3H), 1.45 (d,  $J_{\text{H,H}} = 6.4$  Hz, 3H).  $^{13}\text{C}\{^1\text{H}\}$  NMR (126 MHz,  $\text{CDCl}_3$ ):  $\delta = 162.0$  (d,  $J_{\text{C,F}} = 244.4$  Hz), 144.1, 135.8, 130.3 (d,  $J_{\text{C,F}} = 8.8$  Hz), 128.4, 127.8, 127.0, 115.1 (d,  $J_{\text{C,F}} = 21.4$  Hz), 63.4, 58.2, 38.3, 18.5. **ESI-MS**: Calcd. for  $\text{C}_{16}\text{H}_{19}\text{FN}^+$ ,  $[\text{M}+\text{H}]^+$ : 244.1496; found: 244.1488.

#### N-(4-Methylbenzyl)-N-methyl-1-phenylethan-1-amine (D32)<sup>25</sup>

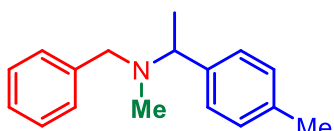

Purified by column chromatography on silica gel (ethyl acetate/hexanes); Colorless oil; 58% yield (27.8 mg).  $^1\text{H}$  NMR (500 MHz,  $\text{CDCl}_3$ ):  $\delta = 7.33$ -7.21 (m, 7H), 7.15 (d,  $J_{\text{H,H}} = 7.7$  Hz, 2H), 3.62 (q,  $J_{\text{H,H}} = 6.7$  Hz, 1H), 3.58 (d,  $J_{\text{H,H}} = 13.3$  Hz, 1H), 3.29 (d,  $J_{\text{H,H}} = 13.3$  Hz, 1H), 2.34 (s, 3H), 2.13 (s, 3H), 1.41 (d,  $J_{\text{H,H}} = 6.8$  Hz, 3H).  $^{13}\text{C}\{^1\text{H}\}$  NMR (126 MHz,  $\text{CDCl}_3$ ):  $\delta = 136.5, 129.0, 128.9, 128.3, 127.8, 126.8, 63.0, 58.9, 38.5, 21.2, 18.6$ .

#### N-(4-Trifluoromethylbenzyl)-N-methyl-1-phenylethan-1-amine (D33)

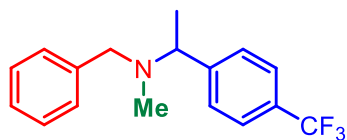

Purified by column chromatography on silica gel (ethyl acetate/hexanes); Colorless oil; 40% yield (23.5 mg). **<sup>1</sup>H NMR** (400 MHz, CDCl<sub>3</sub>): δ = 7.58 (d, *J*<sub>H,H</sub> = 8.4 Hz, 2H), 7.52 (d, *J*<sub>H,H</sub> = 8.2 Hz, 2H), 7.34-7.19 (m, 5H), 3.68 (q, *J*<sub>H,H</sub> = 6.7 Hz, 1H), 3.54 (d, *J*<sub>H,H</sub> = 13.4 Hz, 1H), 3.33 (d, *J*<sub>H,H</sub> = 13.3 Hz, 1H), 2.12 (s, 3H), 1.41 (d, *J*<sub>H,H</sub> = 6.7 Hz, 3H). **<sup>13</sup>C{<sup>1</sup>H} NMR** (101 MHz, CDCl<sub>3</sub>): δ = 148.8, 139.8, 129.4 (q, *J*<sub>C,F</sub> = 32 Hz), 128.8, 128.4, 128.0, 127.0, 125.3 (q, *J*<sub>C,F</sub> = 4 Hz), 124.4 (q, *J*<sub>C,F</sub> = 270 Hz), 62.9, 59.1, 38.4, 18.2. **ESI-MS**: Calcd. for C<sub>17</sub>H<sub>19</sub>F<sub>3</sub>N<sup>+</sup>, [M+H]<sup>+</sup>: 294.1464; found: 294.1472.

#### N-Methyl-N-(4-methylbenzyl)-1-phenylethan-1-amine (D34)<sup>26</sup>

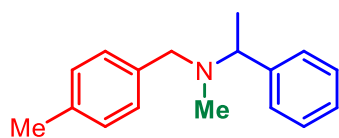

Purified by column chromatography on silica gel (ethyl acetate/hexane); Colorless oil; 65% yield (31.1 mg). **<sup>1</sup>H NMR** (400 MHz, CDCl<sub>3</sub>): δ = 7.43 (d, *J*<sub>H,H</sub> = 7.7 Hz, 2H), 7.37 (d, *J*<sub>H,H</sub> = 7.4 Hz, 2H), 7.27 (s, 1H), 7.24 (d, *J*<sub>H,H</sub> = 7.9 Hz, 2H), 7.14 (d, *J*<sub>H,H</sub> = 7.7 Hz, 2H), 3.66 (q, *J*<sub>H,H</sub> = 6.8 Hz, 1H), 3.58 (d, *J*<sub>H,H</sub> = 13.3 Hz, 1H), 3.31 (d, *J*<sub>H,H</sub> = 13.1 Hz, 1H), 2.36 (s, 3H), 2.16 (s, 3H), 1.45 (d, *J*<sub>H,H</sub> = 6.4 Hz, 3H). **<sup>13</sup>C{<sup>1</sup>H} NMR** (101 MHz, CDCl<sub>3</sub>): δ = 144.3, 137.1, 136.4, 129.0, 128.8, 128.3, 127.8, 126.9, 63.2, 58.7, 38.4, 21.2, 18.5.

#### N-(3-Fluorobenzyl)-N-methyl-1-phenylethan-1-amine (D35)

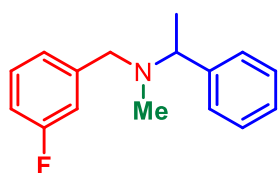

Purified by column chromatography on silica gel (ethyl acetate/hexane); Colorless oil; 50% yield (24.3 mg). **<sup>1</sup>H NMR** (400 MHz, CDCl<sub>3</sub>): δ = 7.42 (d, *J*<sub>H,H</sub> = 7.5 Hz, 2H), 7.36 (t, *J*<sub>H,H</sub> = 7.4 Hz, 2H), 7.29 – 7.23 (m, 2H), 7.12 – 7.07 (m, 2H), 6.92 (td, *J*<sub>H,H</sub> = 8.4, 2.6 Hz, 1H), 3.65 (q, *J*<sub>H,H</sub> = 6.7 Hz, 1H), 3.58 (d, *J*<sub>H,H</sub> = 13.5 Hz, 1H), 3.32 (d, *J*<sub>H,H</sub> = 13.5 Hz, 1H), 2.16 (s, 3H), 1.45 (d, *J*<sub>H,H</sub> = 6.7 Hz, 3H). **<sup>13</sup>C{<sup>1</sup>H} NMR** (101 MHz, CDCl<sub>3</sub>): δ = 163.2 (d, *J*<sub>C,F</sub> = 243 Hz), 144.2, 143.2 (d, *J*<sub>C,F</sub> = 7 Hz), 129.7 (d, *J*<sub>C,F</sub> = 8 Hz), 128.4, 127.8, 127.1, 124.3, 115.5 (d, *J*<sub>C,F</sub> = 21 Hz), 113.7 (d, *J*<sub>C,F</sub> = 21 Hz), 63.5, 58.5, 38.6, 18.6. **ESI-MS**: Calcd. for C<sub>16</sub>H<sub>19</sub>FN<sup>+</sup>, [M+H]<sup>+</sup>: 244.1496; found: 244.1470

#### 4-Methoxy-N-(4-methoxybenzyl)-N-methylaniline (D36)<sup>19</sup>



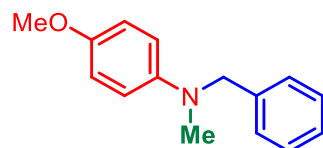

Purified by column chromatography on silica gel (ethyl acetate/hexanes); Colorless oil; 45% yield (20.5 mg).  $^1\text{H}$  NMR (400 MHz,  $\text{CDCl}_3$ ):  $\delta$  = 7.34-7.29 (m, 2H), 7.25 (d,  $J$  = 7.4 Hz, 3H), 6.85-6.80 (m, 2H), 6.77-6.73 (m, 2H), 4.43 (s, 2H), 3.76 (s, 3H), 2.92 (s, 3H).  $^{13}\text{C}\{^1\text{H}\}$  NMR (101 MHz,  $\text{CDCl}_3$ ):  $\delta$  = 151.9, 145.0, 139.4, 128.6, 127.2, 127.0, 114.9, 114.7, 58.1, 55.9, 39.2.

#### 4-Methoxy-N-(4-methoxybenzyl)-N-methylaniline (D37)<sup>27</sup>

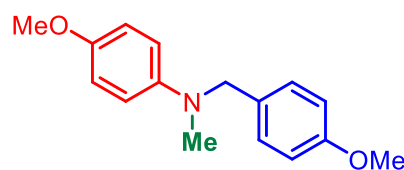

Purified by column chromatography on silica gel (ethyl acetate/hexane); Colorless oil; 58% yield (29.8 mg).  $^1\text{H}$  NMR (400 MHz,  $\text{CDCl}_3$ ):  $\delta$  = 7.17-7.14 (m, 2H), 6.86-6.81 (m, 4H), 6.77-6.74 (m, 2H), 4.35 (s, 2H), 3.79 (s, 3H), 3.76 (s, 3H), 2.87 (s, 3H).  $^{13}\text{C}\{^1\text{H}\}$  NMR (101 MHz,  $\text{CDCl}_3$ ):  $\delta$  = 158.7, 151.9, 145.0, 131.2, 128.5, 115.0, 114.8, 114.0, 57.6, 55.9, 55.4, 39.0.

#### 4-Methoxy-N-(4-methoxybenzyl)-N-methylaniline (D38)<sup>28</sup>

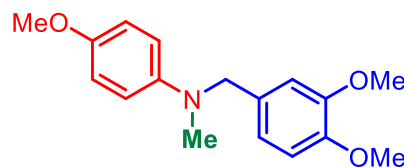

Purified by column chromatography on silica gel (ethyl acetate/hexane); Colorless oil; 62% yield (35.6 mg).  $^1\text{H}$  NMR (400 MHz,  $\text{CDCl}_3$ ):  $\delta$  = 6.84-6.76 (m, 7H), 4.34 (s, 2H), 3.86 (s, 3H), 3.82 (s, 3H), 3.76 (s, 3H), 2.87 (s, 3H).  $^{13}\text{C}\{^1\text{H}\}$  NMR (101 MHz,  $\text{CDCl}_3$ ):  $\delta$  = 152.1, 149.2, 148.1, 131.8, 119.4, 115.2, 114.8, 111.2, 110.5, 58.2, 56.1, 56.0, 55.9, 39.1.

#### N-Benzyl-N-(4-methoxybenzyl)ethanamine (D39)<sup>7</sup>

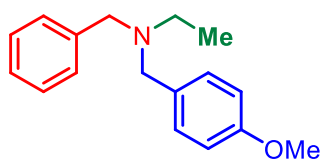

Purified by column chromatography on silica gel (ethyl acetate/hexane); Colorless oil; 85% yield (43.4 mg).  $^1\text{H}$  NMR (400 MHz,  $\text{CDCl}_3$ ):  $\delta$  = 7.37 (d,  $J_{\text{H,H}}$  = 7.2 Hz, 2H), 7.29 (dt,  $J_{\text{H,H}}$  = 13.0, 5.8 Hz, 4H), 7.21 (t,  $J_{\text{H,H}}$  = 7.2 Hz, 1H), 6.86-6.83 (m, 2H), 3.79 (s, 3H), 3.54 (s, 2H), 3.50 (s, 2H), 2.48 (q,  $J_{\text{H,H}}$  = 7.0 Hz, 2H), 1.05 (t,  $J_{\text{H,H}}$  = 7.2 Hz, 3H).  $^{13}\text{C}\{^1\text{H}\}$  NMR (126 MHz  $\text{CDCl}_3$ ):  $\delta$  = 158.6, 130.0, 128.9, 128.3, 126.8, 113.7, 77.4, 77.2, 77.1, 76.9, 57.7, 57.2, 55.4, 47.0, 12.0.

#### N-Benzyl-N-(4-methoxybenzyl)butan-1-amine (D40)

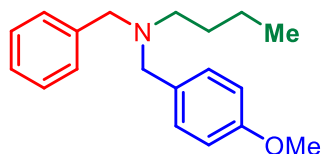

Purified by column chromatography on silica gel (ethyl acetate/hexane); Colorless oil; 83% yield (47.0 mg). **<sup>1</sup>H NMR** (500 MHz, CDCl<sub>3</sub>):  $\delta$  = 7.38 (d,  $J_{\text{H,H}}$  = 7.2 Hz, 2H), 7.34-7.27 (m, 4H), 7.26-7.21 (m, 1H), 6.89-6.84 (m, 2H), 3.81 (s, 3H), 3.55 (s, 2H), 3.50 (s, 2H), 2.44-2.39 (m, 2H), 1.54-1.46 (m, 2H), 1.31 (dq,  $J_{\text{H,H}}$  = 14.5, 7.3 Hz, 2H), 0.85 (t,  $J_{\text{H,H}}$  = 7.3 Hz, 3H). **<sup>13</sup>C{<sup>1</sup>H} NMR** (126 MHz, CDCl<sub>3</sub>):  $\delta$  = 158.6, 140.3, 132.2, 130.0, 128.9, 128.2, 126.8, 113.7, 58.3, 57.7, 55.4, 53.1, 29.4, 20.6, 14.2. **ESI-MS**: Calcd. for C<sub>19</sub>H<sub>26</sub>NO<sup>+</sup>, [M+H]<sup>+</sup>: 284.2009; found: 284.2007

### 1, 1'-(1, 3-Phenylene)bis(N-benzyl-N-methylmethanamine) (D41)

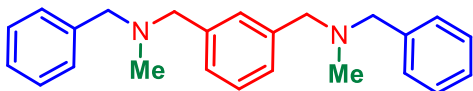

Purified by column chromatography on silica gel (ethyl acetate/hexanes); Colorless oil; 92% yield (63.4 mg). **<sup>1</sup>H NMR** (500 MHz, CDCl<sub>3</sub>):  $\delta$  = 7.42-7.39 (m, 5H), 7.36 (ddd,  $J_{\text{H,H}}$  = 8.7, 5.2, 2.1 Hz, 4H), 7.33 – 7.26 (m, 5H), 3.57 (dd,  $J_{\text{H,H}}$  = 5.8, 2.3 Hz, 8H), 2.23 (d,  $J_{\text{H,H}}$  = 2.5 Hz, 6H). **<sup>13</sup>C{<sup>1</sup>H} NMR** (126 MHz, CDCl<sub>3</sub>):  $\delta$  = 139.3, 139.2, 129.7, 129.1, 128.3, 128.2, 127.8, 127.0, 62.0, 61.9, 42.3. **ESI-MS**: Calcd. for C<sub>24</sub>H<sub>29</sub>N<sub>2</sub><sup>+</sup>, [M+H]<sup>+</sup>: 345.2325; found: 345.2318

### N1, N8-dibenzyl-N1, N8-dimethyloctane-1,8-diamine (D42)

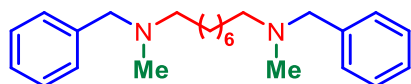

Purified by column chromatography on silica gel (ethyl acetate/hexane); Colorless oil; 84% yield (59.2 mg). **<sup>1</sup>H NMR** (500 MHz, CDCl<sub>3</sub>):  $\delta$  = 7.30 (d,  $J$  = 4.5 Hz, 8H), 7.26-7.21 (m, 2H), 3.47 (s, 4H), 2.34 (t,  $J_{\text{H,H}}$  = 7.3 Hz, 4H), 2.17 (s, 6H), 1.52-1.47 (m, 4H), 1.28 (d,  $J_{\text{H,H}}$  = 2.8 Hz, 8H). **<sup>13</sup>C{<sup>1</sup>H} NMR** (126 MHz, CDCl<sub>3</sub>):  $\delta$  = 139.4, 129.2, 128.3, 126.9, 62.4, 57.7, 42.4, 29.7, 27.5. **ESI-MS**: Calcd. for C<sub>24</sub>H<sub>37</sub>N<sub>2</sub><sup>+</sup>, [M+H]<sup>+</sup>: 353.2951; found: 353.2949.

### N-(4-(Tert-butyl)benzyl)-N-methyl-1-(naphthalen-1-yl)methanamine (D43)<sup>29</sup>

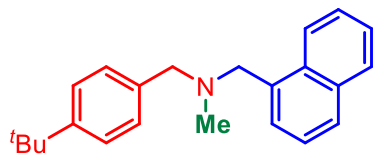

Purified by column chromatography on silica gel (ethyl acetate/hexane); Colorless oil; 87% yield (55.2 mg). **<sup>1</sup>H NMR** (500 MHz, CDCl<sub>3</sub>):  $\delta$  = 8.28-8.26 (m, 1H), 7.87 (dd,  $J_{\text{H,H}}$  = 7.7, 2.0 Hz, 1H), 7.79 (d,  $J_{\text{H,H}}$  = 8.1 Hz, 1H), 7.51 (ddd,  $J_{\text{H,H}}$  = 6.8, 3.9, 2.2 Hz, 3H), 7.45-7.41 (m, 1H), 7.37 (d,  $J_{\text{H,H}}$  = 8.5 Hz, 2H), 7.32 (d,  $J_{\text{H,H}}$  = 8.1 Hz, 2H), 3.96 (s, 2H), 3.61 (s, 2H), 2.24 (s, 3H), 1.35 (s,

9H).  $^{13}\text{C}\{^1\text{H}\}$  NMR (126 MHz,  $\text{CDCl}_3$ ):  $\delta$  = 150.0, 136.4, 135.2, 134.0, 132.7, 128.9, 128.5, 128.0, 127.5, 125.8, 125.7, 125.2, 125.0, 62.2, 60.6, 42.5, 34.6, 31.6.

**N-[2-(1H-Indol-3-yl)ethyl]-4-[[benzyl(methyl)amino]methyl]benzamide (D44)<sup>30</sup>**

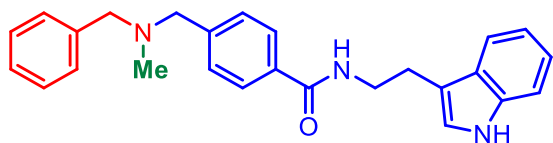

Purified by column chromatography on silica gel (ethyl acetate/hexane); Colorless oil; 80% yield (63.6 mg).  $^1\text{H}$  NMR (400 MHz,  $\text{CDCl}_3$ ):  $\delta$  = 8.31 (s,

1H), 7.64 (dd,  $J_{\text{H,H}}$  = 8.1, 3.5 Hz, 3H), 7.40 – 7.30 (m, 7H), 7.28 – 7.25 (m, 1H), 7.21 (t,  $J_{\text{H,H}}$  = 7.7 Hz, 1H), 7.13 (t,  $J_{\text{H,H}}$  = 7.5 Hz, 1H), 7.04 (d,  $J_{\text{H,H}}$  = 2.4 Hz, 1H), 6.28 (t,  $J_{\text{H,H}}$  = 5.8 Hz, 1H), 3.80 (q,  $J_{\text{H,H}}$  = 6.4 Hz, 2H), 3.52 (d,  $J_{\text{H,H}}$  = 5.4 Hz, 4H), 3.09 (t,  $J_{\text{H,H}}$  = 6.7 Hz, 2H), 2.17 (s, 3H).  $^{13}\text{C}\{^1\text{H}\}$  NMR (101 MHz,  $\text{CDCl}_3$ ):  $\delta$  = 167.6, 143.3, 139.1, 136.6, 133.5, 129.07, 128.4, 127.5, 127.2, 127.0, 122.4, 122.3, 119.7, 118.9, 113.1, 111.5, 62.0, 61.5, 42.4, 40.4, 25.4.

**N-[2-(1H-Indol-3-yl)ethyl]-4-[[3-chlorobenzyl(methyl)- amino]methyl]benzamide (D45)<sup>30</sup>**

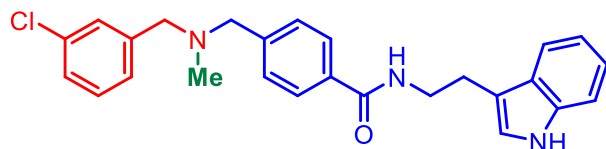

Purified by column chromatography on silica gel (ethyl acetate/hexanes); Colorless oil; 73% yield (63.1 mg).  $^1\text{H}$  NMR (500 MHz,  $\text{CDCl}_3$ ):

$\delta$  = 8.30 (s, 1H), 7.64 (dd,  $J_{\text{H,H}}$  = 8.3, 2.3 Hz, 3H), 7.39-7.33 (m, 4H), 7.22 (dd,  $J_{\text{H,H}}$  = 6.7, 3.8 Hz, 4H), 7.13 (s, 1H), 7.05 (d,  $J_{\text{H,H}}$  = 2.3 Hz, 1H), 6.28 (s, 1H), 3.84-3.76 (m, 2H), 3.53 (s, 2H), 3.47 (s, 2H), 3.09 (t,  $J_{\text{H,H}}$  = 6.6 Hz, 2H), 2.16 (s, 3H).  $^{13}\text{C}\{^1\text{H}\}$  NMR (126 MHz,  $\text{CDCl}_3$ ):  $\delta$  = 167.5, 142.9, 141.4, 136.6, 134.3, 133.6, 129.7, 129.0, 128.9, 127.4, 127.3, 127.0, 122.3, 122.3, 119.6, 118.9, 113.1, 111.5, 61.6, 61.3, 42.4, 40.4, 25.4.

**N-[2-(1H-Indol-3-yl)ethyl]-4-[[2-methoxybenzyl(methyl)-amino]methyl]benzamide(D46)<sup>30</sup>**

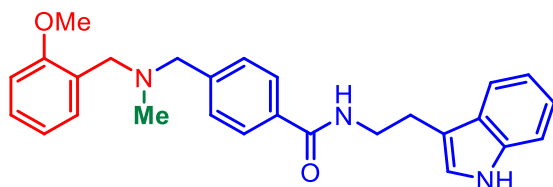

Purified by column chromatography on silica gel (ethyl acetate/hexane); Colorless oil; 59% yield (50.4 mg).  $^1\text{H}$  NMR (400 MHz,  $\text{CDCl}_3$ ):  $\delta$  = 8.23 (s,

1H), 7.62 (dd,  $J_{\text{H,H}}$  = 10.0, 7.7 Hz, 3H), 7.41-7.34 (m, 4H), 7.23-7.16 (m, 2H), 7.11 (t,  $J_{\text{H,H}}$  = 7.4 Hz, 1H), 7.03 (d,  $J_{\text{H,H}}$  = 2.1 Hz, 1H), 6.93 (t,  $J_{\text{H,H}}$  = 7.5 Hz, 1H), 6.85 (d,  $J_{\text{H,H}}$  = 8.1 Hz, 1H), 6.21 (d,  $J_{\text{H,H}}$  = 6.1 Hz, 1H), 3.78 (d,  $J_{\text{H,H}}$  = 4.2 Hz, 5H), 3.58 (d,  $J_{\text{H,H}}$  = 6.2 Hz, 4H), 3.08 (t,  $J_{\text{H,H}}$  = 6.7 Hz, 2H), 2.19 (s, 3H).  $^{13}\text{C}\{^1\text{H}\}$  NMR (101 MHz,

CDCl<sub>3</sub>):  $\delta$  = 167.5, 157.9, 136.6, 133.5, 130.7, 129.2, 128.4, 127.5, 127.2, 126.9, 122.4, 122.3, 120.5, 119.7, 118.9, 113.2, 111.4, 110.6, 61.7, 55.5, 55.2, 42.3, 40.3, 25.4.

**1,1'-(1,4-phenylene)bis(N-benzyl-N-methylmethanamine) (D47)**<sup>31</sup>

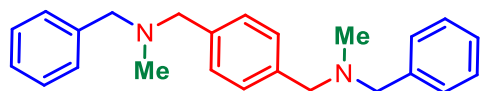

Purified by column chromatography on silica gel (ethyl acetate/hexane); Colorless oil; 93% yield (64.1 mg). <sup>1</sup>H

NMR (500 MHz, CDCl<sub>3</sub>):  $\delta$  = 7.40 (d, *J* = 7.0 Hz, 4H), 7.37- 7.33 (m, 8H), 7.29-7.25 (m, 2H), 3.55 (s, 4H), 3.54 (s, 4H), 2.21 (s, 6H). <sup>13</sup>C{<sup>1</sup>H} NMR (126 MHz, CDCl<sub>3</sub>):  $\delta$  = 139.5, 138.1, 129.1, 129.0, 128.3, 127.0, 62.0, 61.7, 42.4, 29.8.

## 8. References

- (1) Maji, M.; Chakrabarti, K.; Panja, D.; Kundu, S. Sustainable Synthesis of N-Heterocycles in Water Using Alcohols Following the Double Dehydrogenation Strategy. *J. Catal.* **2019**, *373*, 93–102.
- (2) Maji, M.; Borthakur, I.; Srivastava, S.; Kundu, S. Regio -Selective C3- and N-Alkylation of Indolines in Water under Air Using Alcohols. *J. Org. Chem.* **2022**, *87* (9), 5603–5616.
- (3) Borthakur, I.; Maji, M.; Joshi, A.; Kundu, S. Reductive Alkylation of Azides and Nitroarenes with Alcohols: A Selective Route to Mono- and Dialkylated Amines. *J. Org. Chem.* **2022**, *87* (1), 628–643.
- (4) Chadwick, R. C.; Kardelis, V.; Lim, P.; Adronov, A. Metal-Free Reduction of Secondary and Tertiary N-Phenyl Amides by Tris(Pentafluorophenyl)Boron-Catalyzed Hydrosilylation. *J. Org. Chem.* **2014**, *79* (16), 7728–7733.
- (5) Nwachukwu, C. I.; McFadden, T. P.; Roberts, A. G. Ni-Catalyzed Iterative Alkyl Transfer from Nitrogen Enabled by the In Situ Methylation of Tertiary Amines. *J. Org. Chem.* **2020**, *85* (15), 9979–9992.
- (6) Molander, G. A.; Sandrock, D. L. Aminomethylations via Cross-Coupling of Potassium Organotrifluoroborates with Aryl Bromides. *Org. Lett.* **2007**, *9* (8), 1597–1600.
- (7) Azizi, K.; Akrami, S.; Madsen, R. Manganese(III) Porphyrin-Catalyzed Dehydrogenation of Alcohols to Form Imines, Tertiary Amines and Quinolines. *Chem. – A Eur. J.* **2019**, *25* (25), 6439–6446.
- (8) Yamaguchi, K.; He, J.; Oishi, T.; Mizuno, N. The “Borrowing Hydrogen Strategy” by Supported Ruthenium Hydroxide Catalysts: Synthetic Scope of Symmetrically and Unsymmetrically Substituted Amines. *Chem. - A Eur. J.* **2010**, *16* (24), 7199–7207.
- (9) Thai, T.-T.; Mérel, D. S.; Poater, A.; Gaillard, S.; Renaud, J.-L. Highly Active Phosphine-Free Bifunctional Iron Complex for Hydrogenation of Bicarbonate and Reductive Amination. *Chem. - A Eur. J.* **2015**, *21* (19), 7066–7070.
- (10) Chen, X.; Ai, Y.; Liu, P.; Yang, C.; Yang, J.; Li, F. Cp\*Ir Complex Bearing a Flexible Bridging and Functional 2,2'-Methylenebibilimidazole Ligand as an Auto-Tandem Catalyst for the Synthesis of N-Methyl Tertiary Amines from Imines via Transfer Hydrogenation/N-Methylation with Methanol. *J. Catal.* **2021**, *402*, 325–334.
- (11) Yan, T.; Feringa, B. L.; Barta, K. Benzylamines via Iron-Catalyzed Direct Amination of Benzyl Alcohols. *ACS Catal.* **2016**, *6* (1), 381–388.
- (12) Kaur, M.; Sharma, E.; Singh, A.; Singh, P.; Singh, K. N. Experimental and Theoretical Observations on the Intramolecular Nucleophilic Addition of  $\alpha$ -Amino Carbanions to Arynes: Synthesis of 1-Aryl-1,2,3,4-Tetrahydroisoquinolines. *European J. Org. Chem.* **2016**, *2016* (24), 4159–4170.
- (13) Shen, Y.; Rovis, T. Late-Stage N -Me Selective Arylation of Trialkylamines Enabled by Ni/Photoredox Dual Catalysis. *J. Am. Chem. Soc.* **2021**, *143* (40), 16364–16369.

- (14) Lator, A.; Gaillard, Q. G.; Mérel, D. S.; Lohier, J.-F.; Gaillard, S.; Poater, A.; Renaud, J.-L. Room-Temperature Chemoselective Reductive Alkylation of Amines Catalyzed by a Well-Defined Iron(II) Complex Using Hydrogen. *J. Org. Chem.* **2019**, *84* (11), 6813–6829.
- (15) Lu, S.; Peng, J.; Wu, J.; Li, C.; Cao, X.; Gu, H. Novel Synthesis of N-Alkyl Amines from Tandem Coupling of Either Methylamine or Nitroalkane with Aldehyde. *Chem. Commun.* **2016**, *52* (4), 760–763.
- (16) Coufourier, S.; Ndiaye, D.; Gaillard, Q. G.; Bettoni, L.; Joly, N.; Mbaye, M. D.; Poater, A.; Gaillard, S.; Renaud, J.-L. Iron-Catalyzed Chemoselective Hydride Transfer Reactions. *Tetrahedron* **2021**, *90*, 132187.
- (17) Sakai, N.; Shimamura, K.; Ikeda, R.; Konakahara, T. Hf(OTf)<sub>4</sub>-Catalyzed Regioselective N-Aminomethylation of Indoles and Related NH-Containing Heterocycles. *J. Org. Chem.* **2010**, *75* (11), 3923–3926.
- (18) Sato, T.; Uozumi, Y.; Yamada, Y. M. A. Catalytic Reductive Alkylation of Amines in Batch and Microflow Conditions Using a Silicon-Wafer-Based Palladium Nanocatalyst. *ACS Omega* **2020**, *5* (41), 26938–26945.
- (19) Luo, Z.; Pan, Y.; Yao, Z.; Yang, J.; Zhang, X.; Liu, X.; Xu, L.; Fan, Q.-H. BF<sub>3</sub>·Et<sub>2</sub>O as a Metal-Free Catalyst for Direct Reductive Amination of Aldehydes with Amines Using Formic Acid as a Reductant. *Green Chem.* **2021**, *23* (14), 5205–5211.
- (20) Zou, Q.; Liu, F.; Zhao, T.; Hu, X. Reductive Amination of Ketones/Aldehydes with Amines Using BH<sub>3</sub>N(C<sub>2</sub>H<sub>5</sub>)<sub>3</sub> as a Reductant. *Chem. Commun.* **2021**, *57* (69), 8588–8591.
- (21) Xin, Z.; Jia, L.; Huang, Y.; Du, C.; Li, Y. Ru-Catalyzed Switchable N-Hydroxyethylation and N-Acetylation with Crude Glycerol. *ChemSusChem* **2020**, *13* (8), 2007–2011.
- (22) Hanada, S.; Tsutsumi, E.; Motoyama, Y.; Nagashima, H. Practical Access to Amines by Platinum-Catalyzed Reduction of Carboxamides with Hydrosilanes: Synergy of Dual Si–H Groups Leads to High Efficiency and Selectivity. *J. Am. Chem. Soc.* **2009**, *131* (41), 15032–15040.
- (23) Alcázar, J. Reproducibility Across Microwave Instruments: Preparation of a Set of 24 Compounds on a Multiwell Plate under Temperature-Controlled Conditions. *J. Comb. Chem.* **2005**, *7* (3), 353–355.
- (24) Bai, X.; Aiolfi, F.; Cettolin, M.; Piarulli, U.; Dal Corso, A.; Pignataro, L.; Gennari, C. Hydrogen-Borrowing Amination of Secondary Alcohols Promoted by a (Cyclopentadienone)Iron Complex. *Synthesis (Stuttg.)* **2019**, *51* (18), 3545–3555.
- (25) Utsunomiya, M.; Hartwig, J. F. Intermolecular, Markovnikov Hydroamination of Vinylarenes with Alkylamines. *J. Am. Chem. Soc.* **2003**, *125* (47), 14286–14287.
- (26) Baltzly, R.; Russell, P. B. Catalytic Debenzylation. III. The Influence of  $\alpha$ -Substitution on the Ease of Hydrogenolysis 1. *J. Am. Chem. Soc.* **1953**, *75* (22), 5598–5602.
- (27) Lopez, F. J.; Nitzan, D. N-Methylanilines from Benzylic Azides. *Tetrahedron Lett.* **1999**, *40* (11), 2071–2074.

- (28) Nayal, O. S.; Thakur, M. S.; Rana, R.; Upadhyay, R.; Maurya, S. K. Lewis-Acid-Catalyzed Direct Nucleophilic Substitution Reaction of Alcohols for the Functionalization of Aromatic Amines. *ChemistrySelect* **2019**, 4 (4), 1371–1374.
- (29) Guo, Z.; Pang, T.; Yan, L.; Wei, X.; Chao, J.; Xi, C. CO<sub>2</sub>-Tuned Highly Selective Reduction of Formamides to the Corresponding Methylamines. *Green Chem.* **2021**, 23 (19), 7534–7538.
- (30) López-Iglesias, B.; Pérez, C.; Morales-García, J. A.; Alonso-Gil, S.; Pérez-Castillo, A.; Romero, A.; López, M. G.; Villarroja, M.; Conde, S.; Rodríguez-Franco, M. I. New Melatonin–N, N-Dibenzyl( N-Methyl)Amine Hybrids: Potent Neurogenic Agents with Antioxidant, Cholinergic, and Neuroprotective Properties as Innovative Drugs for Alzheimer’s Disease. *J. Med. Chem.* **2014**, 57 (9), 3773–3785.
- (31) Bai, R.; Liang, Z.; Yoon, Y.; Liu, S.; Gaines, T.; Oum, Y.; Shi, Q.; Mooring, S. R.; Shim, H. Symmetrical Bis-Tertiary Amines as Novel CXCR4 Inhibitors. *Eur. J. Med. Chem.* **2016**, 118, 340–350.

## 9. Copies of $^1\text{H}$ and $^{13}\text{C}$ NMR of the Tertiary Amines

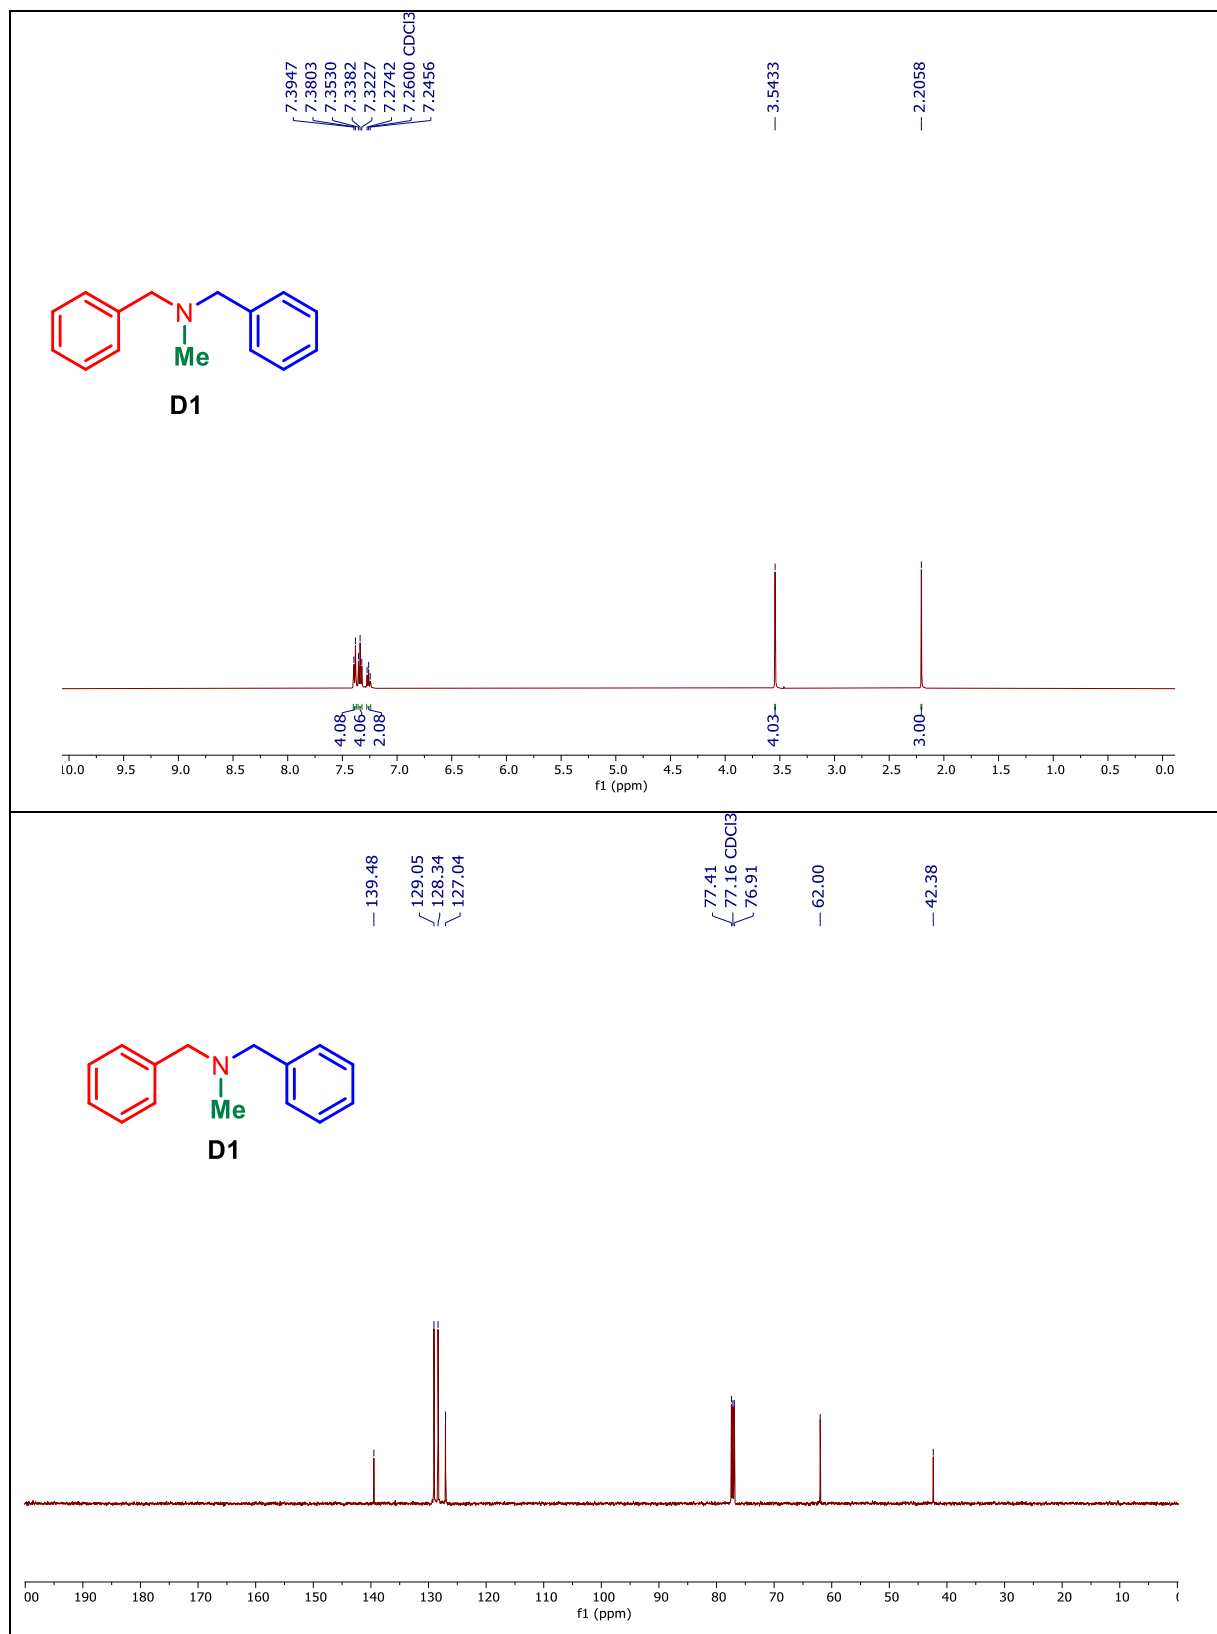



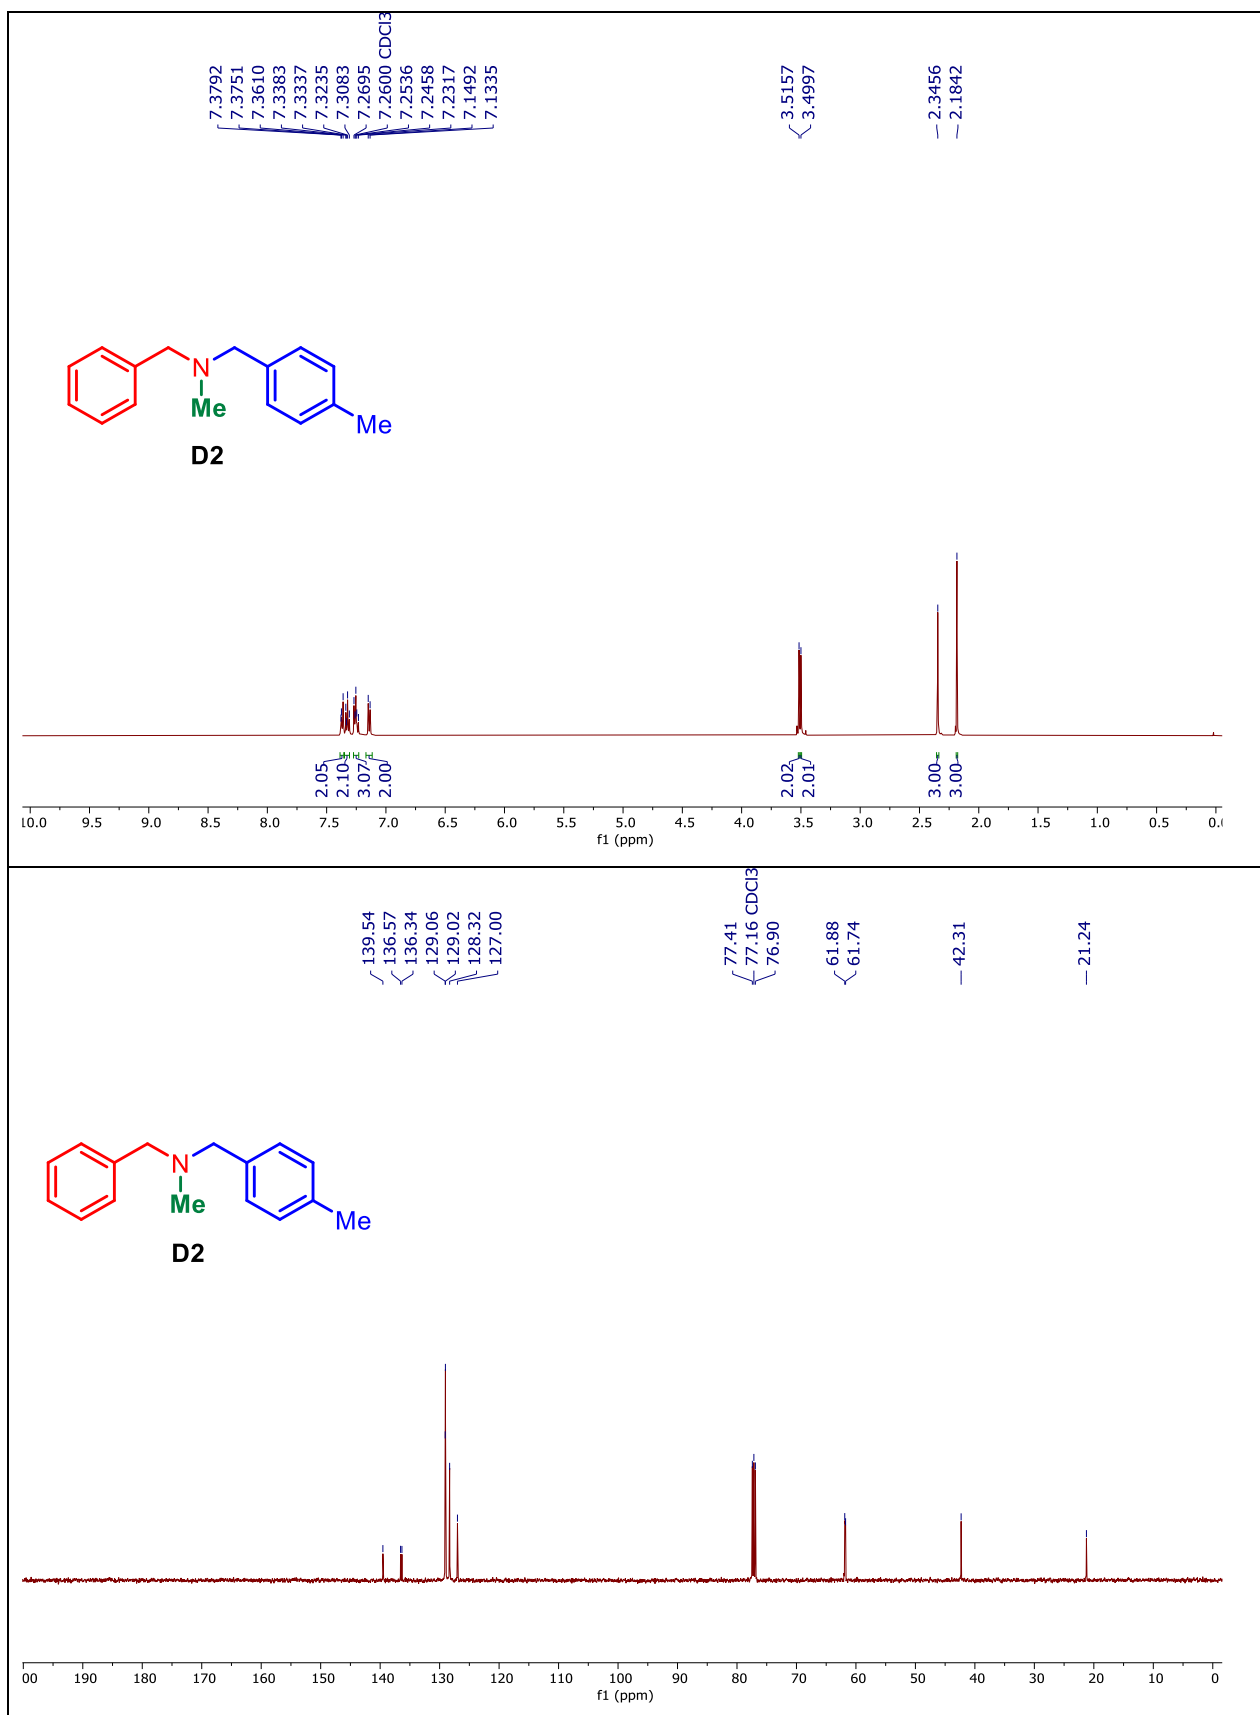

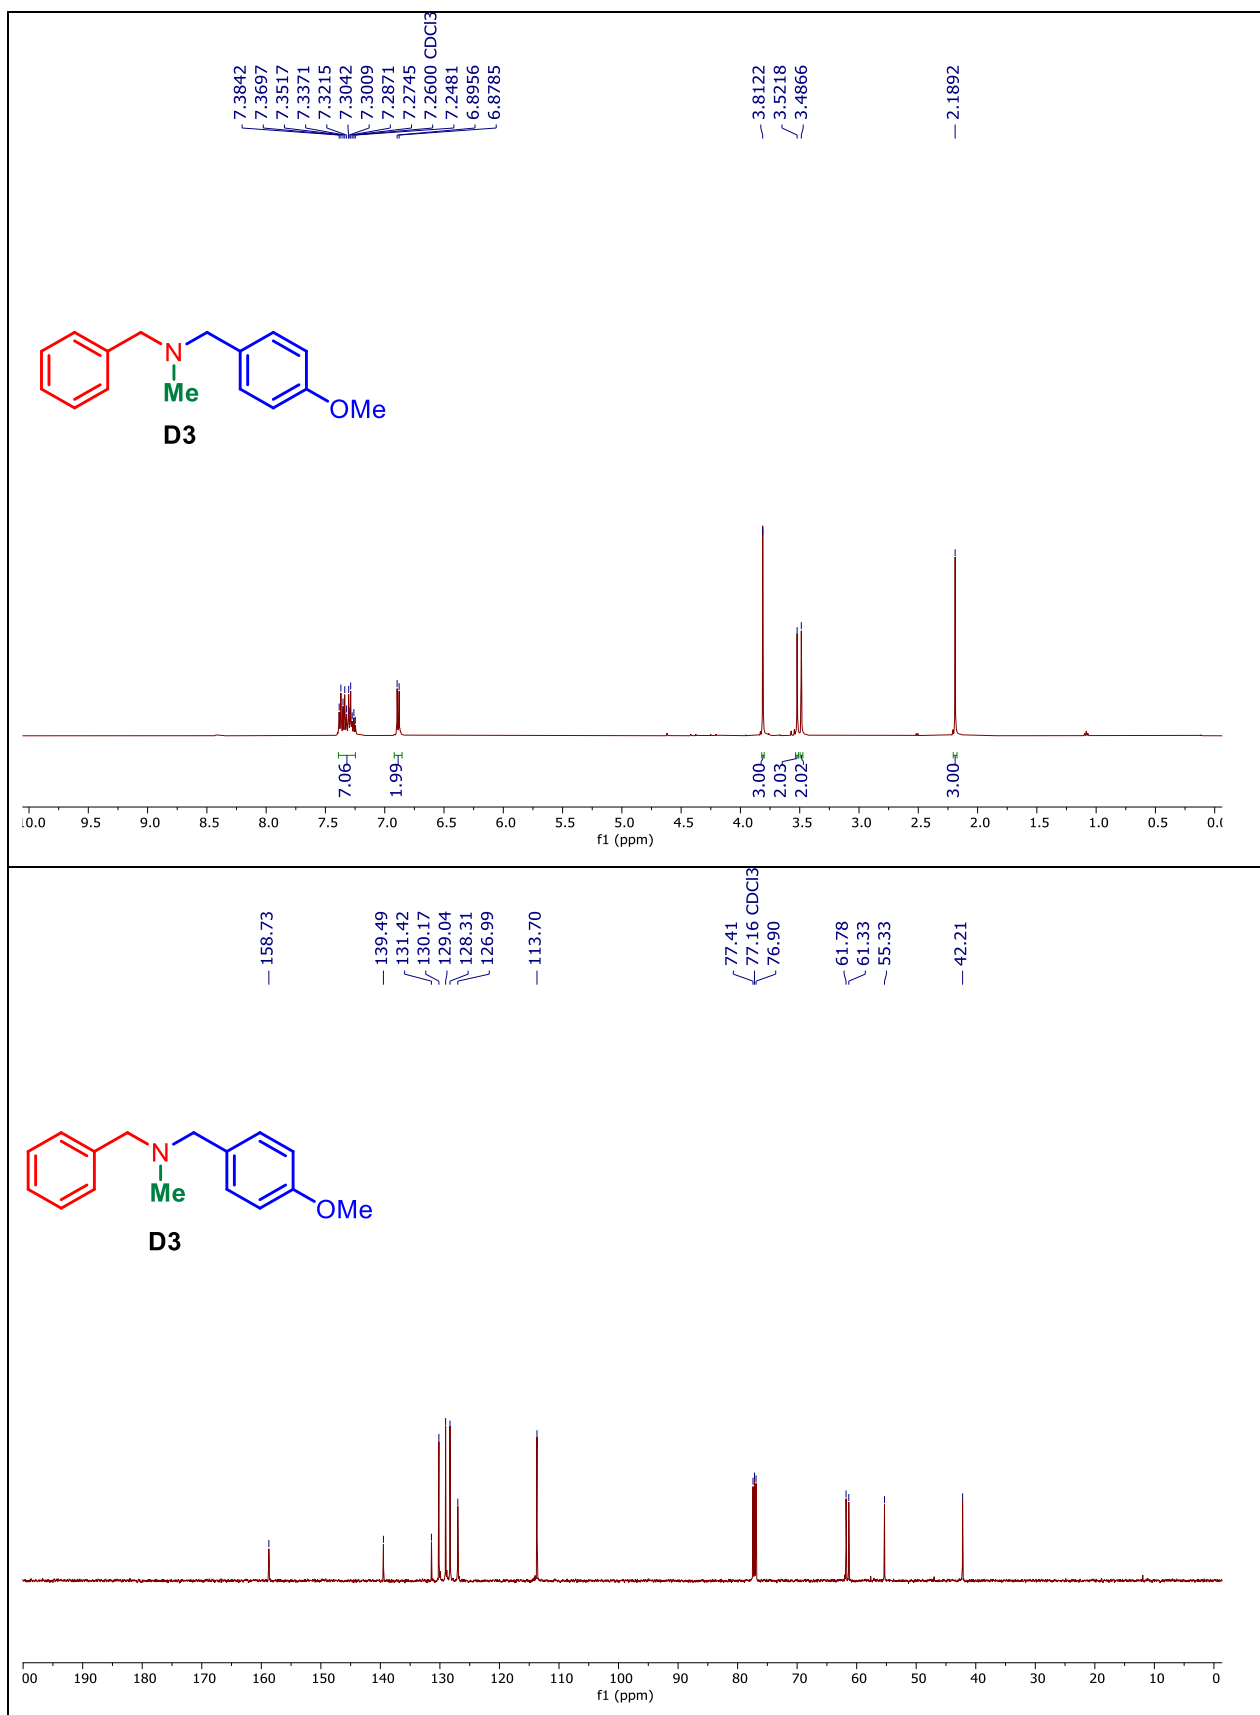

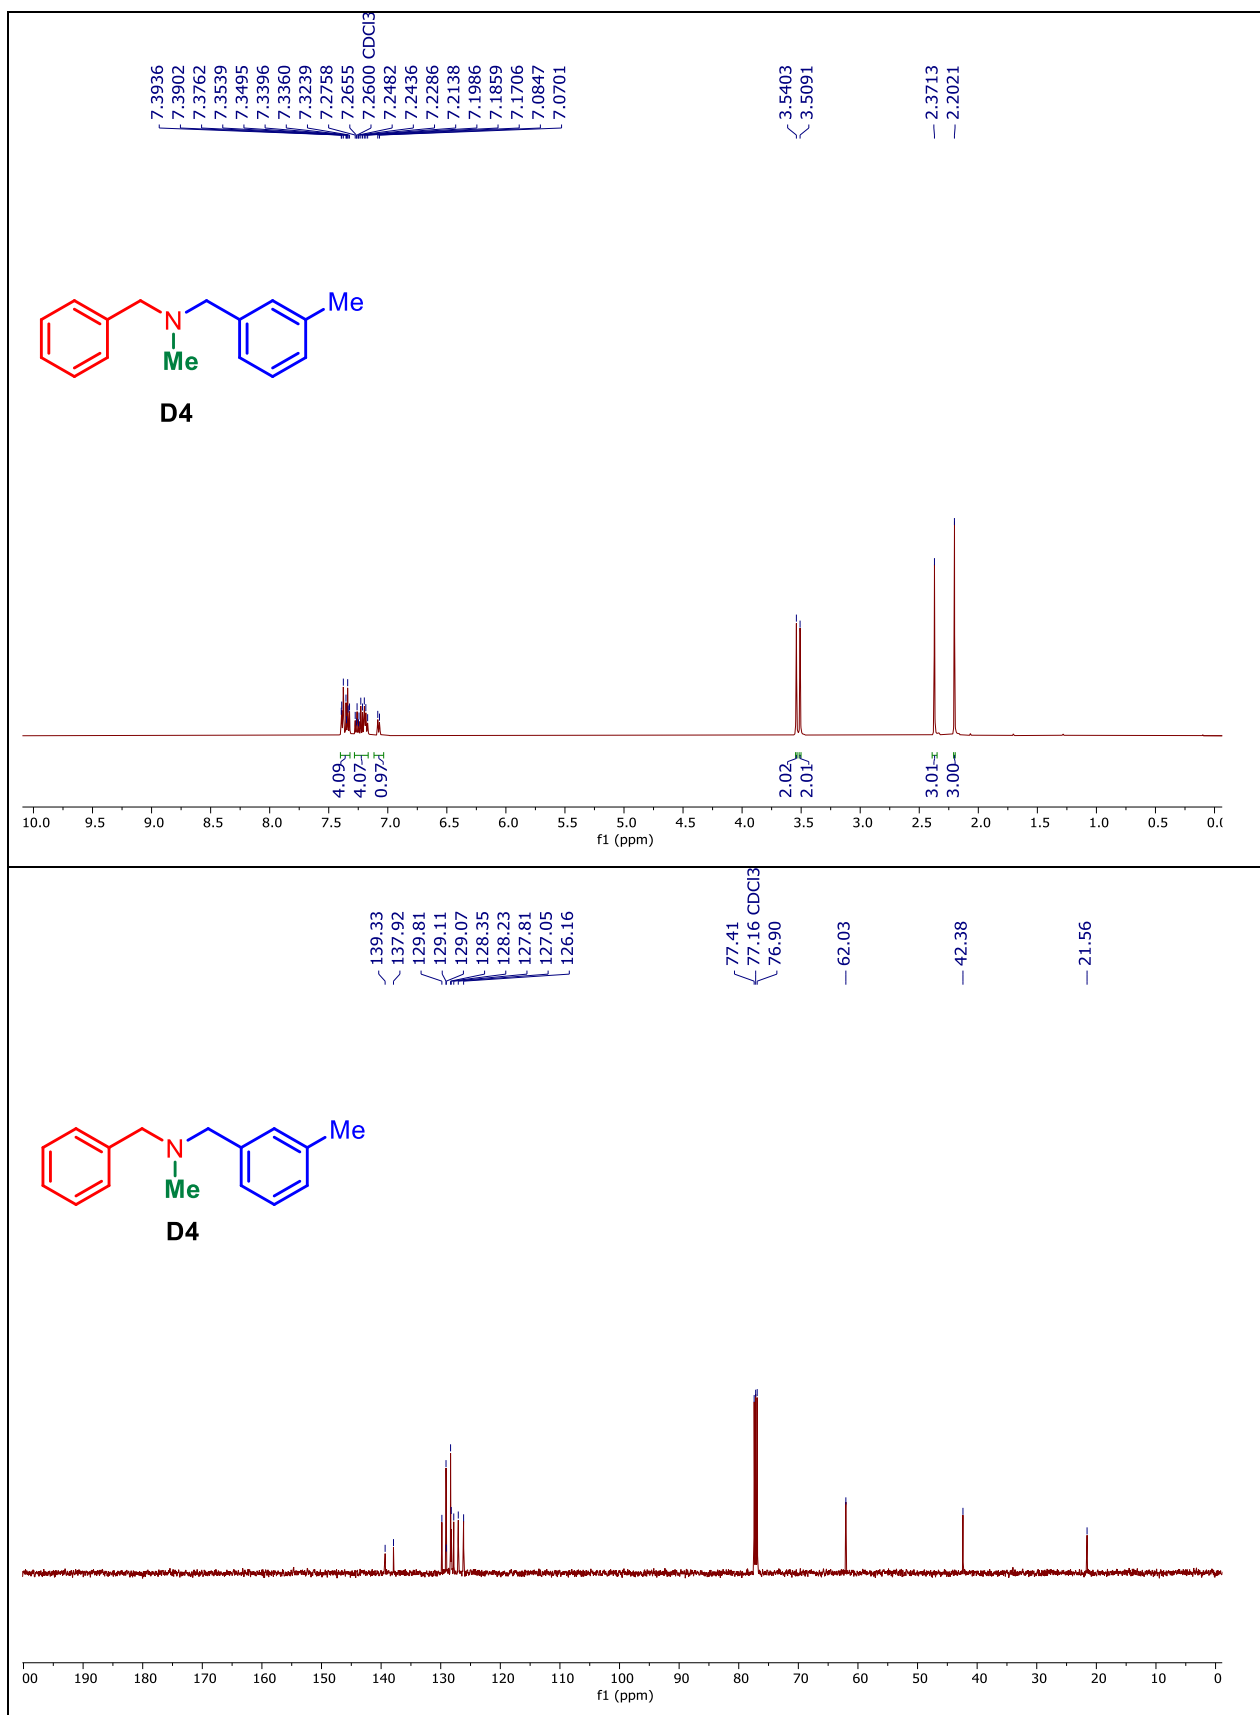

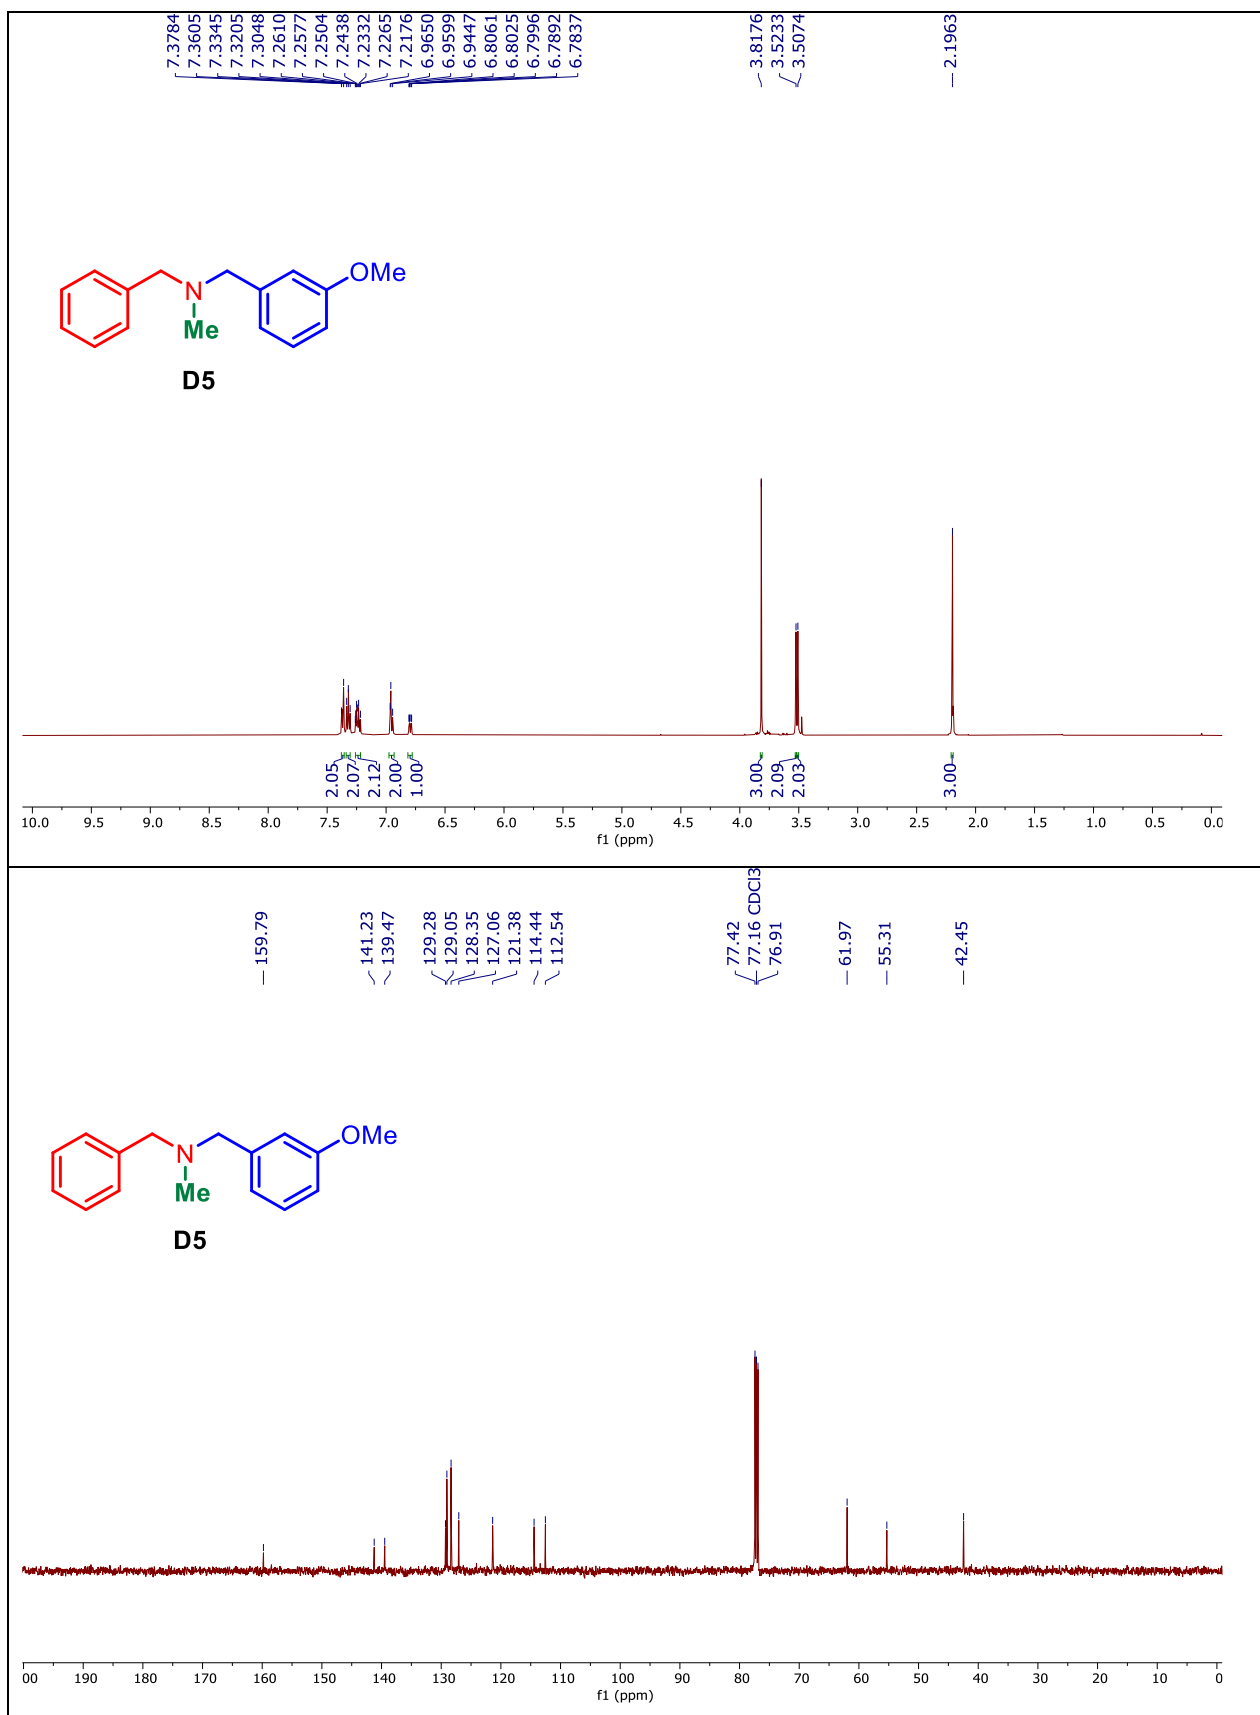

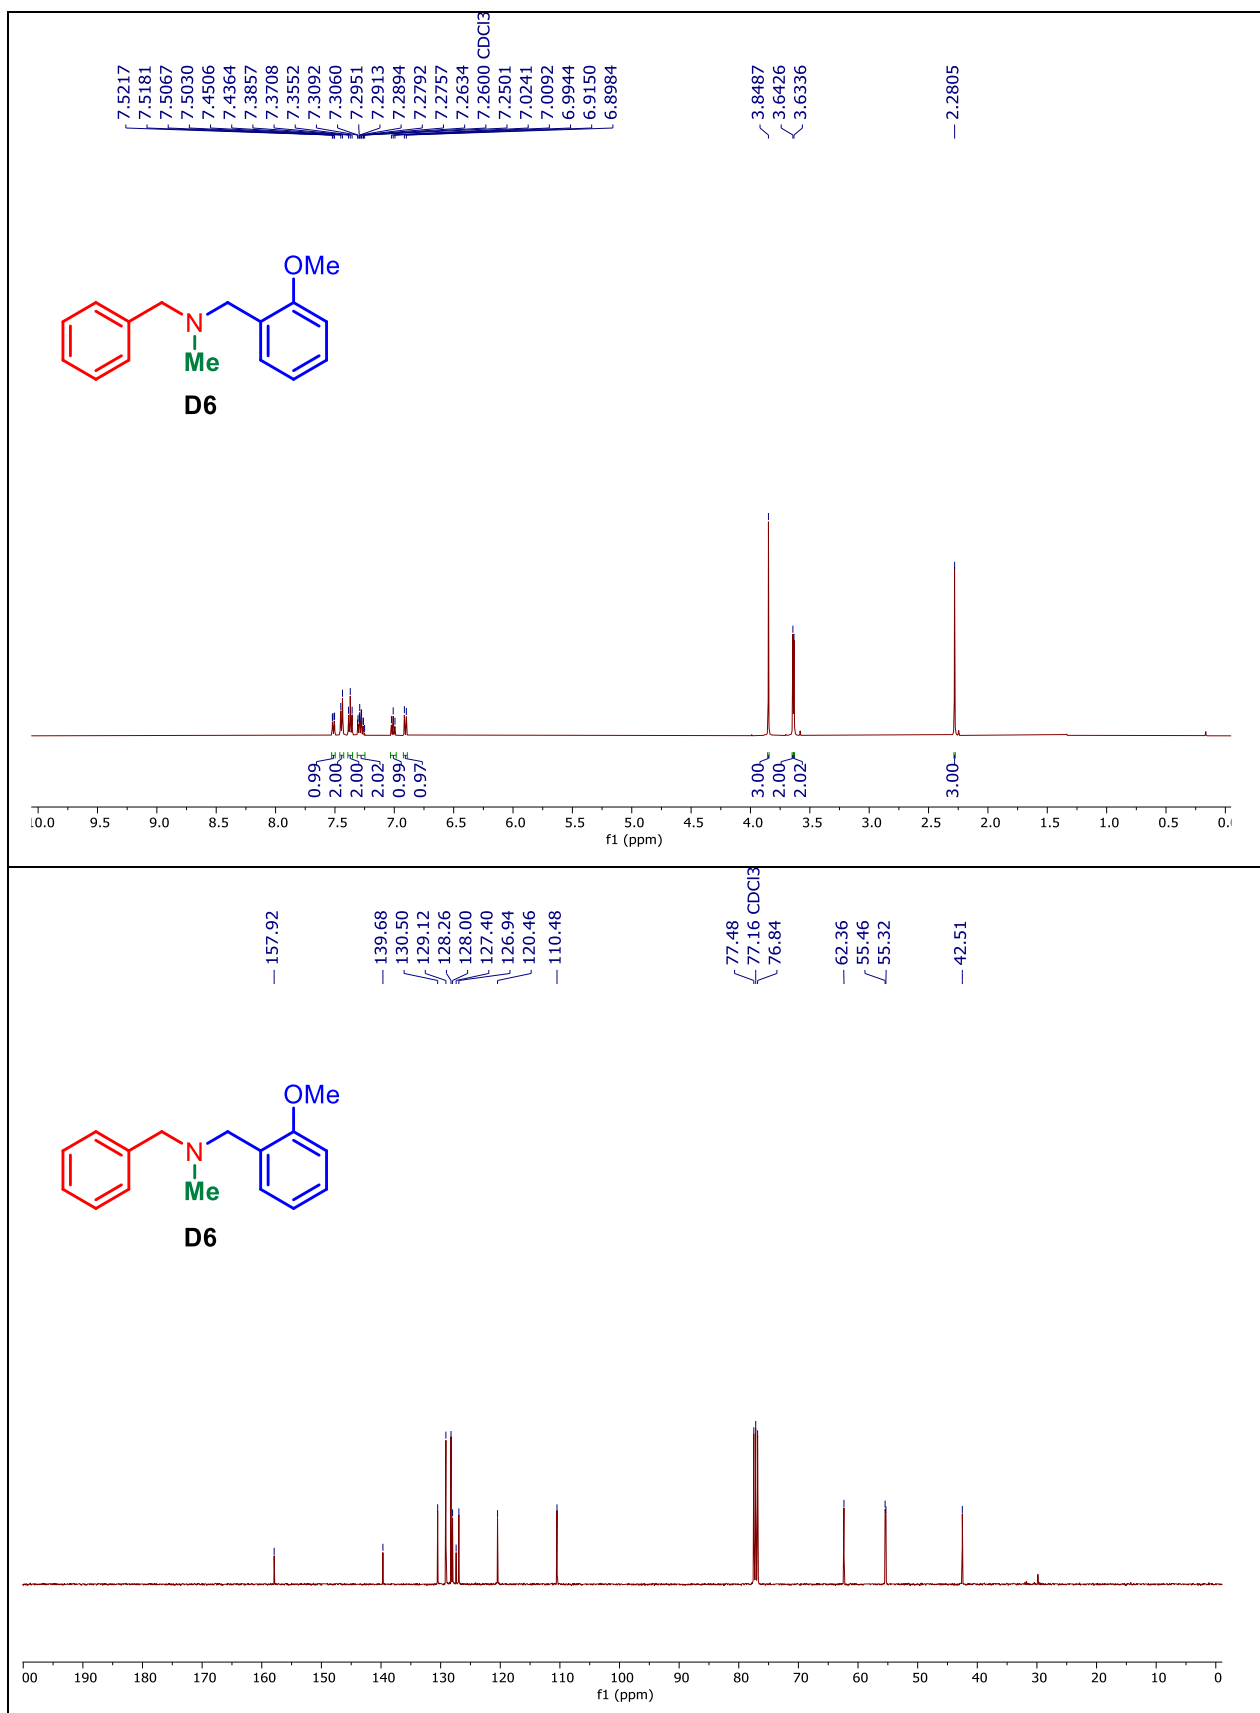

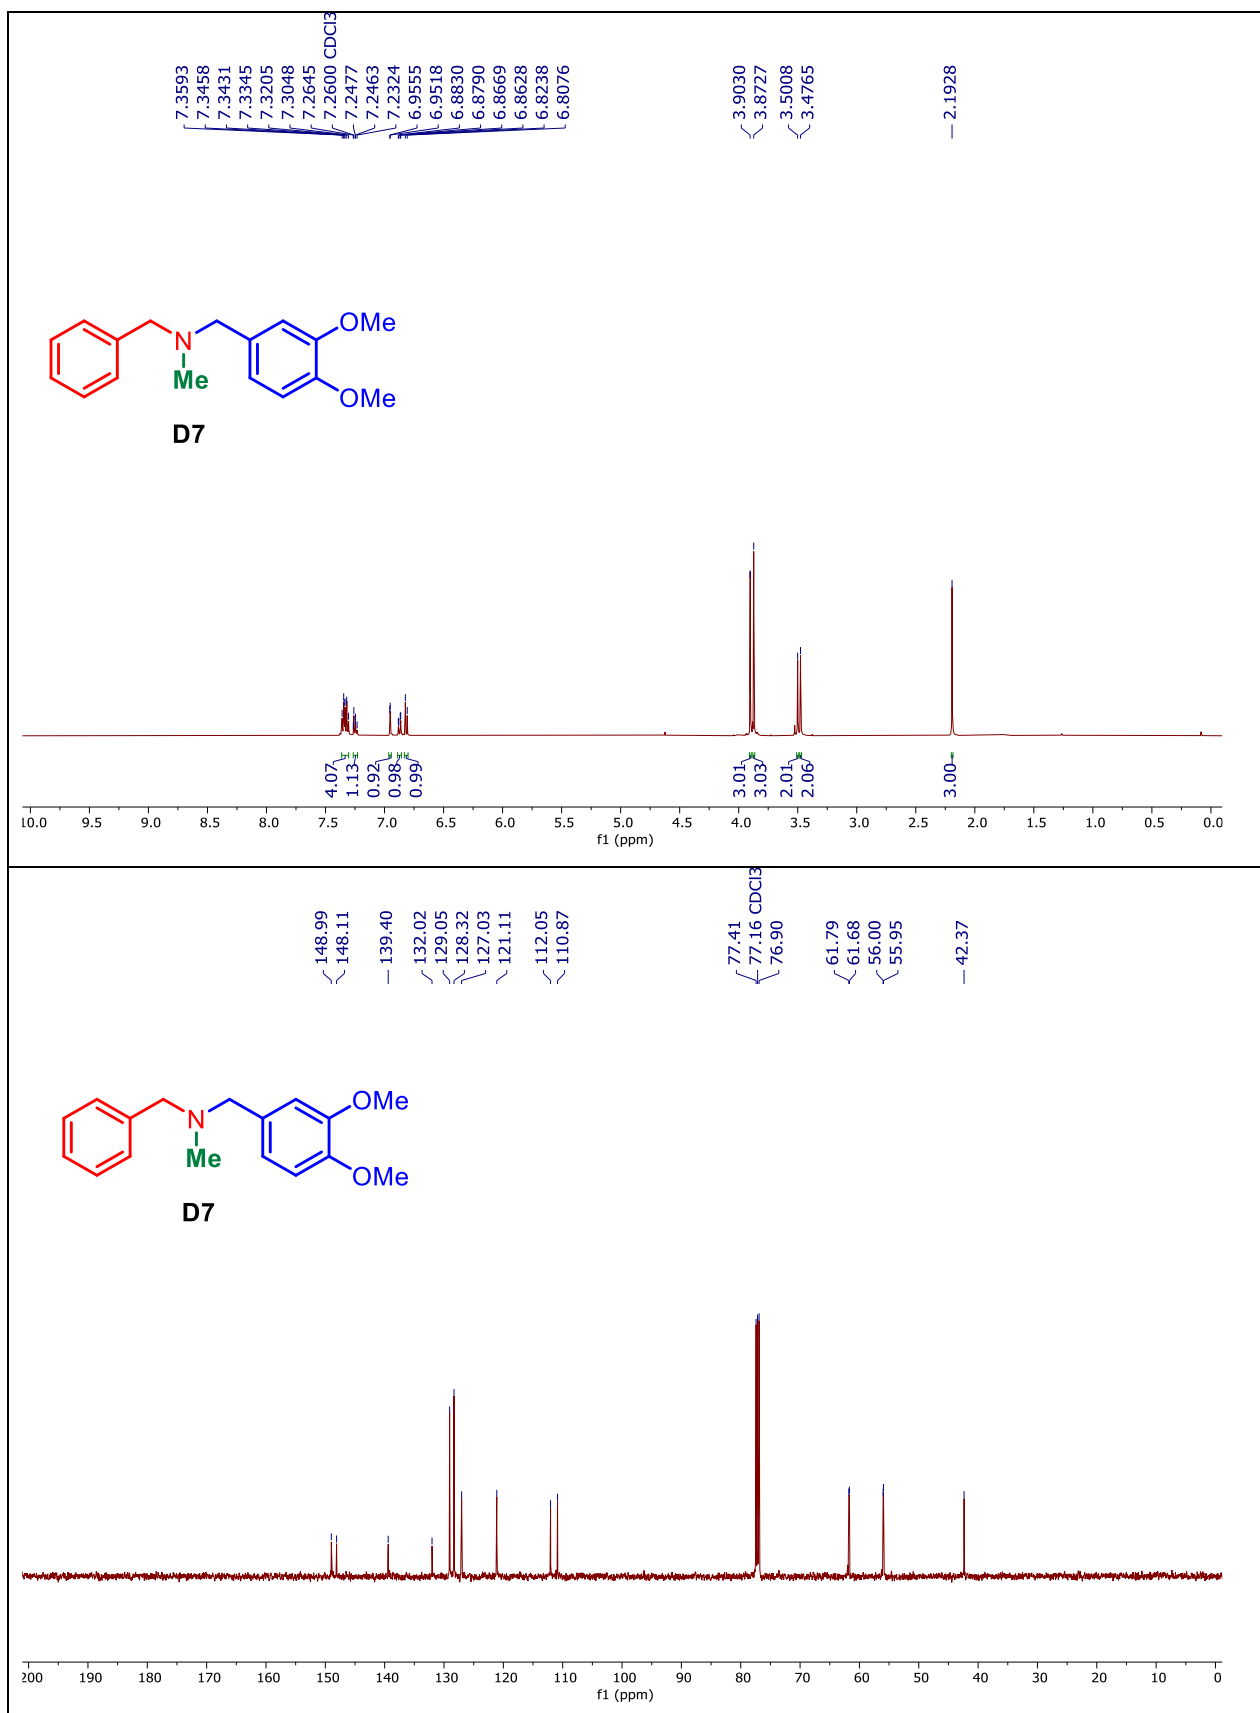

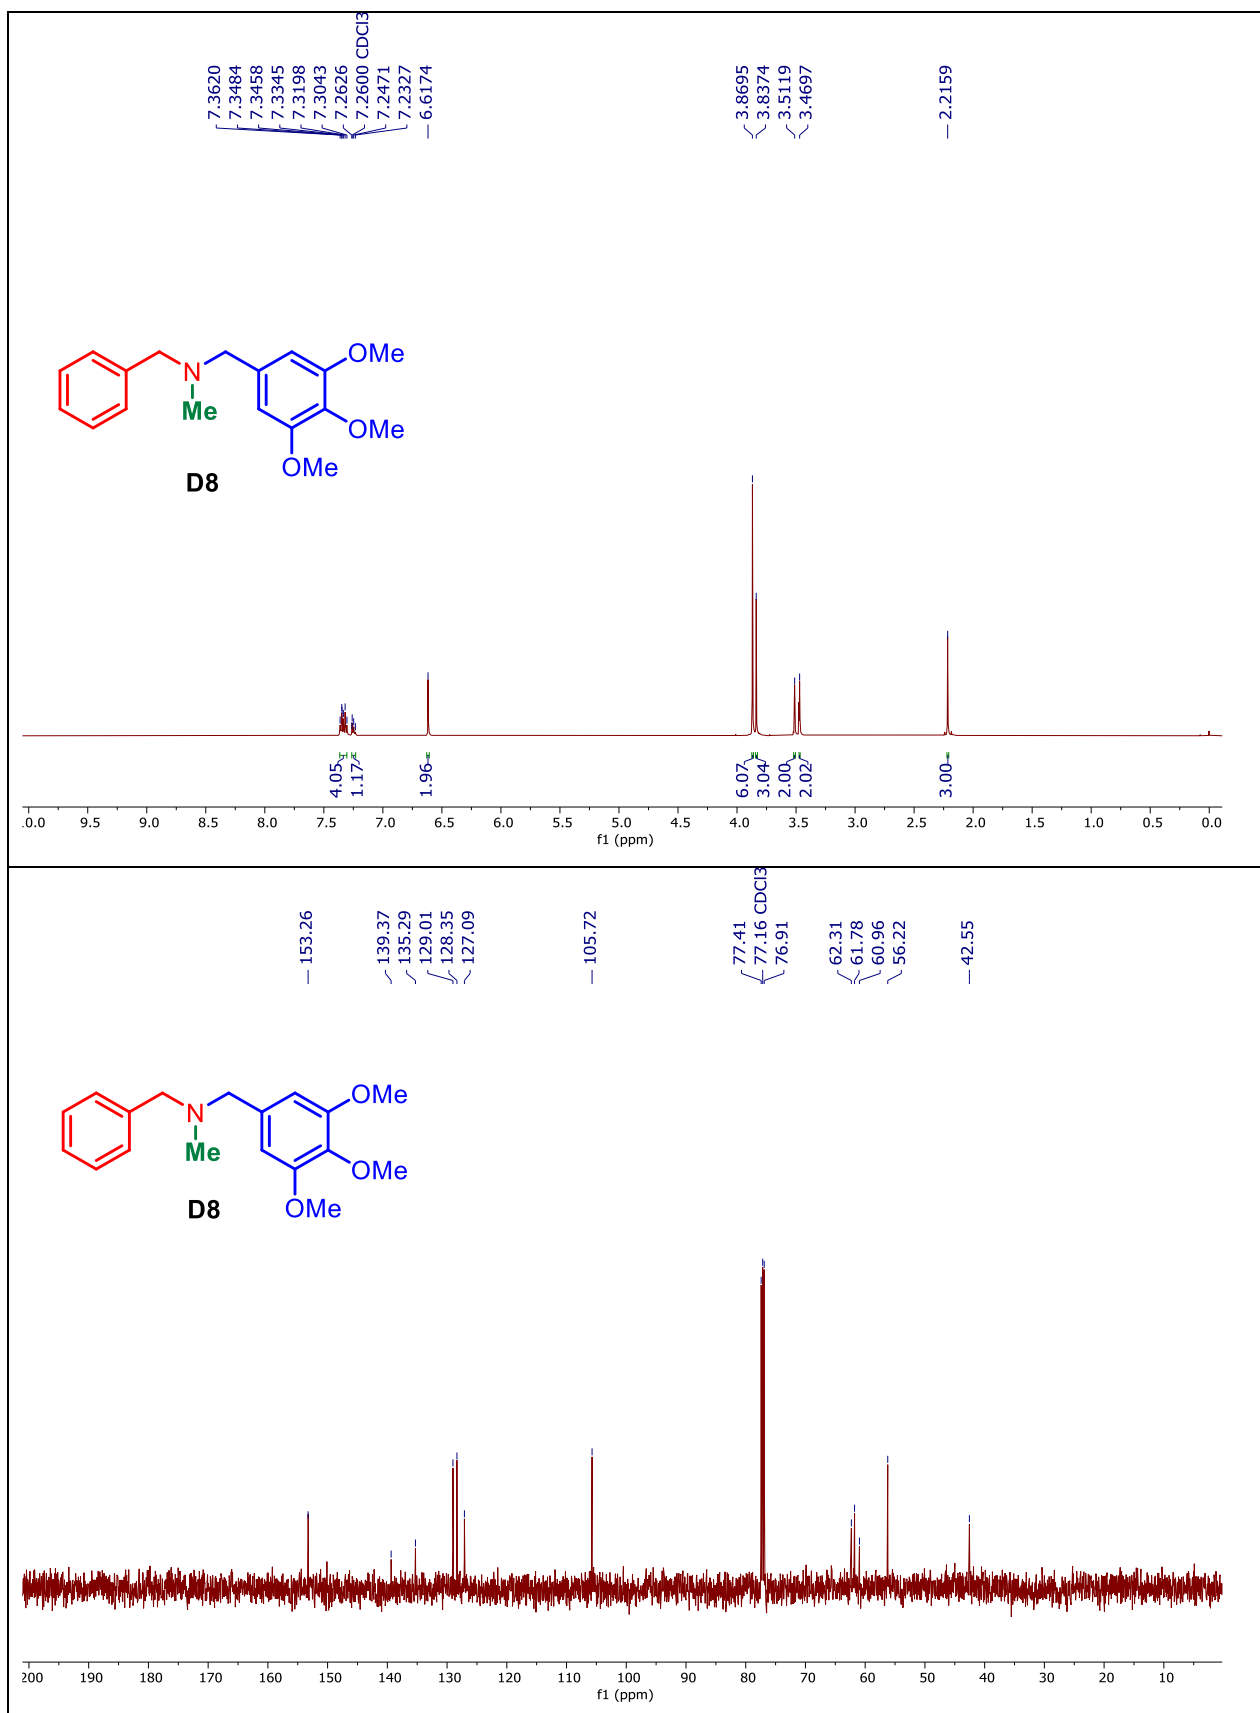

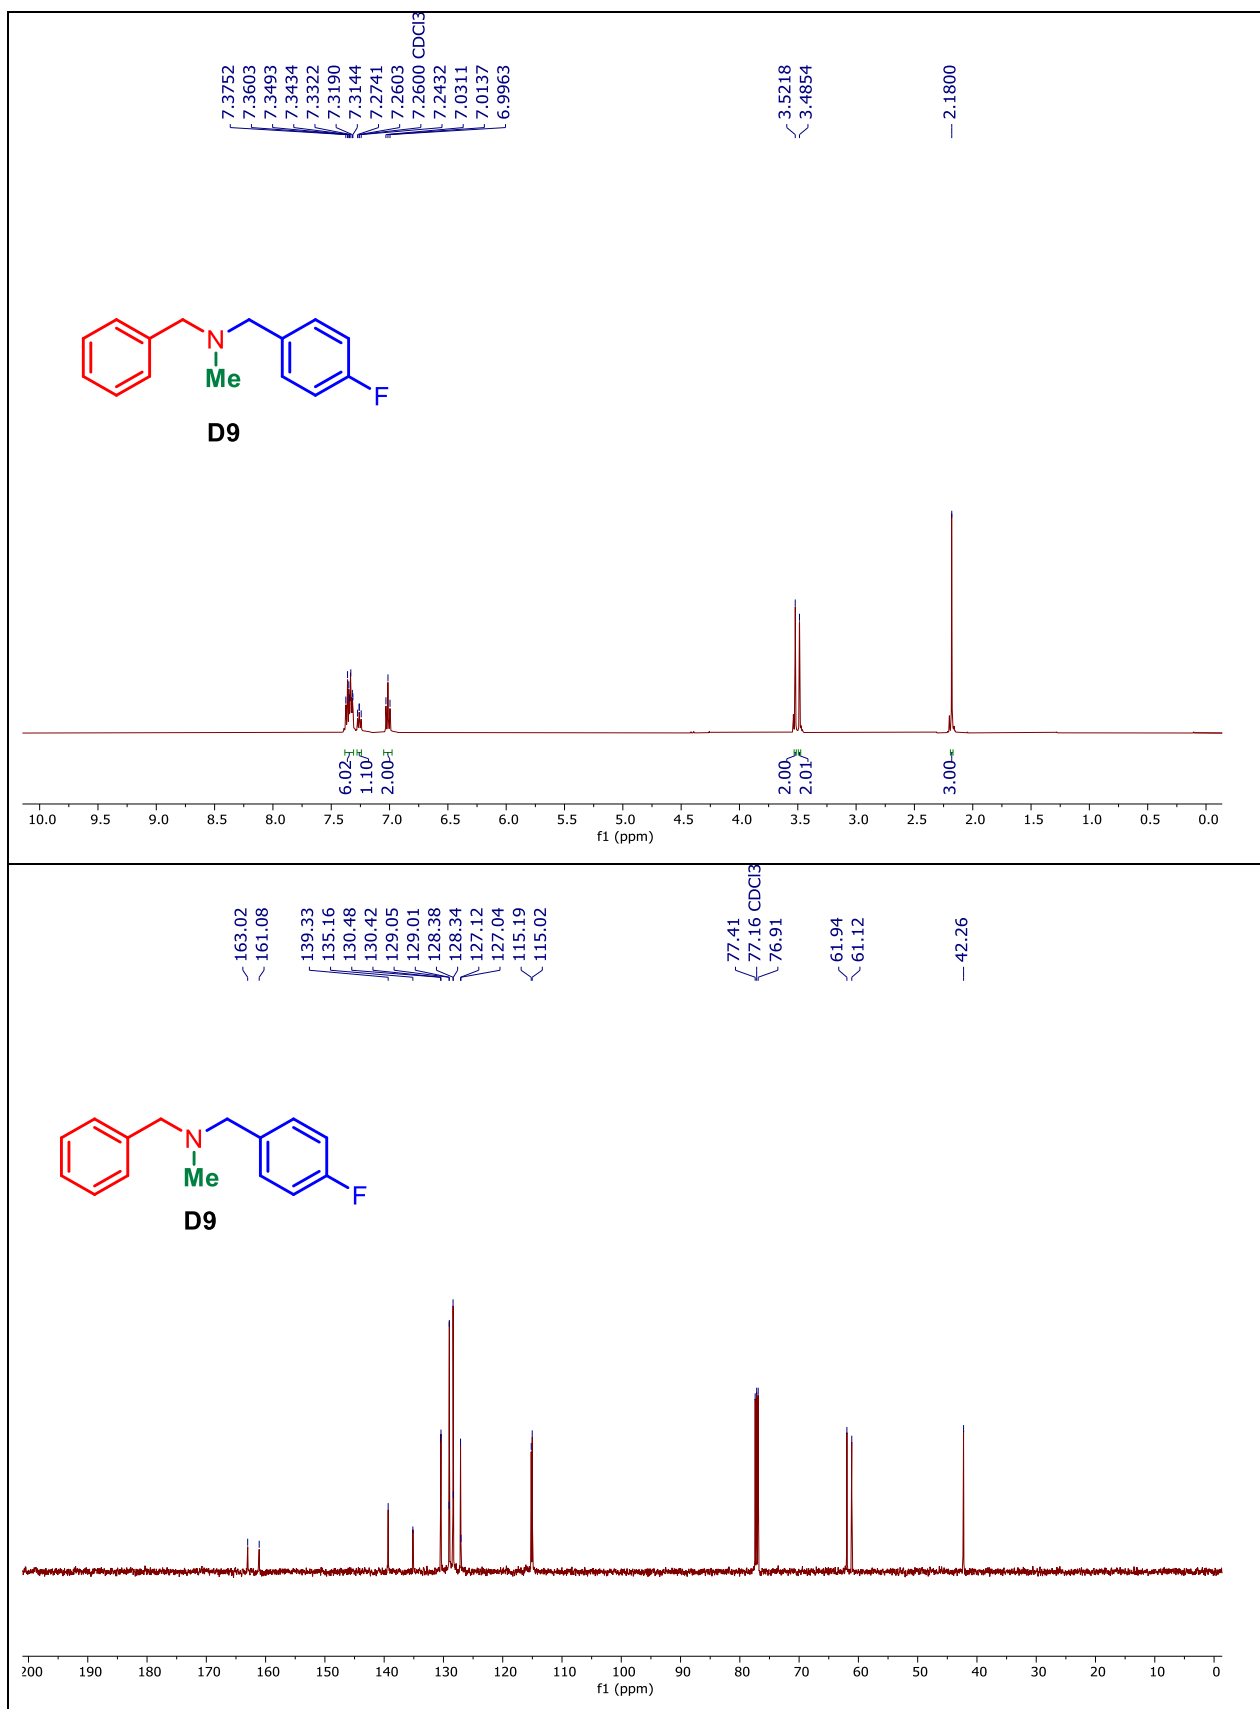



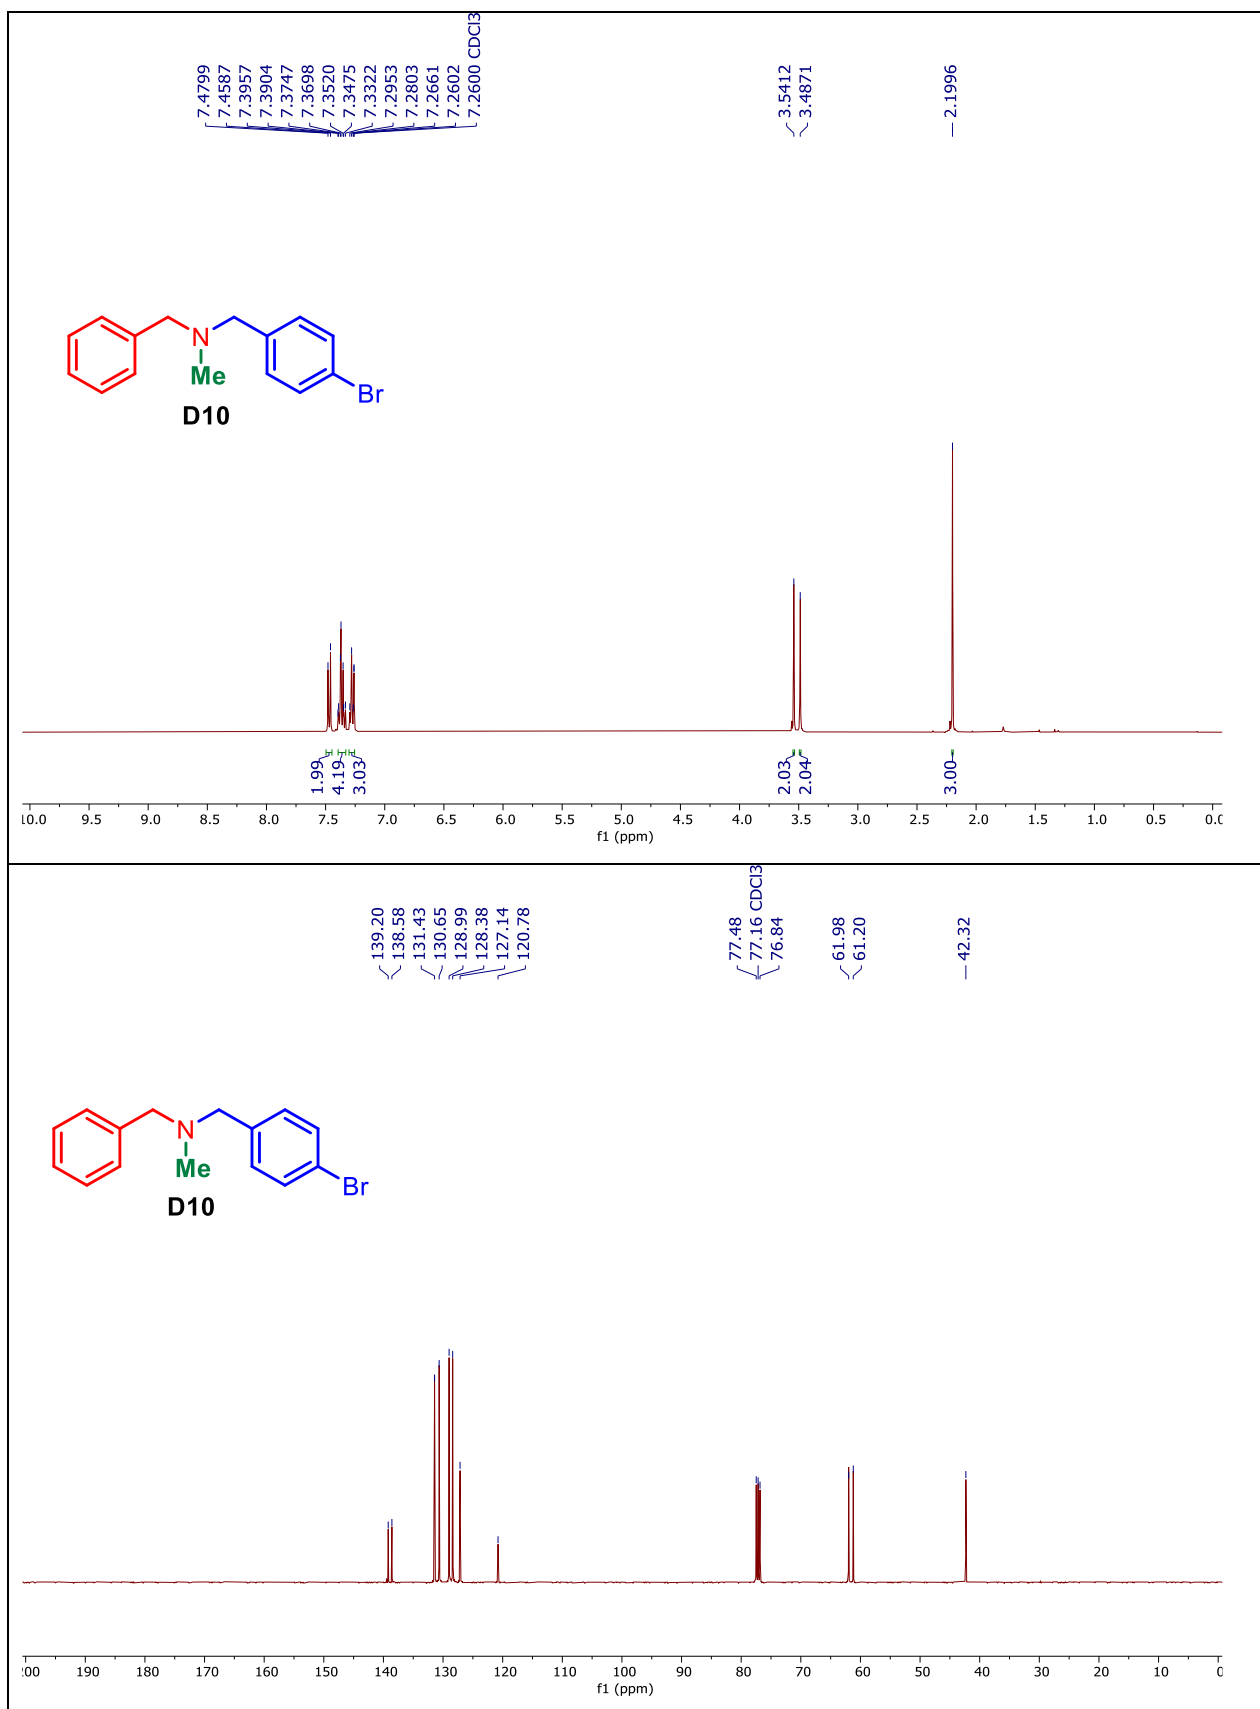

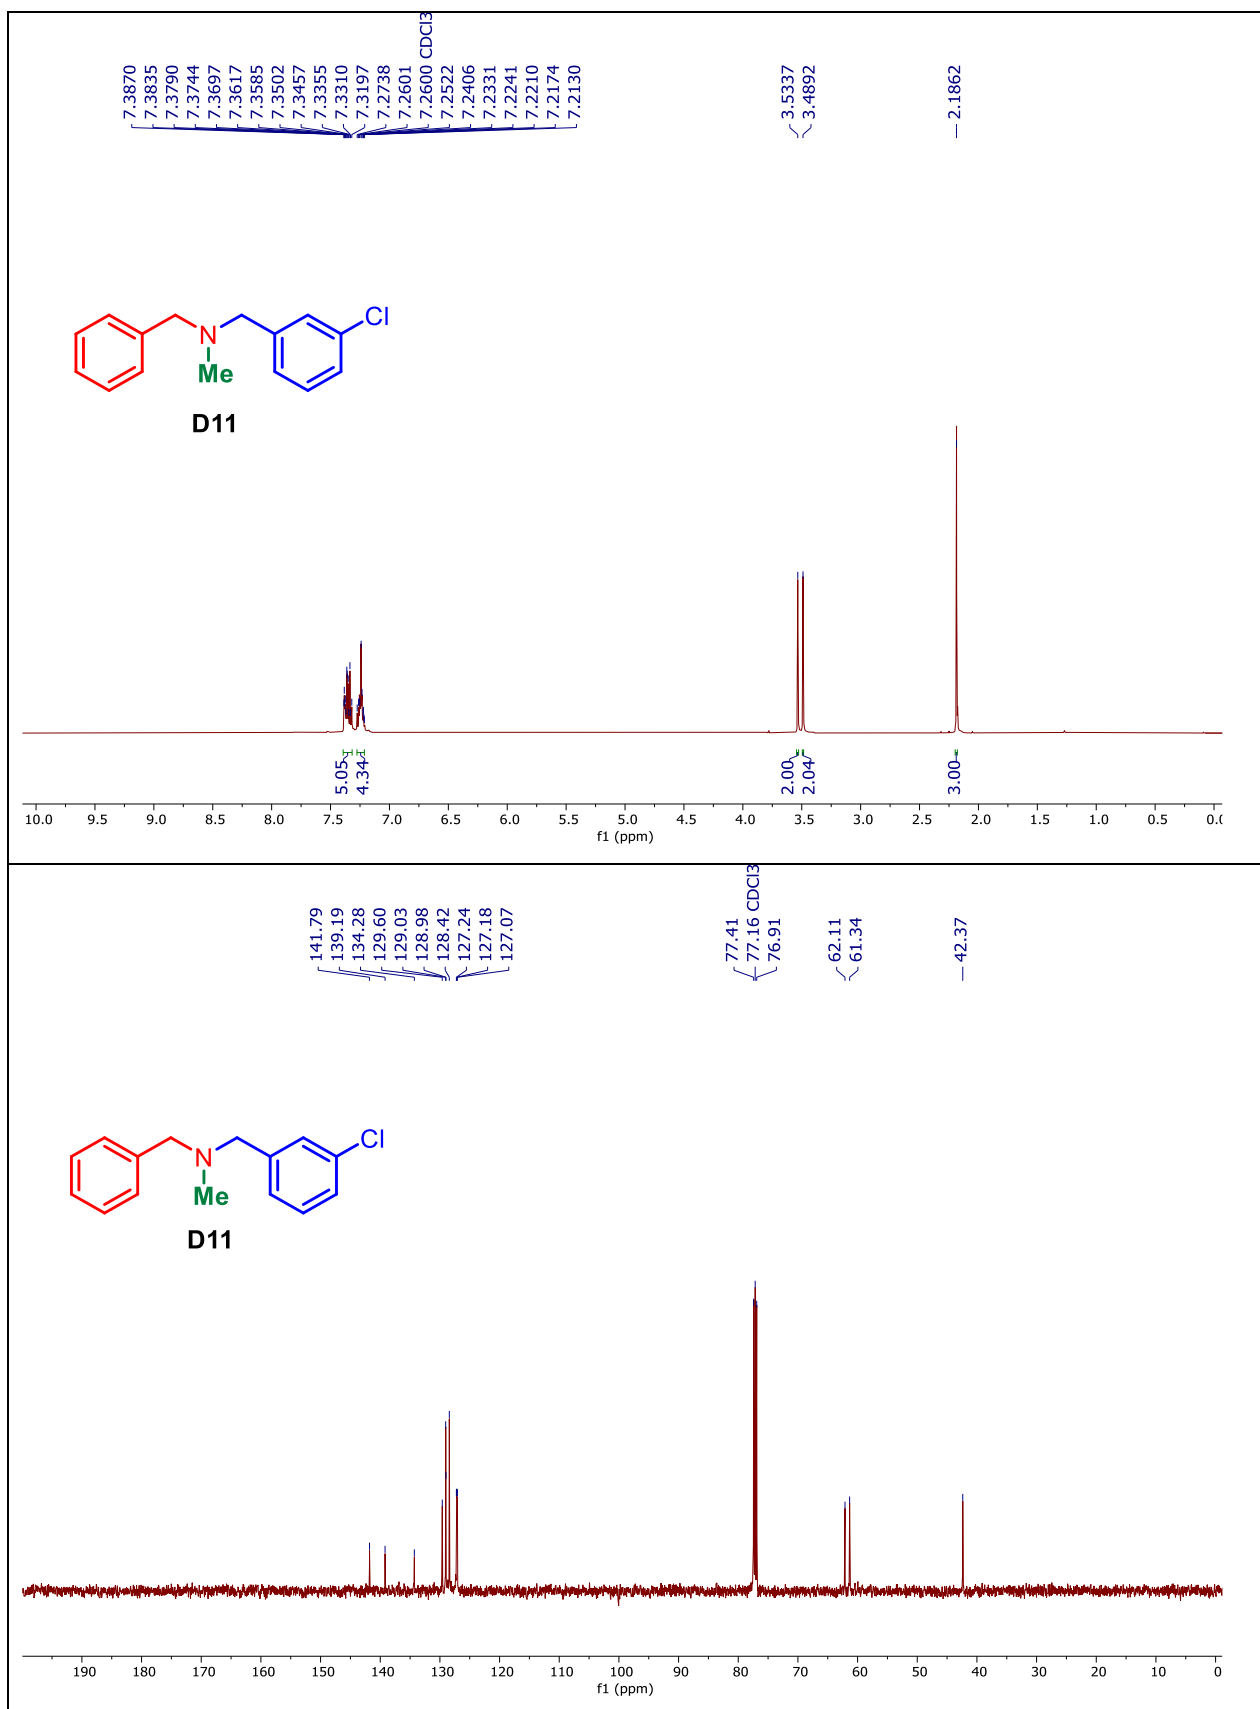

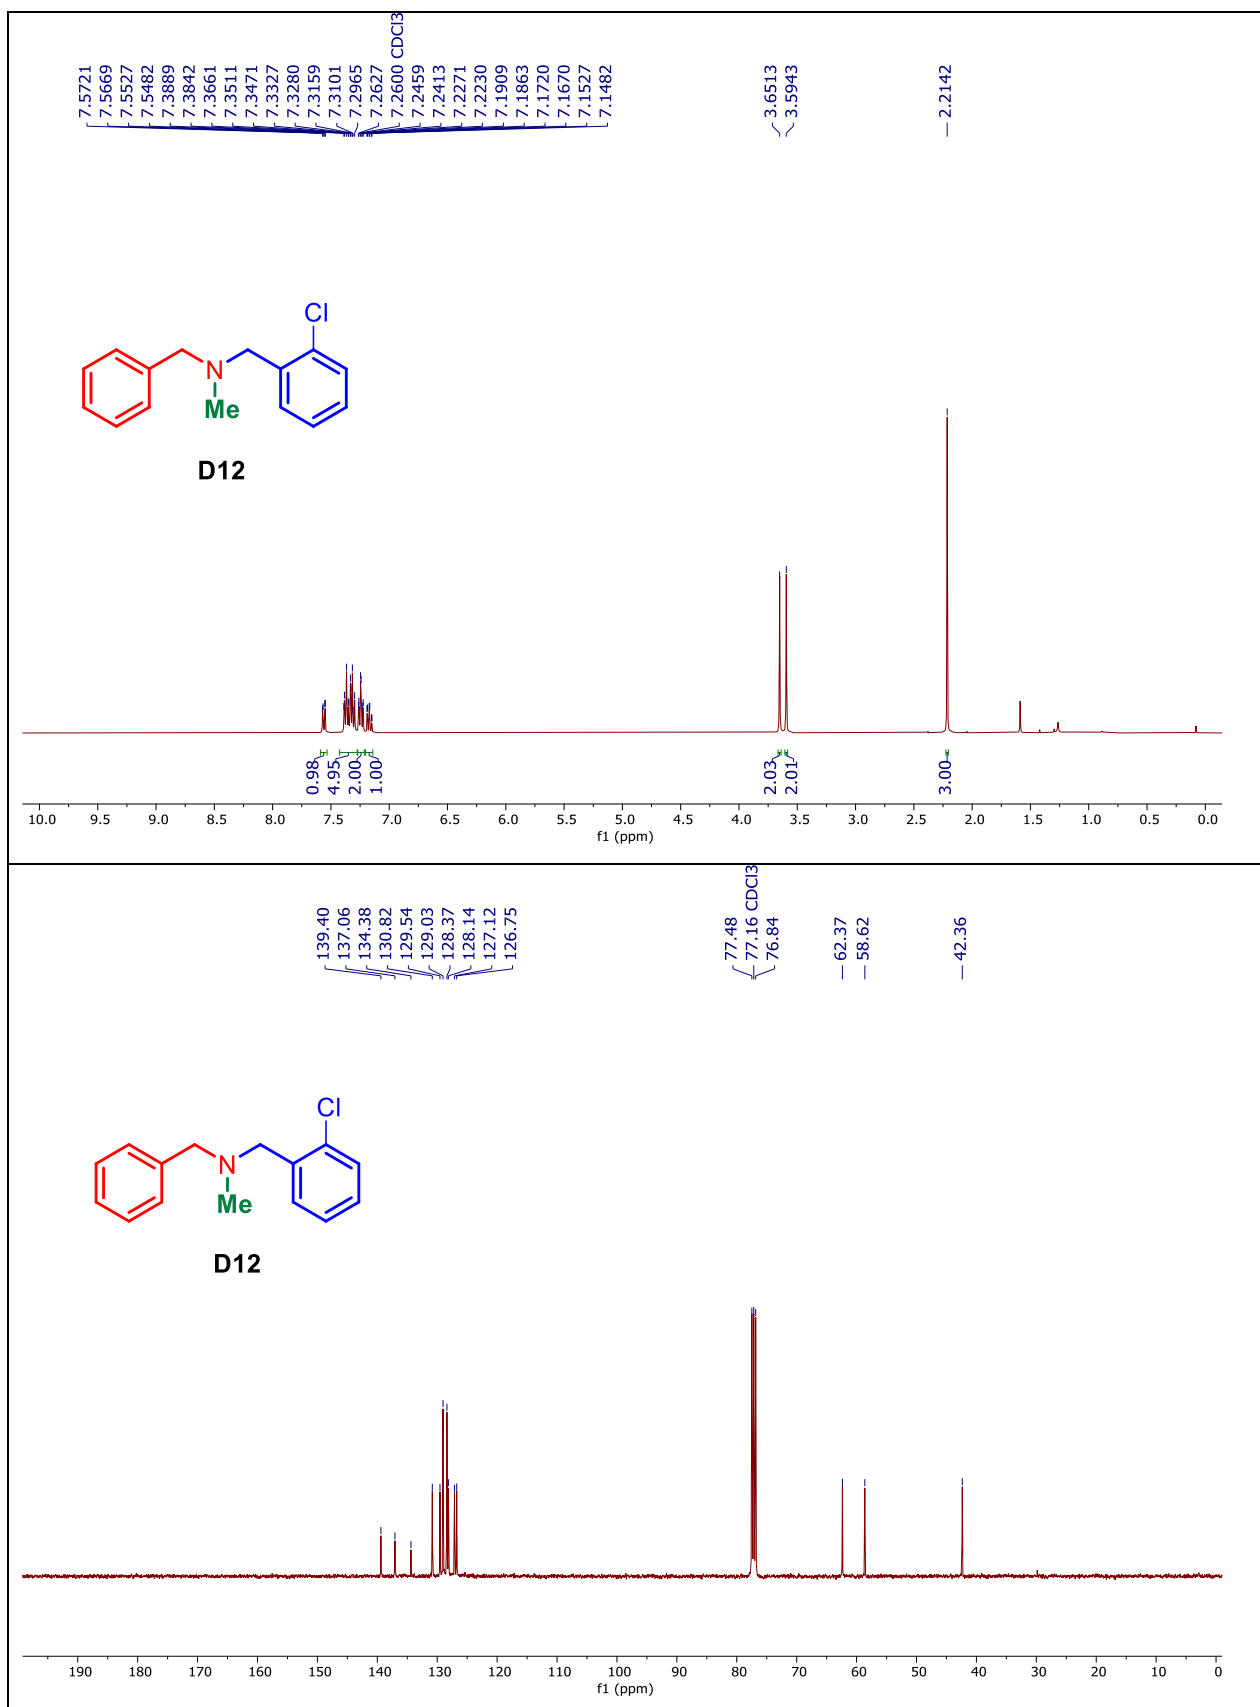

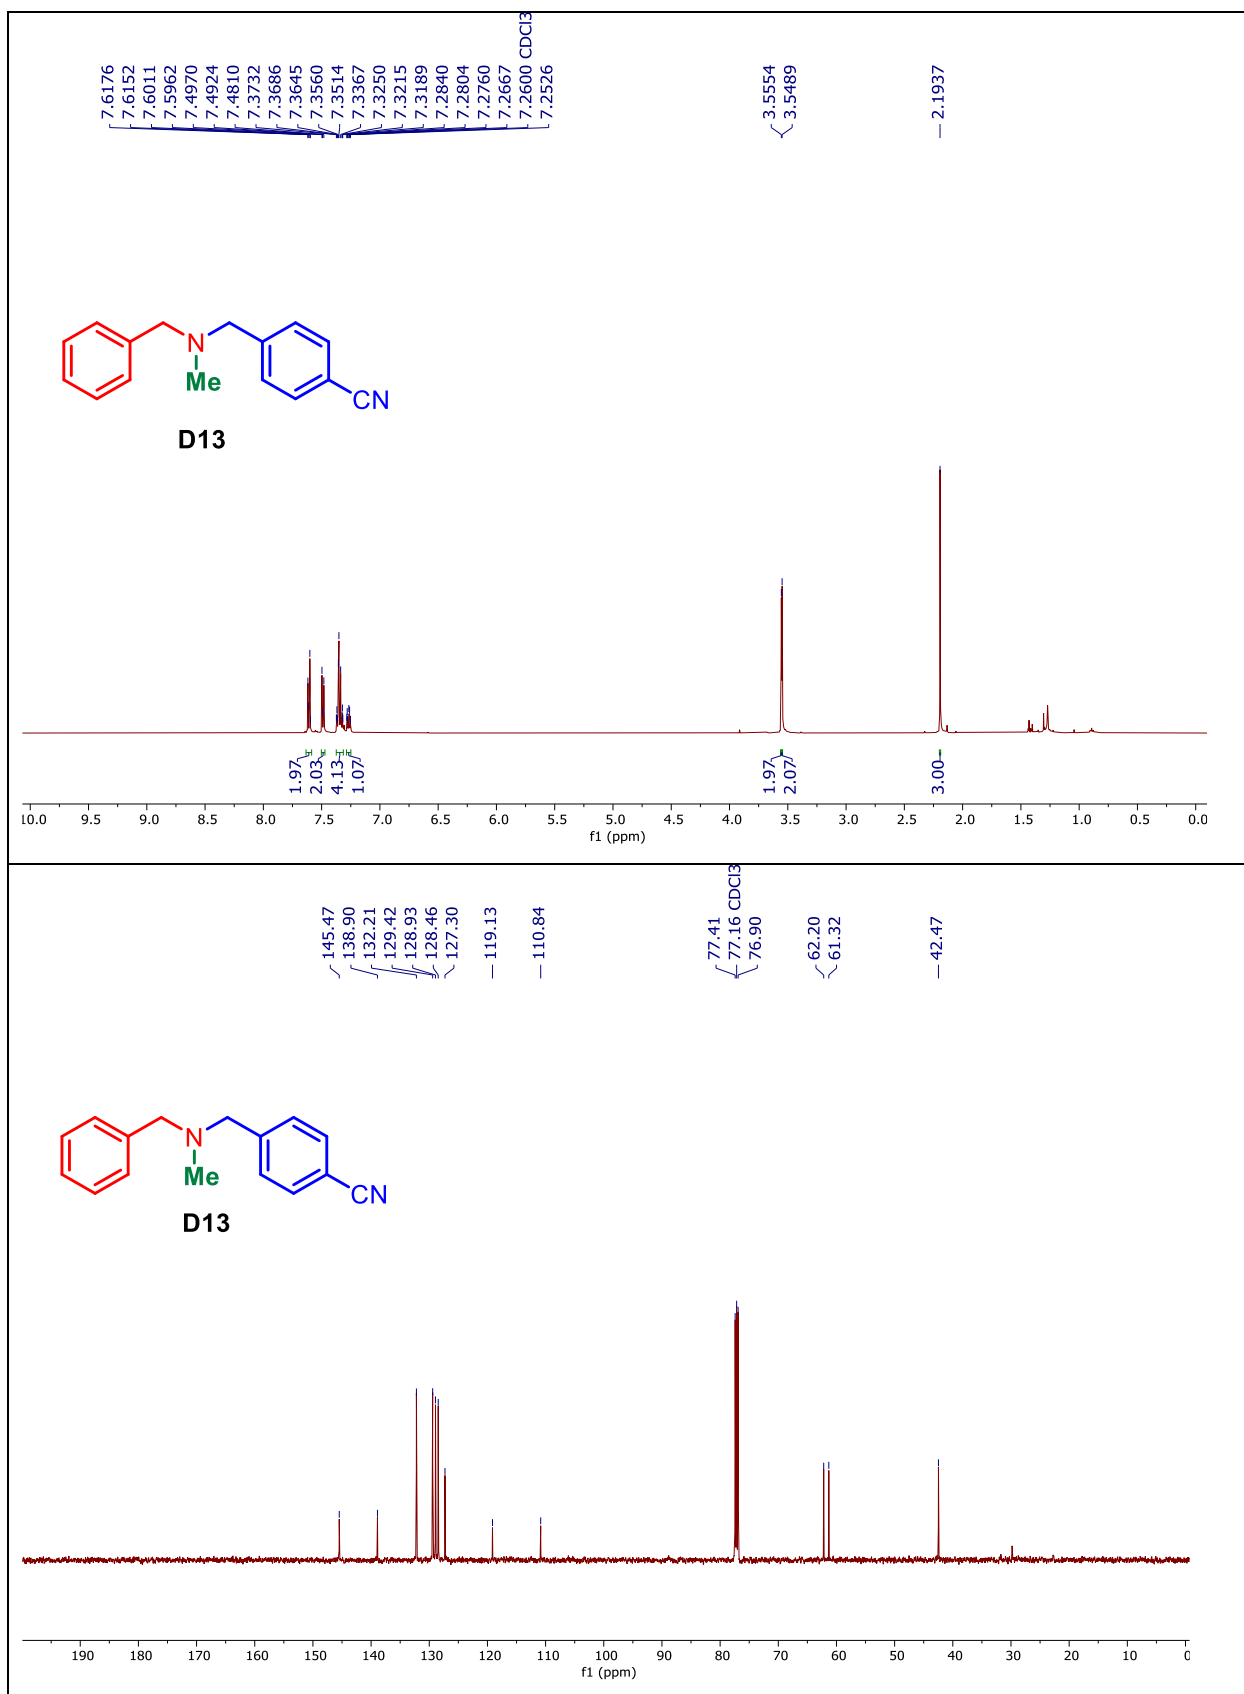

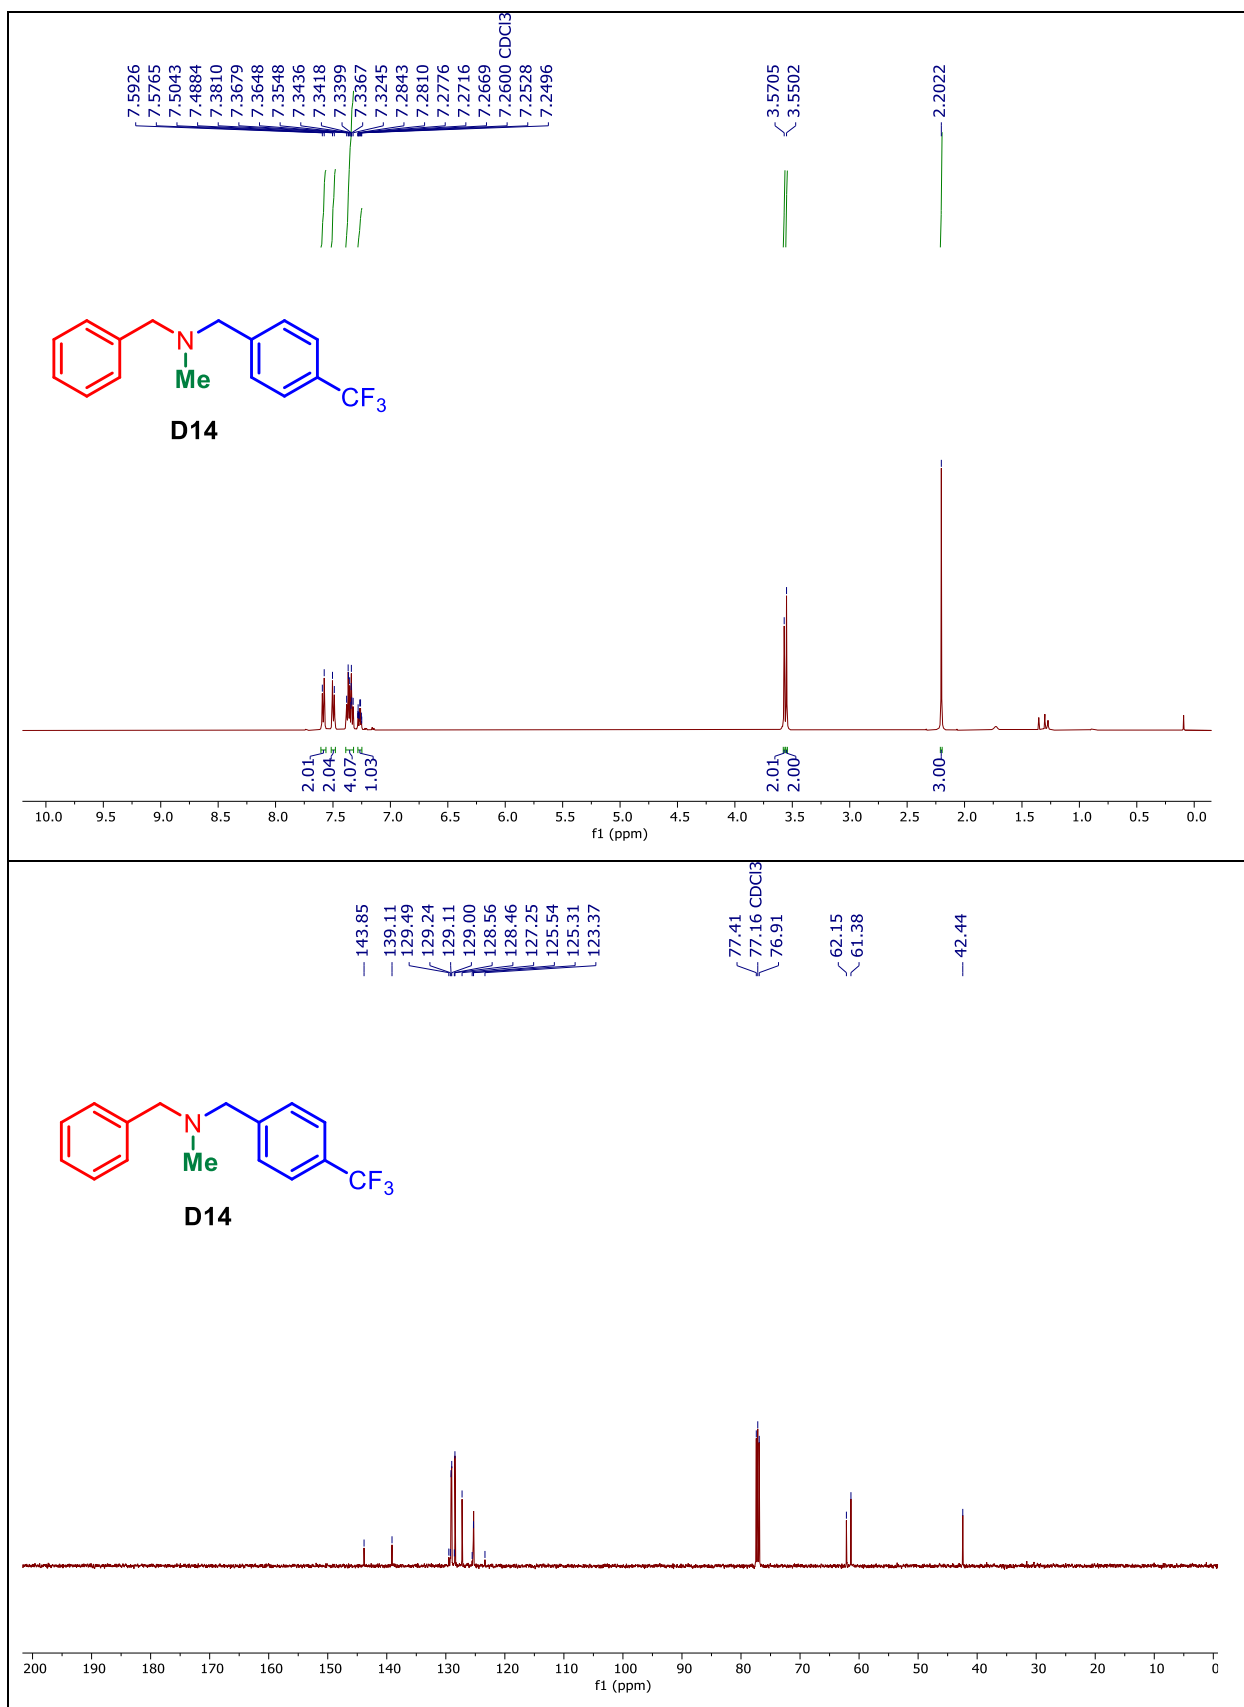

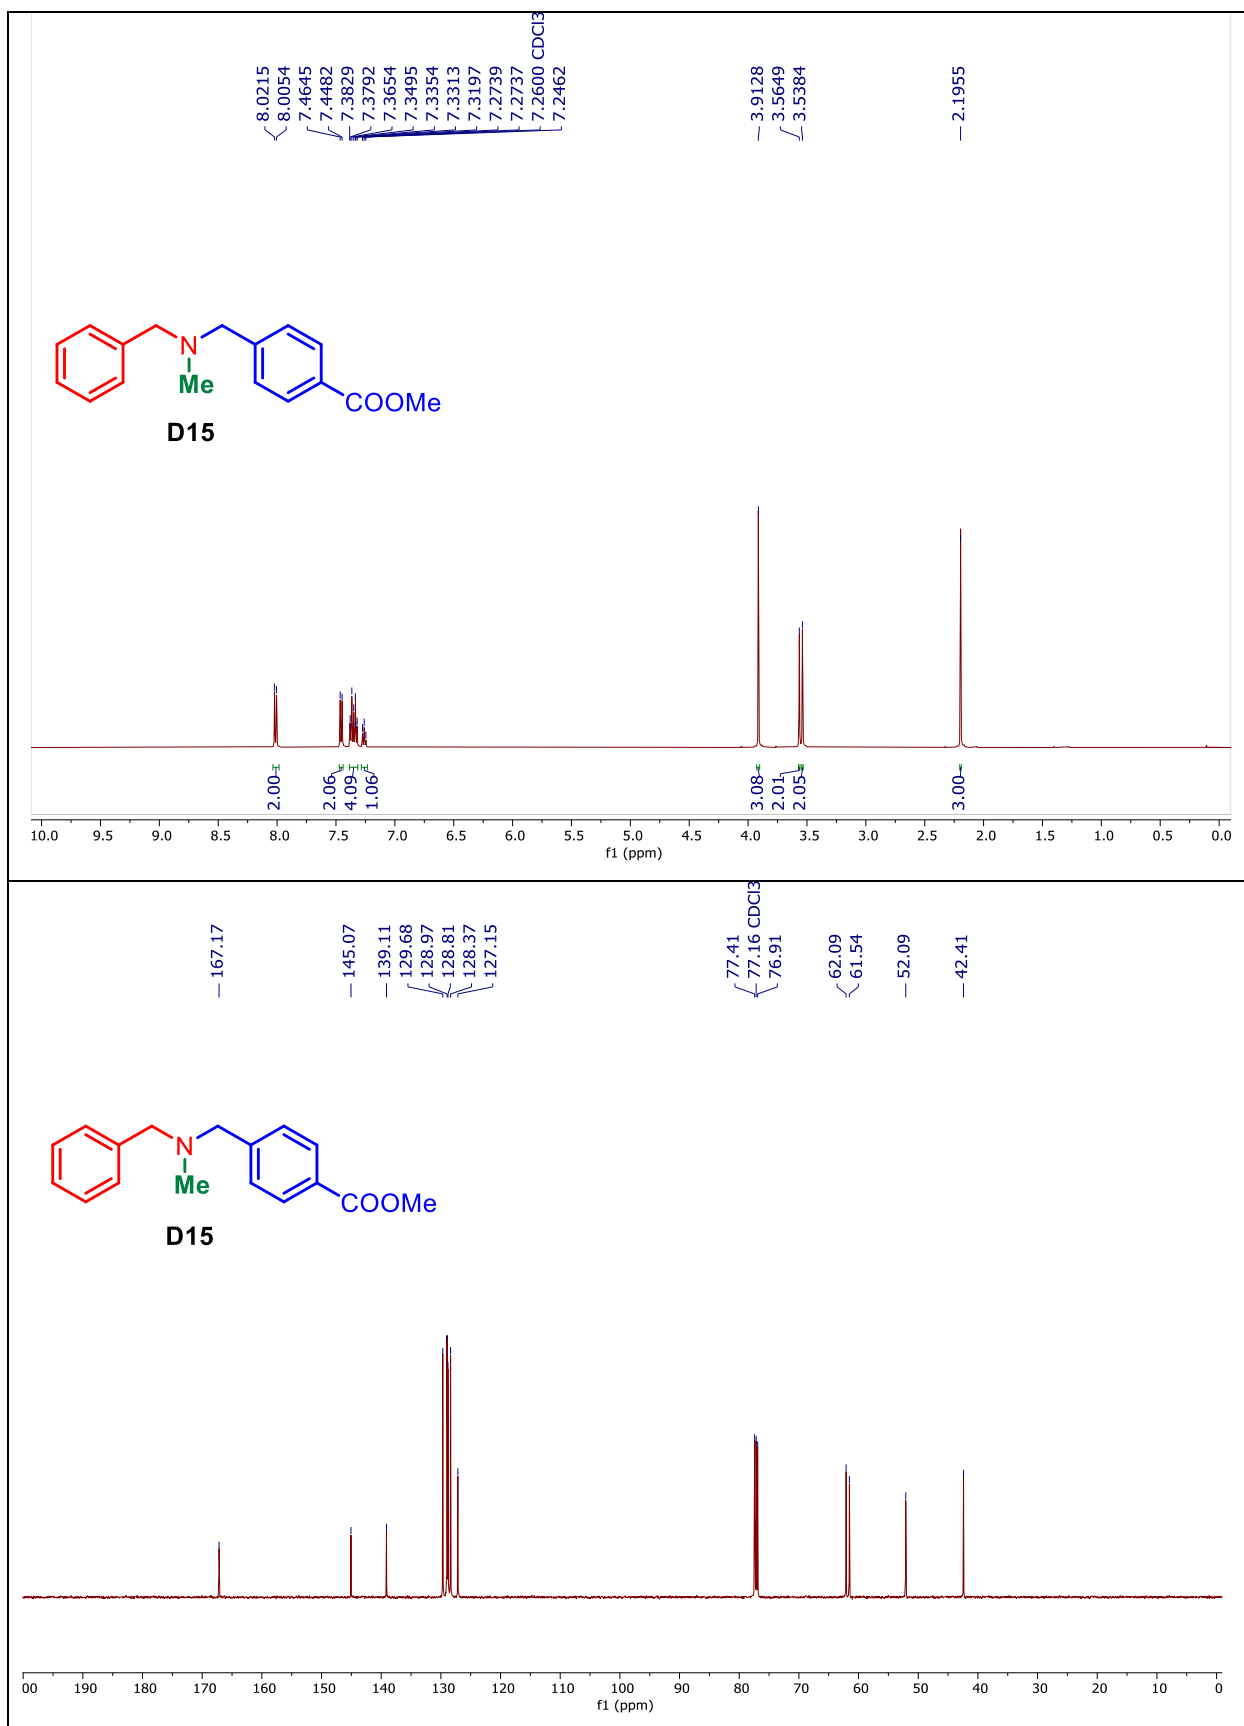

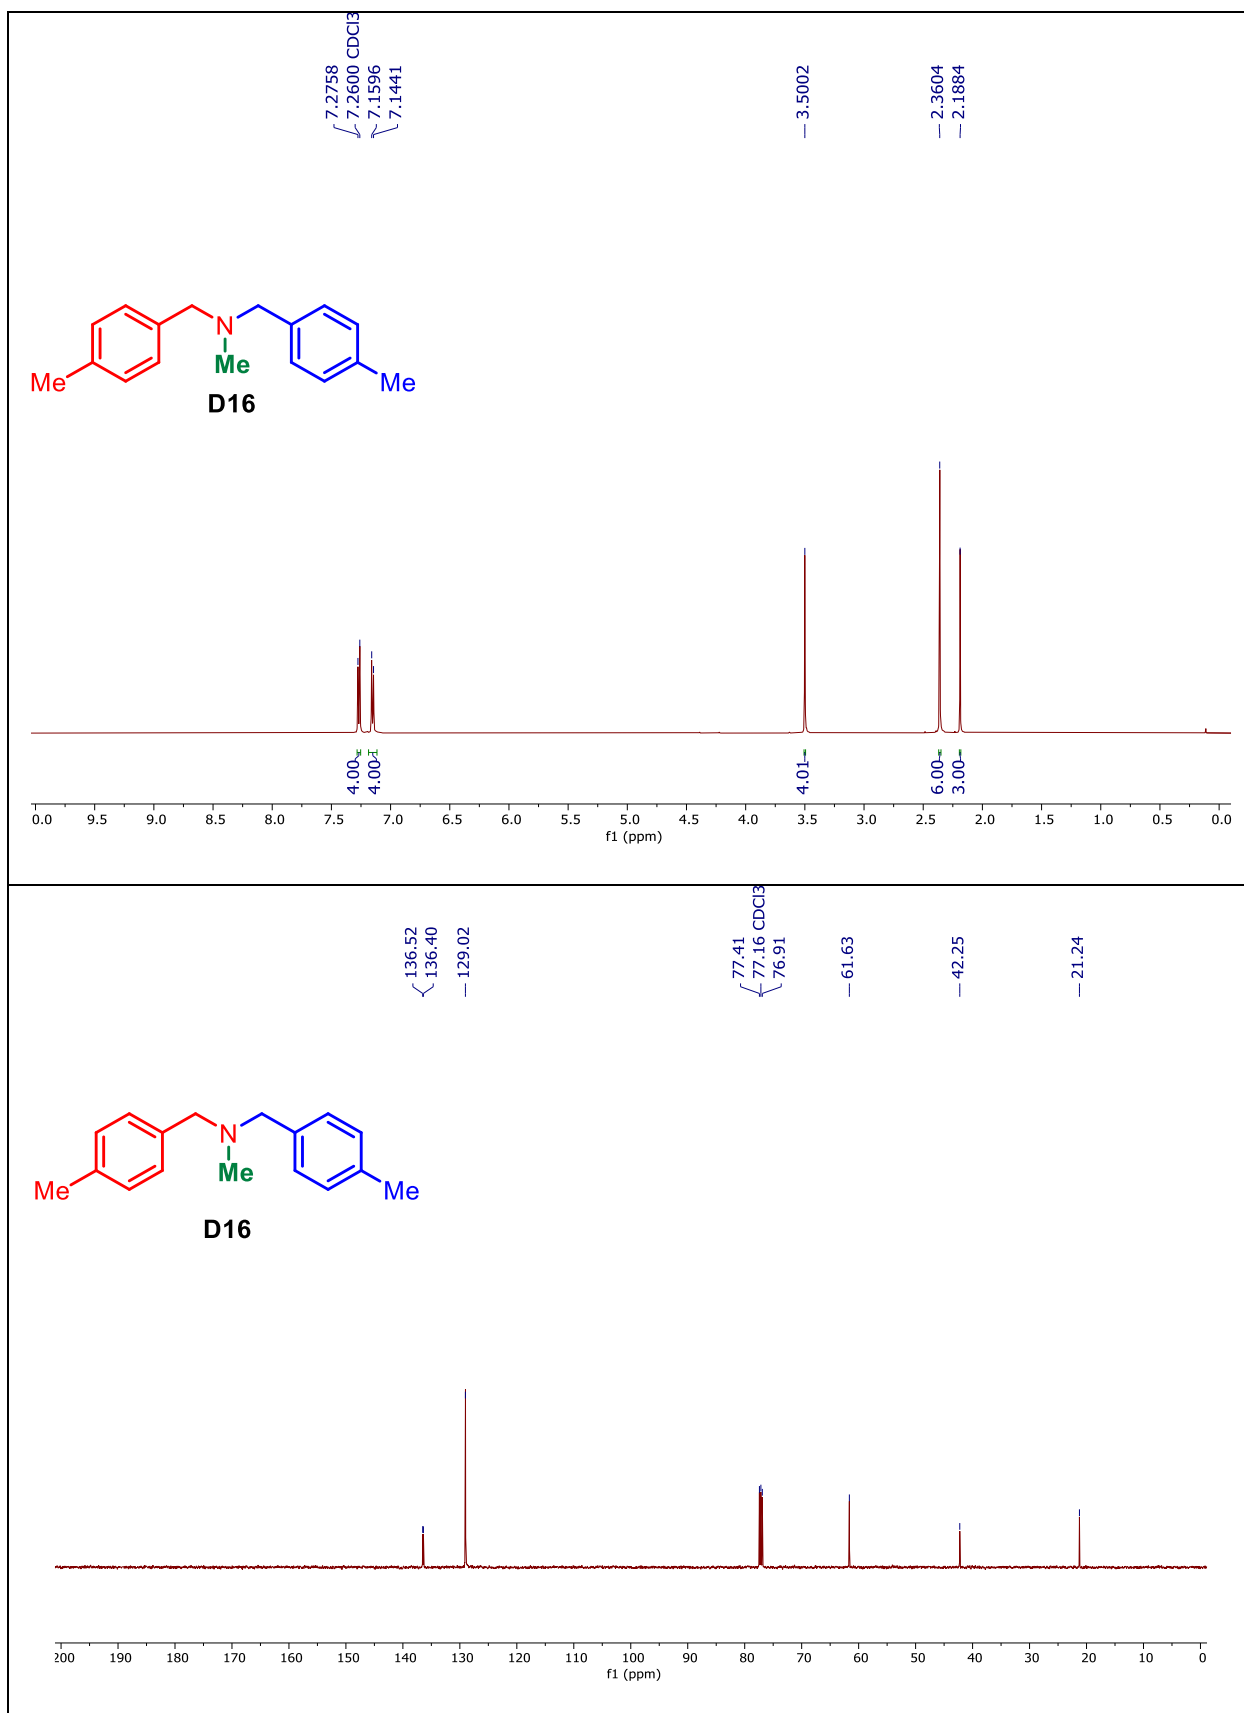

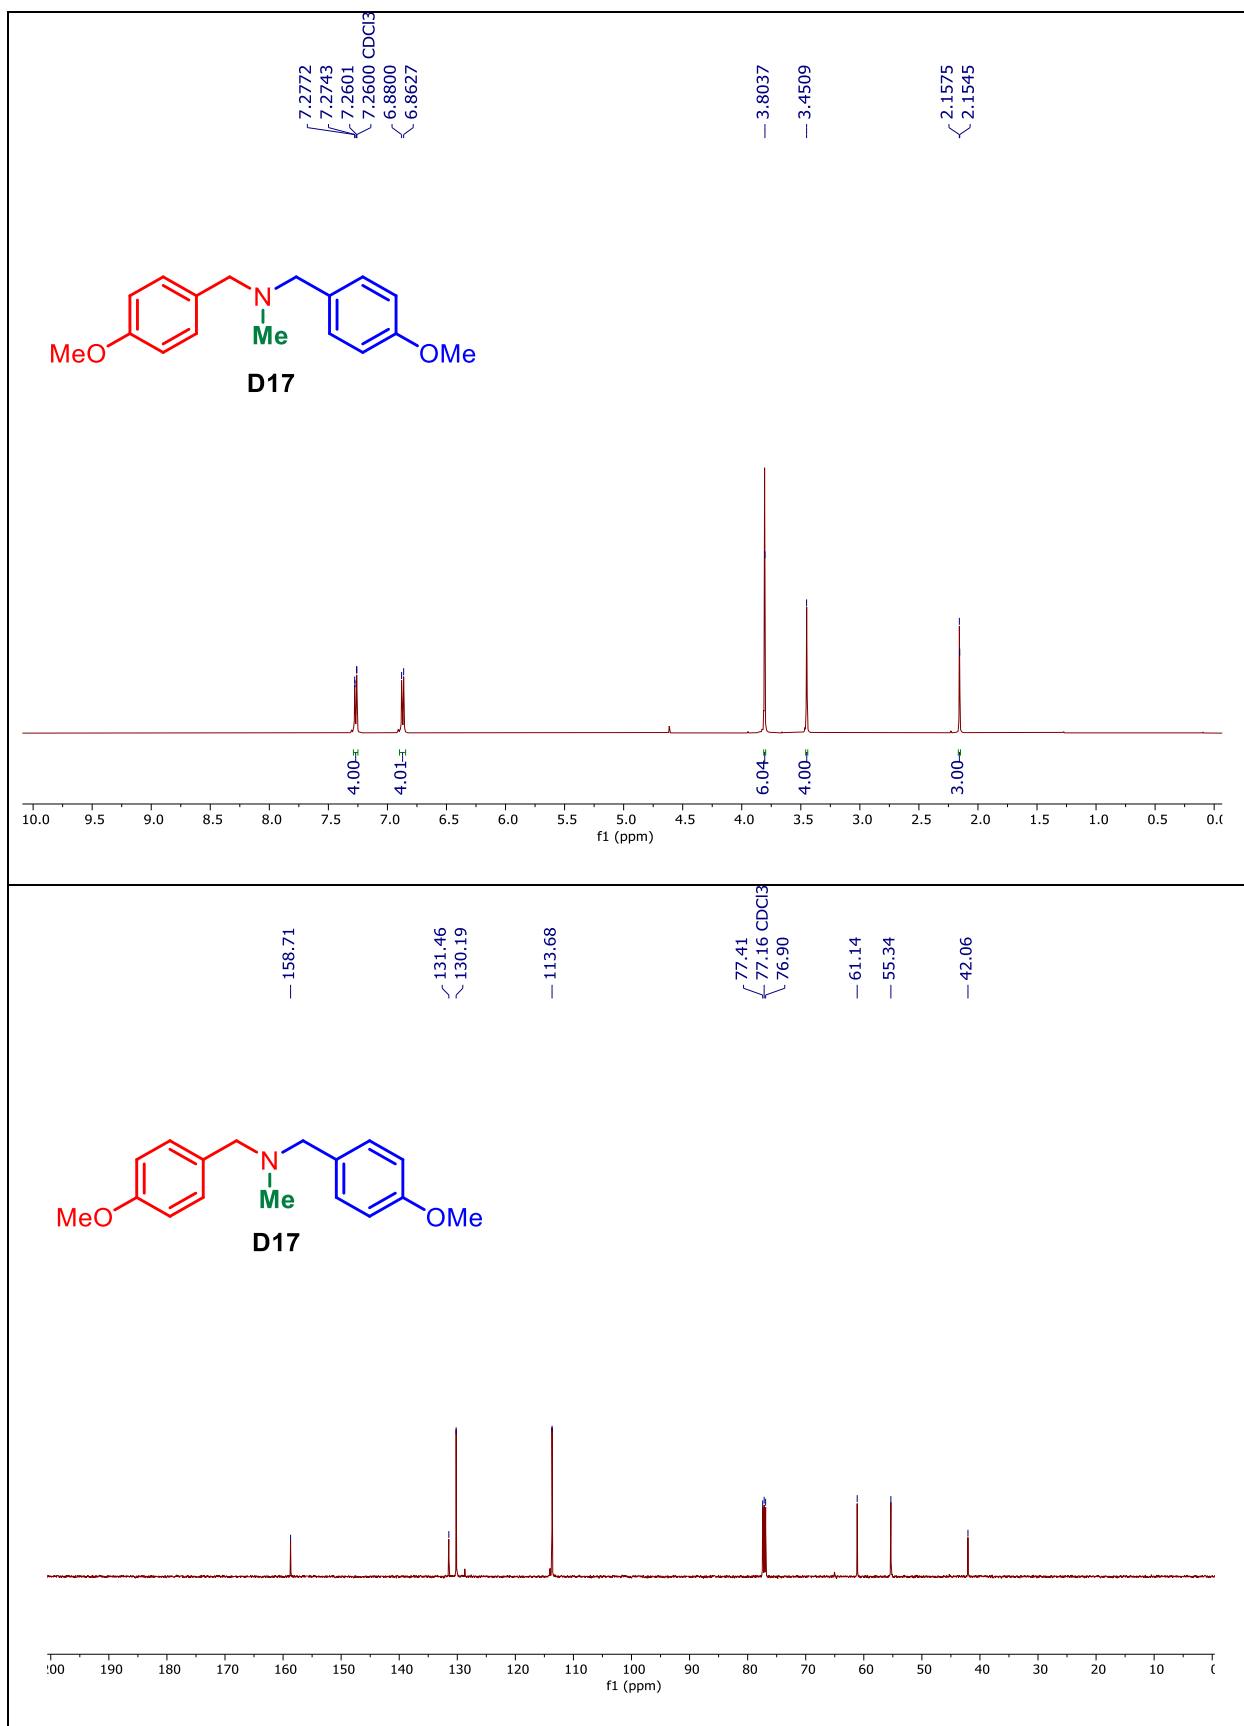



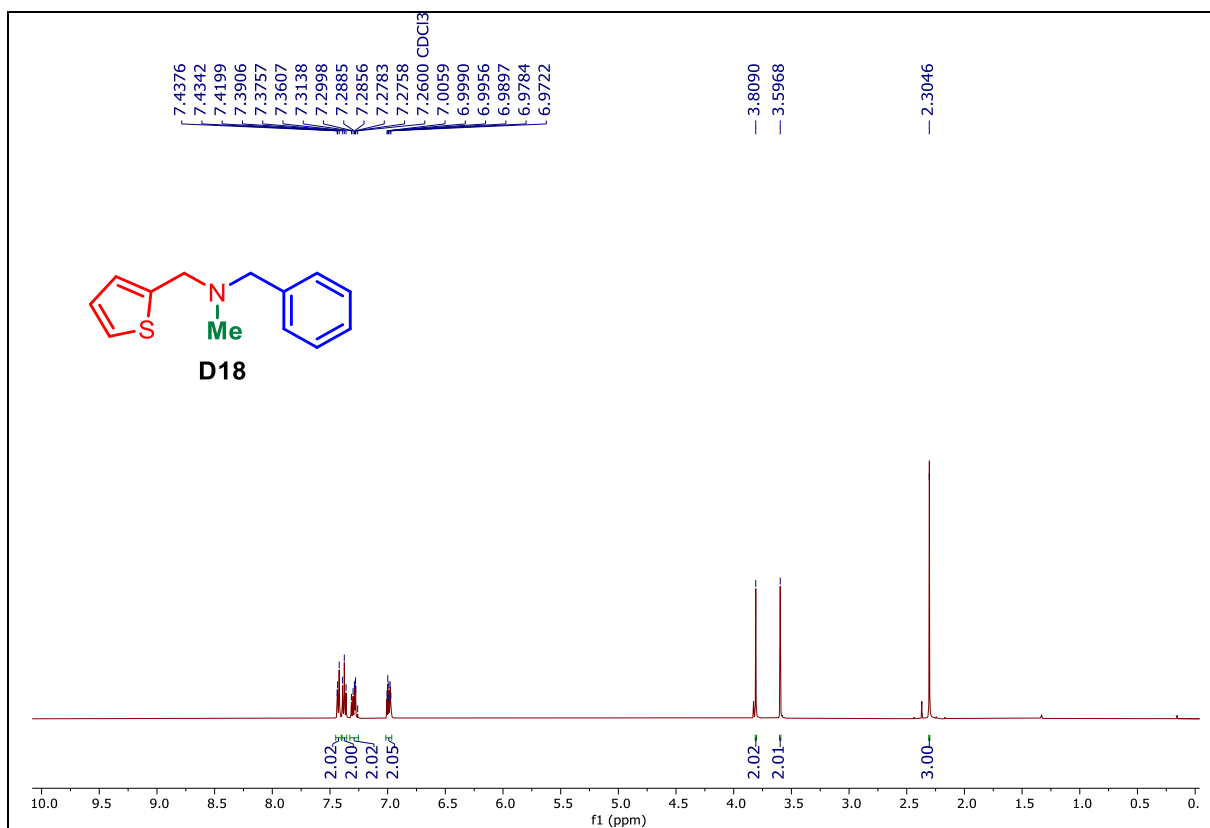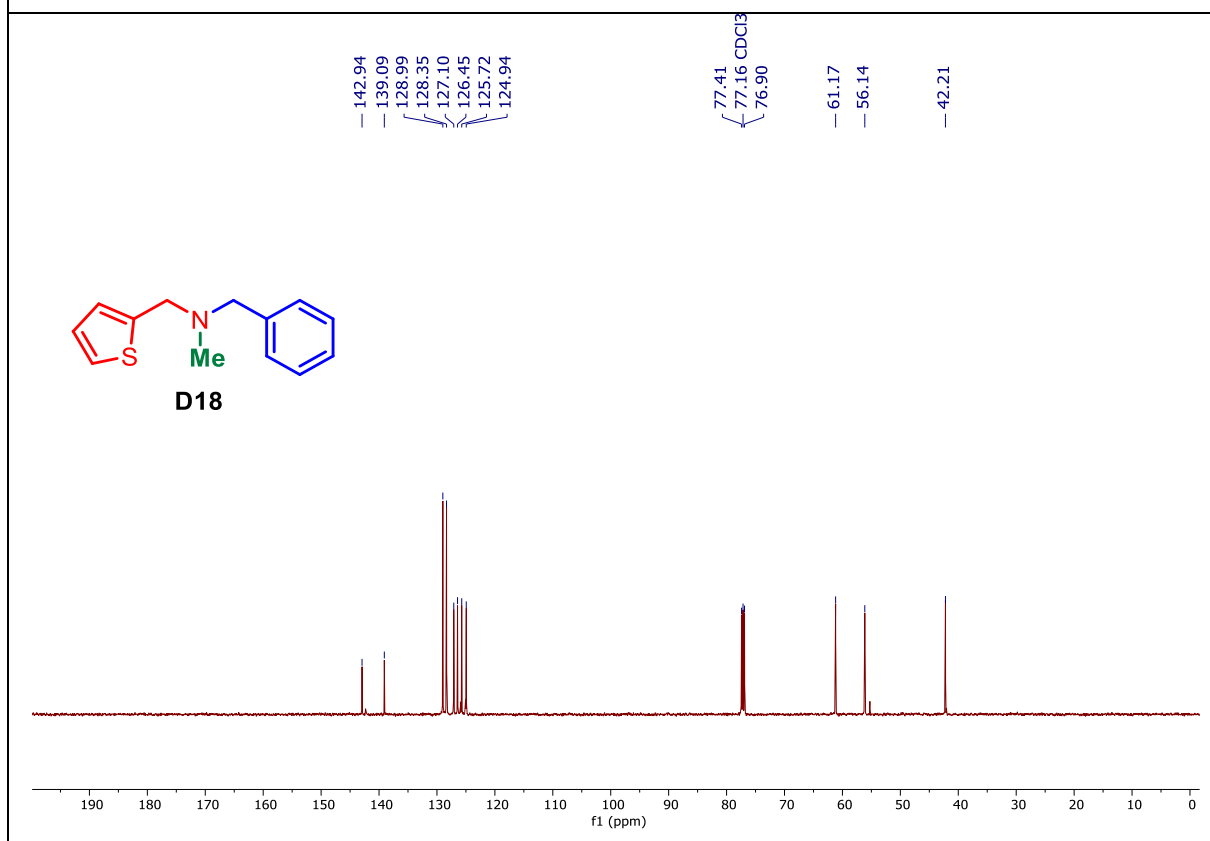

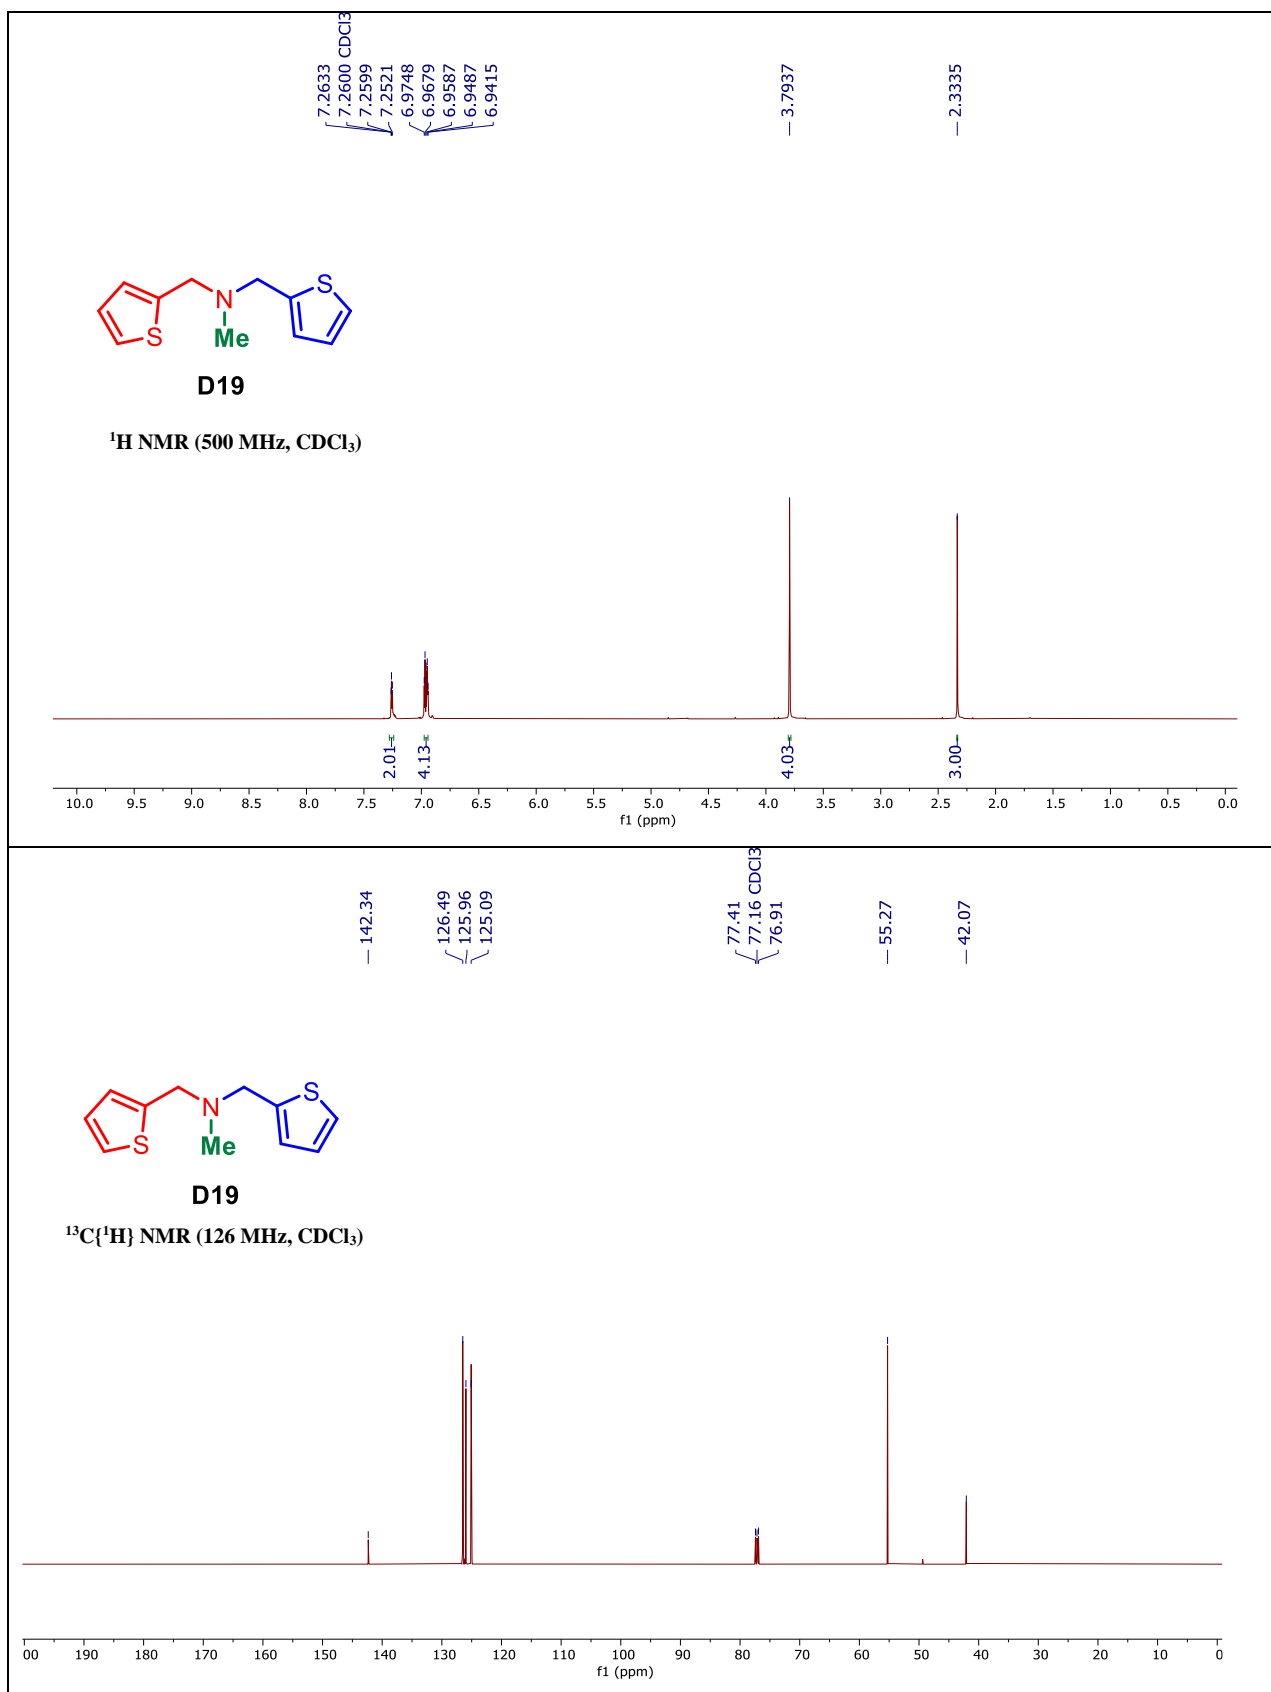

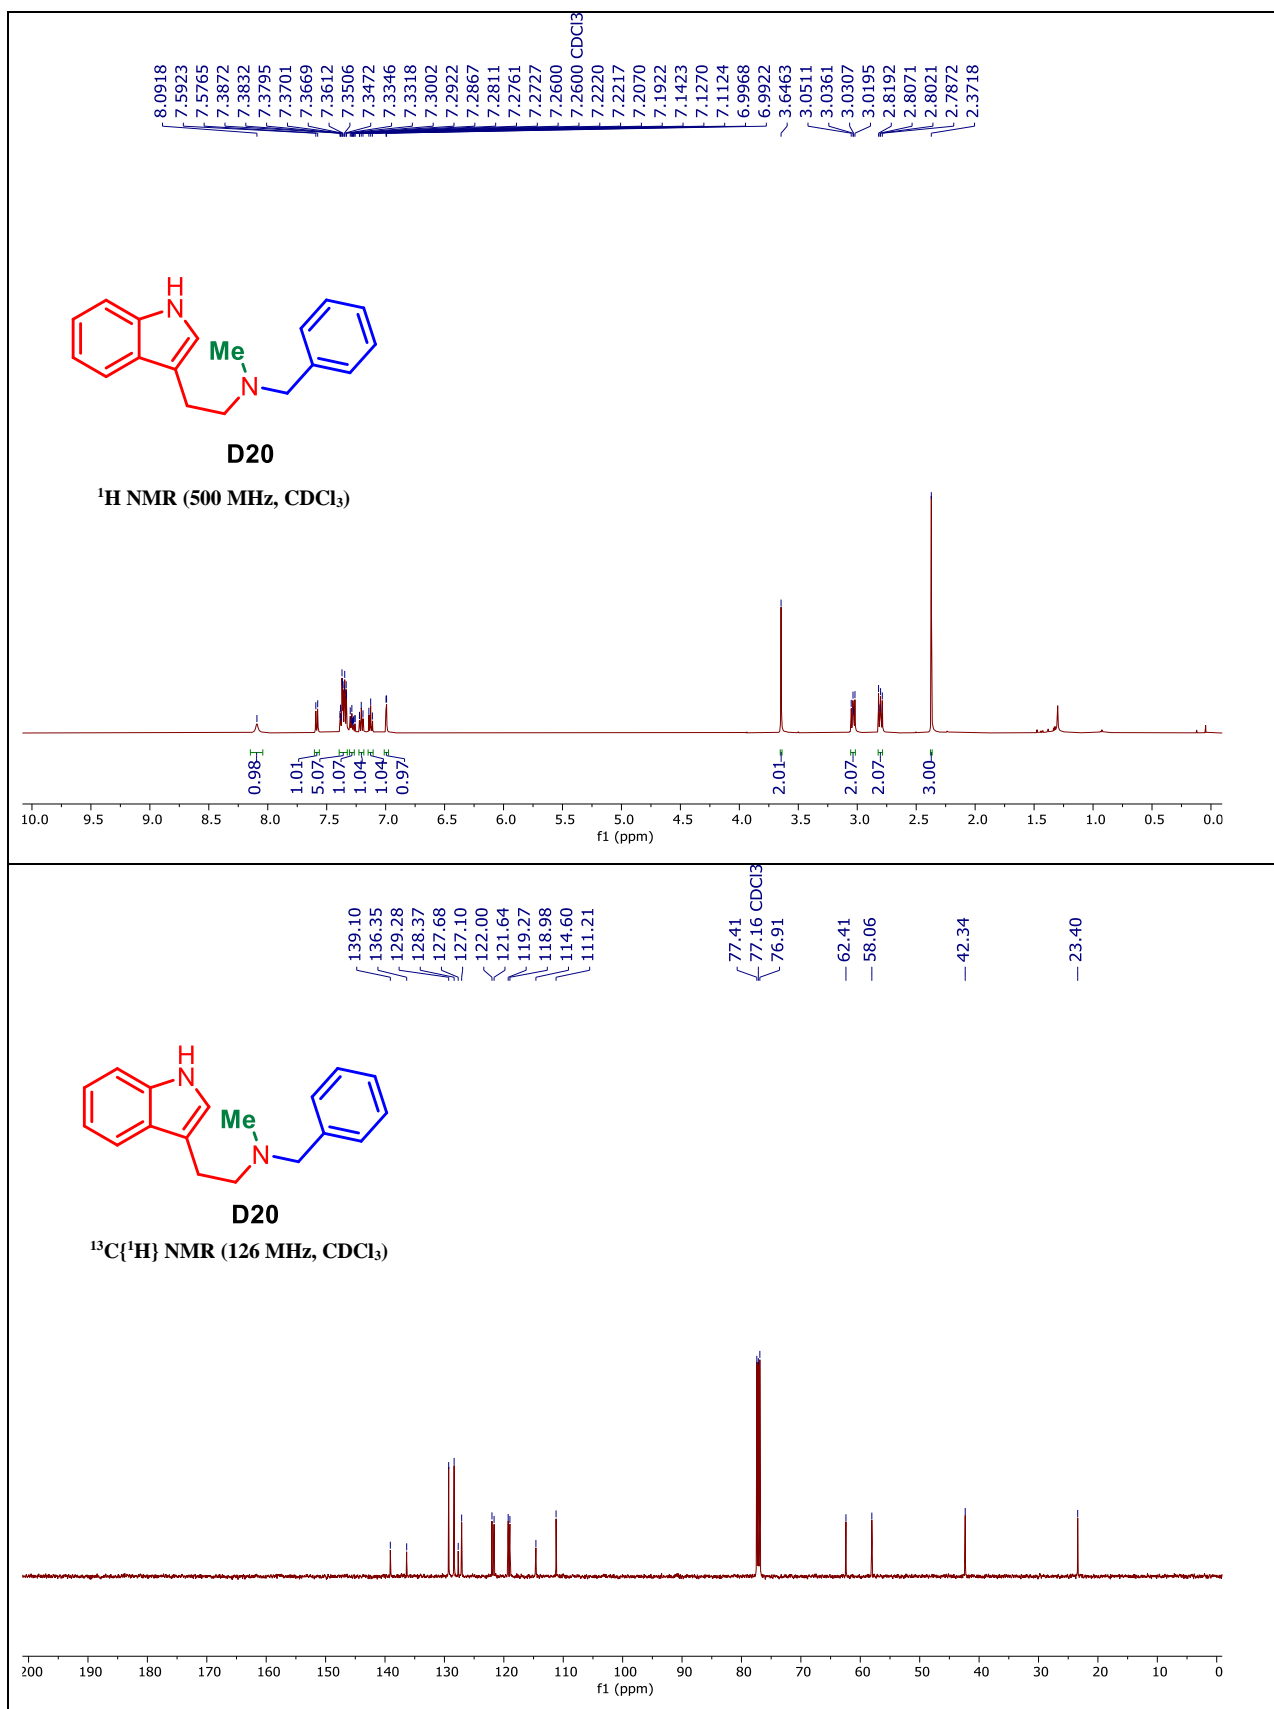

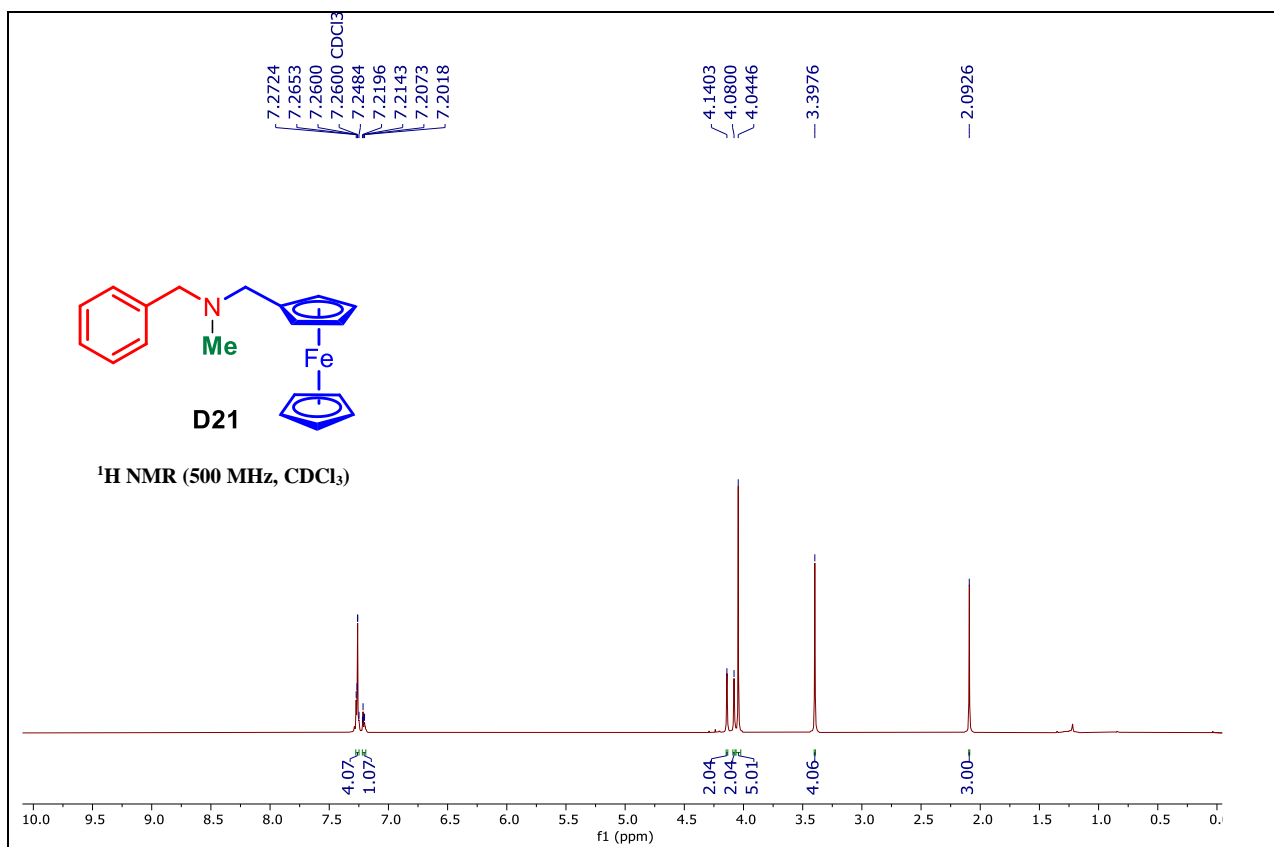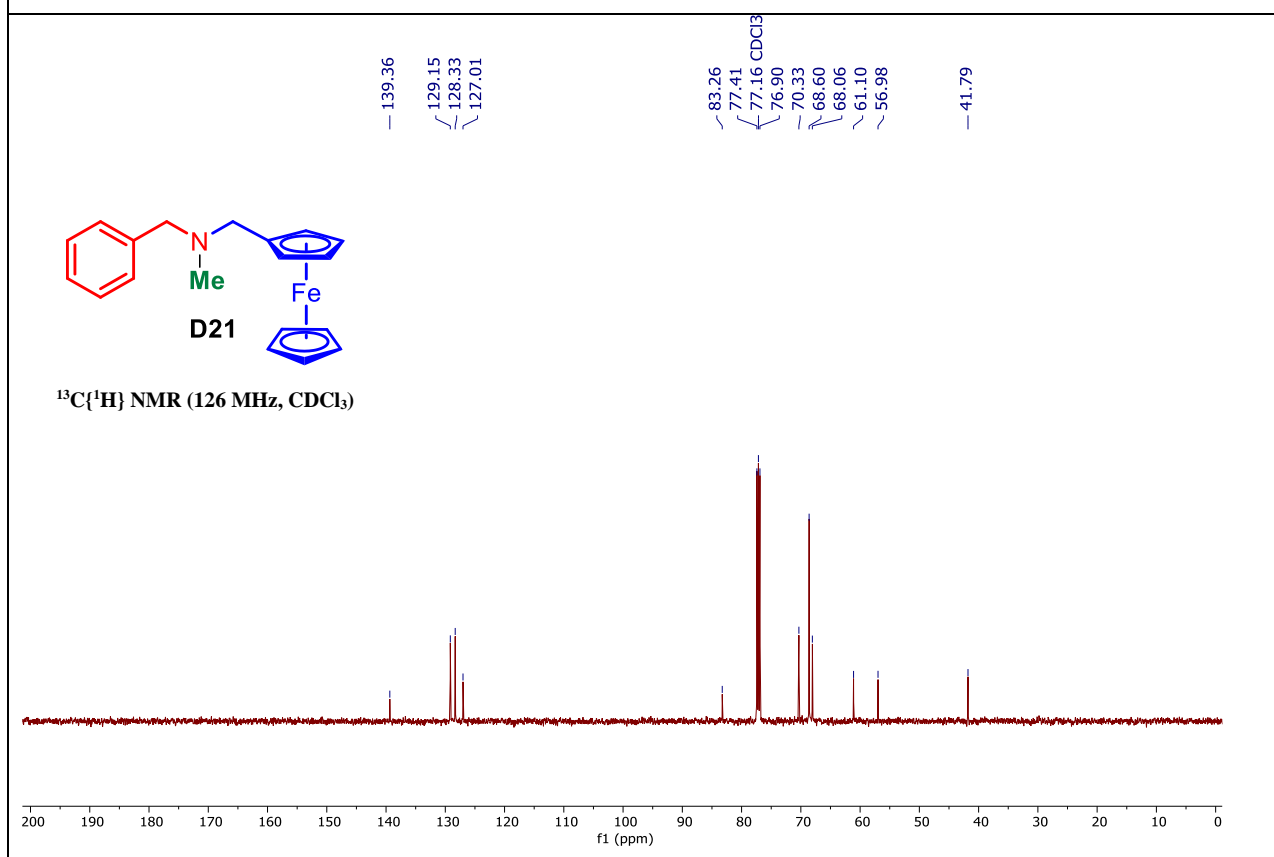

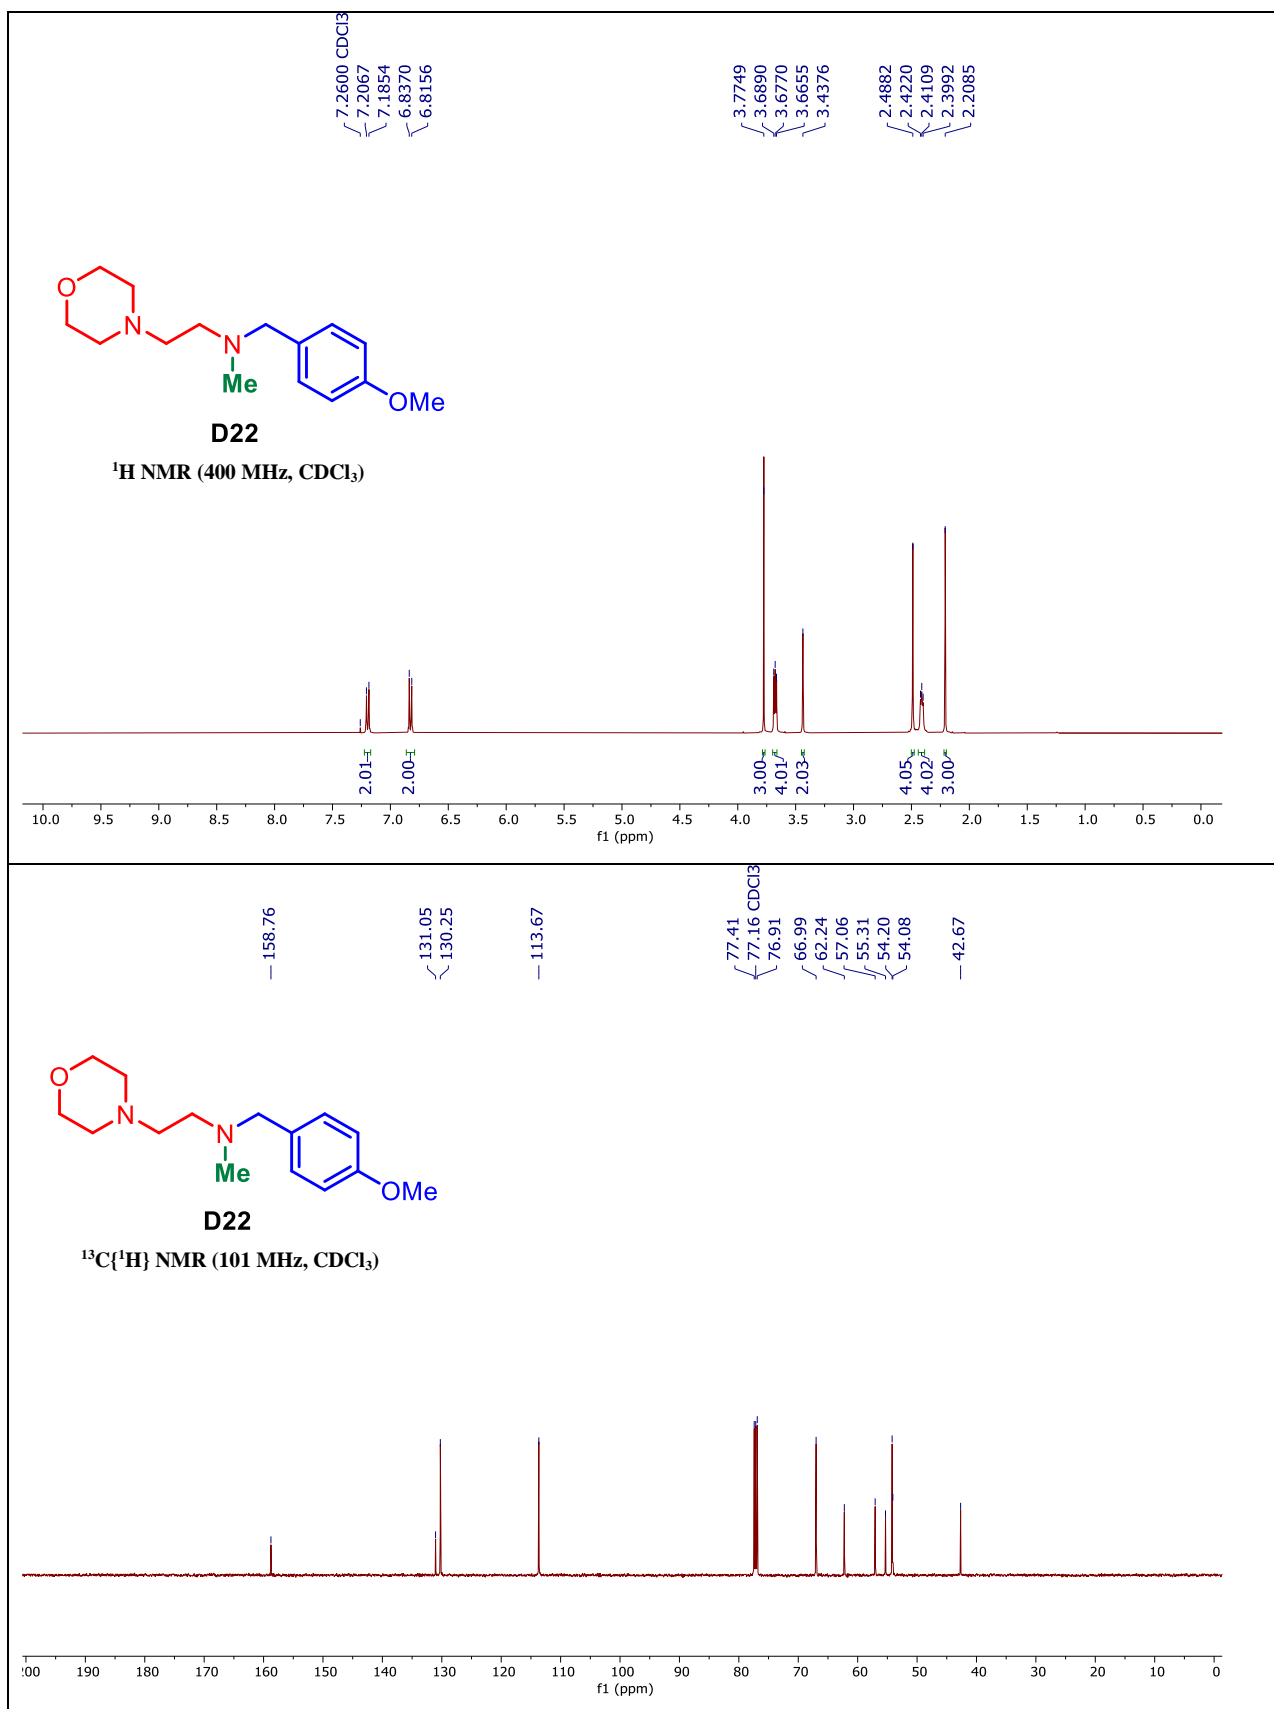

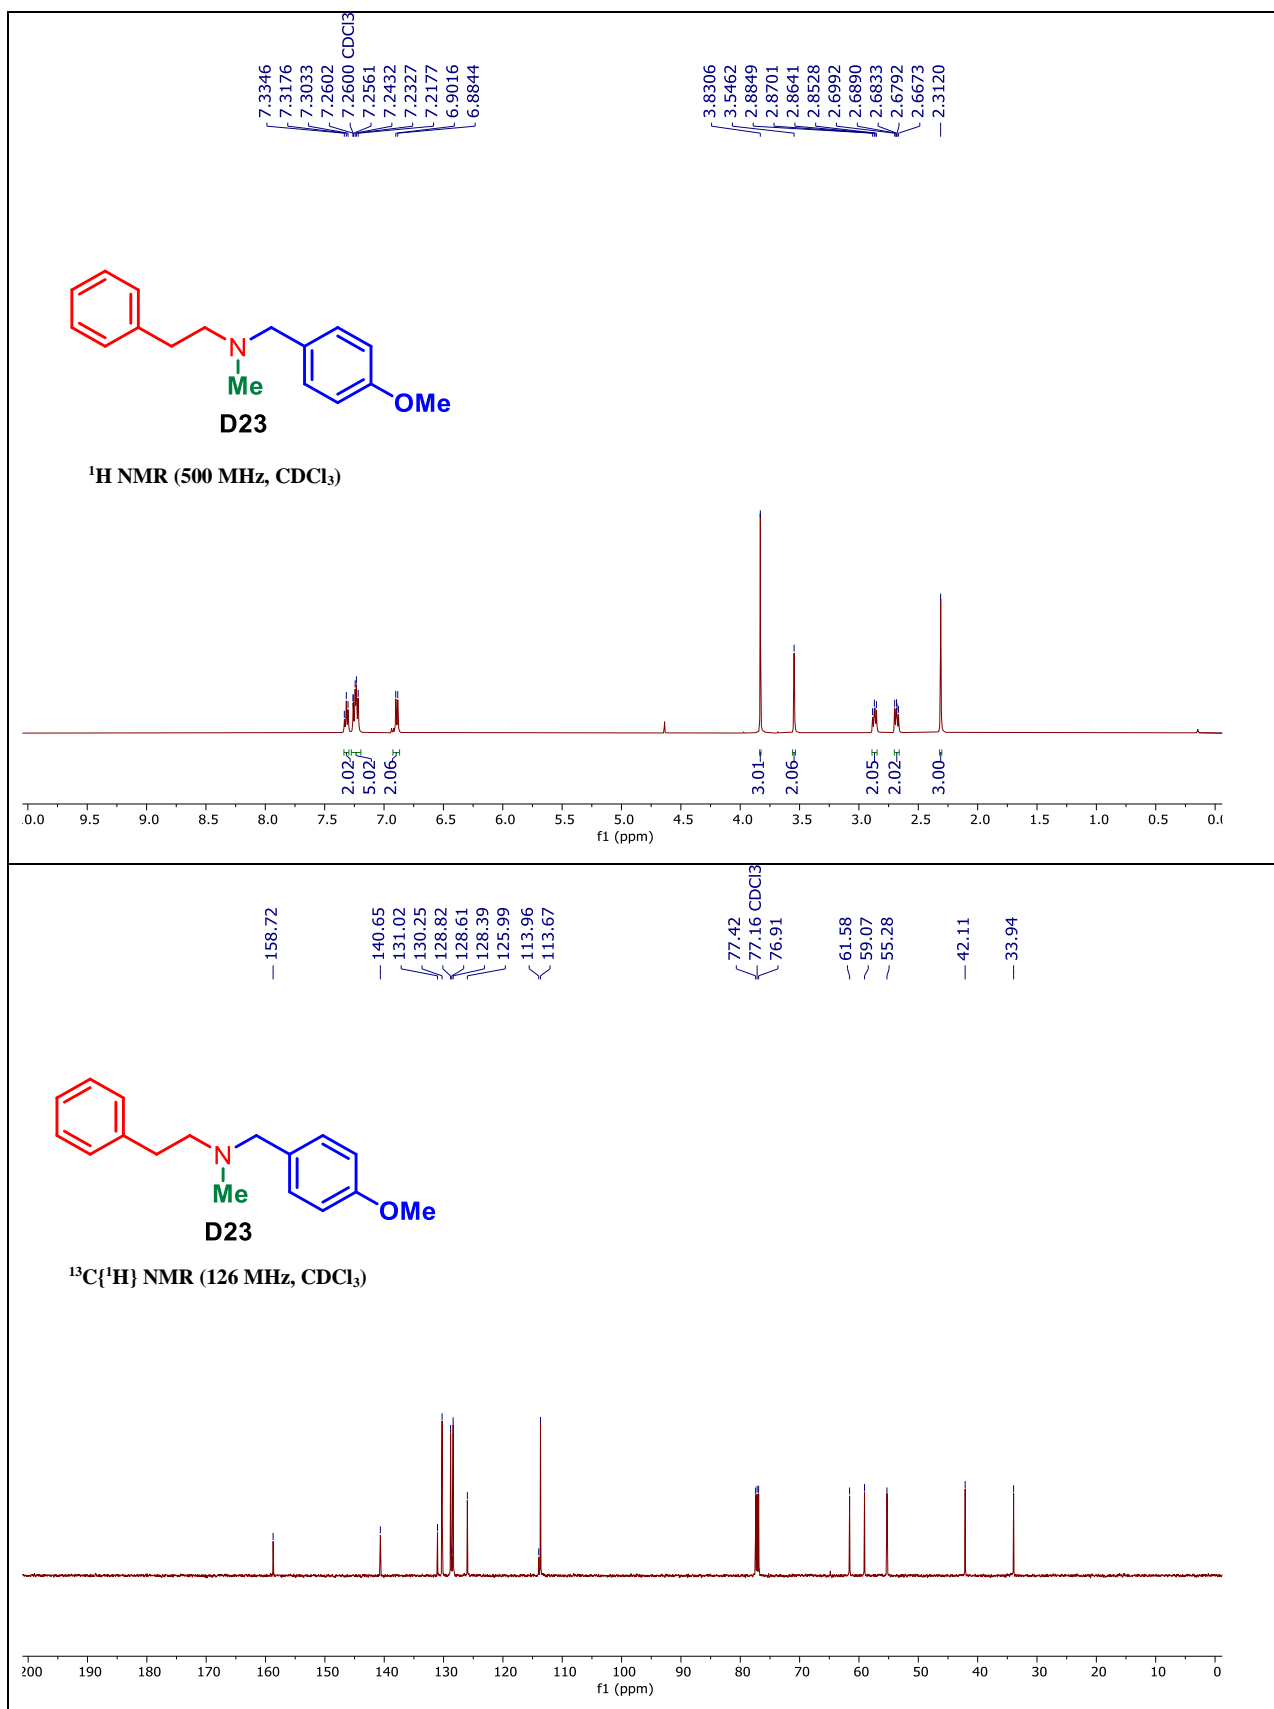

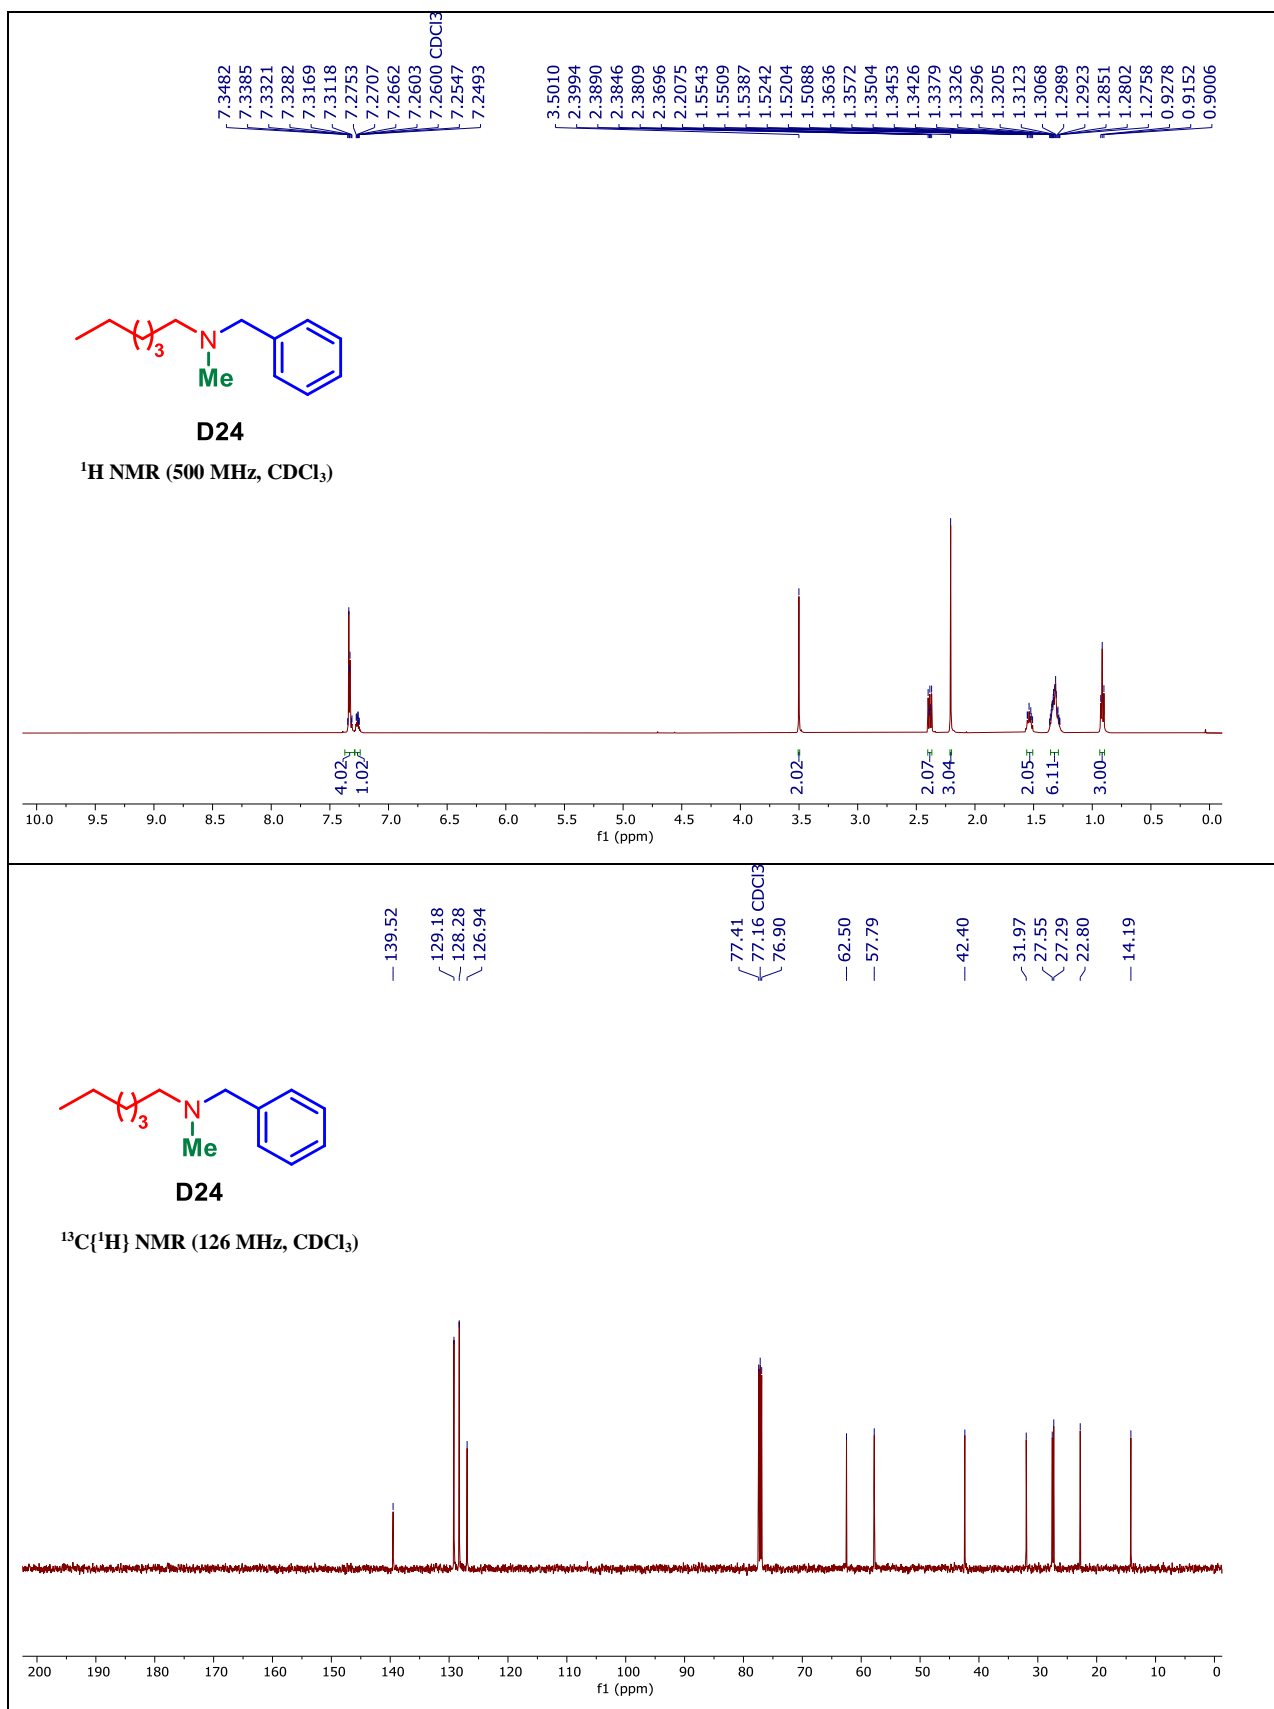

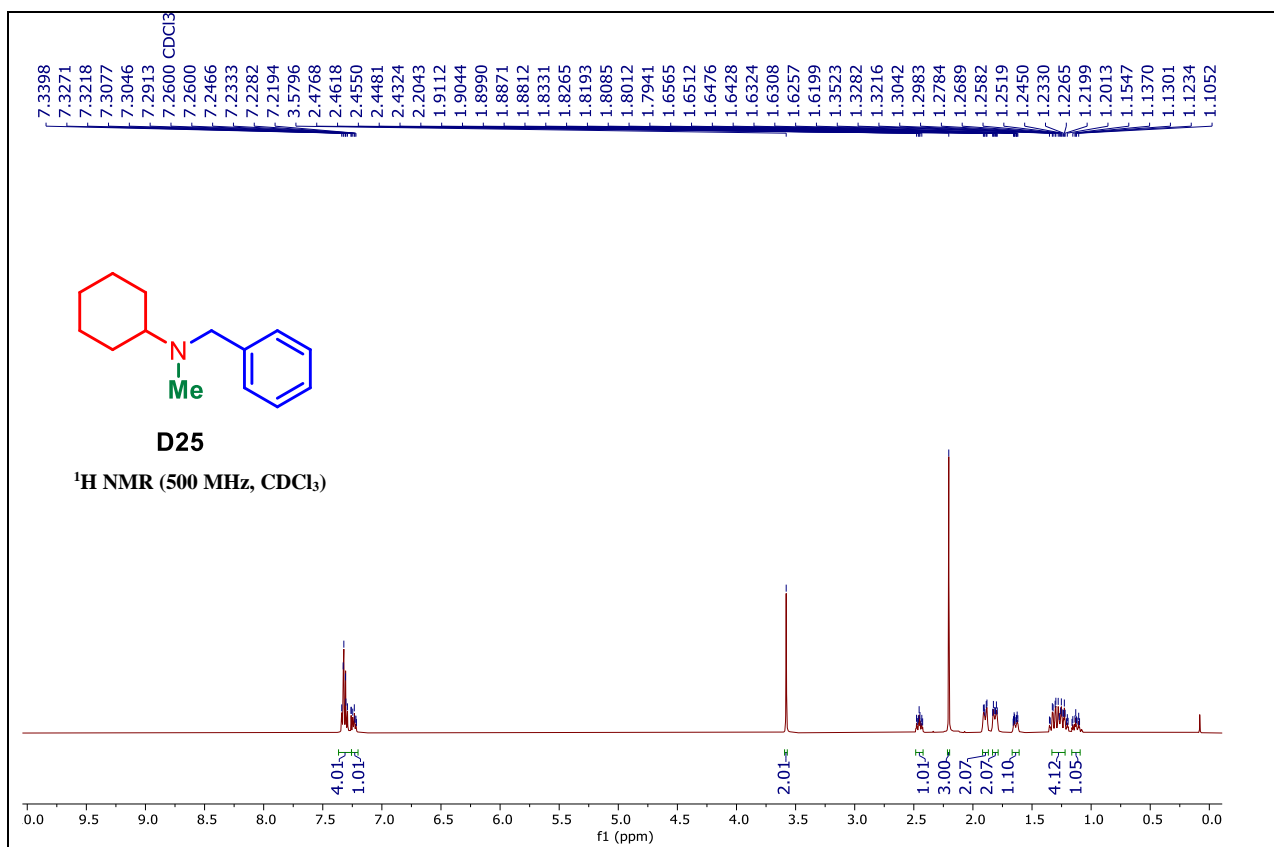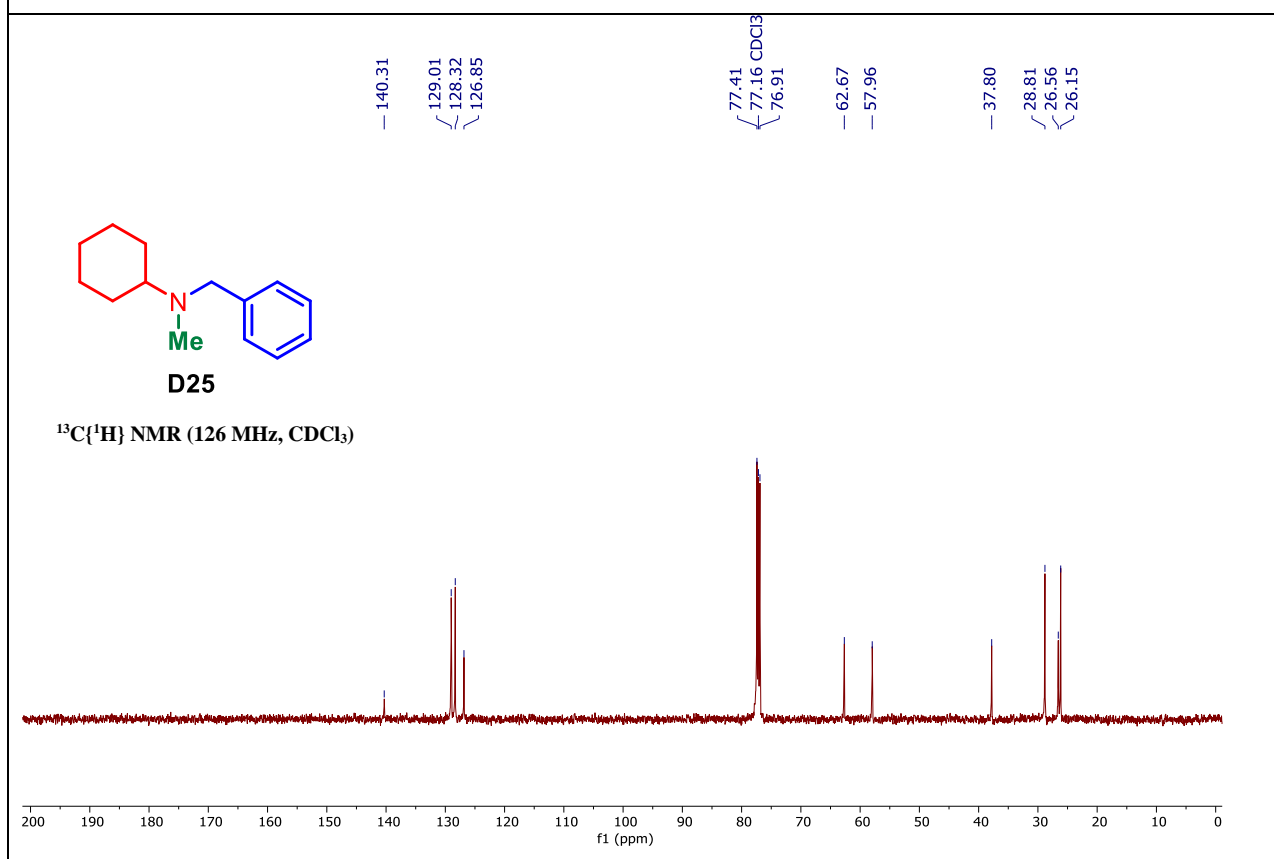



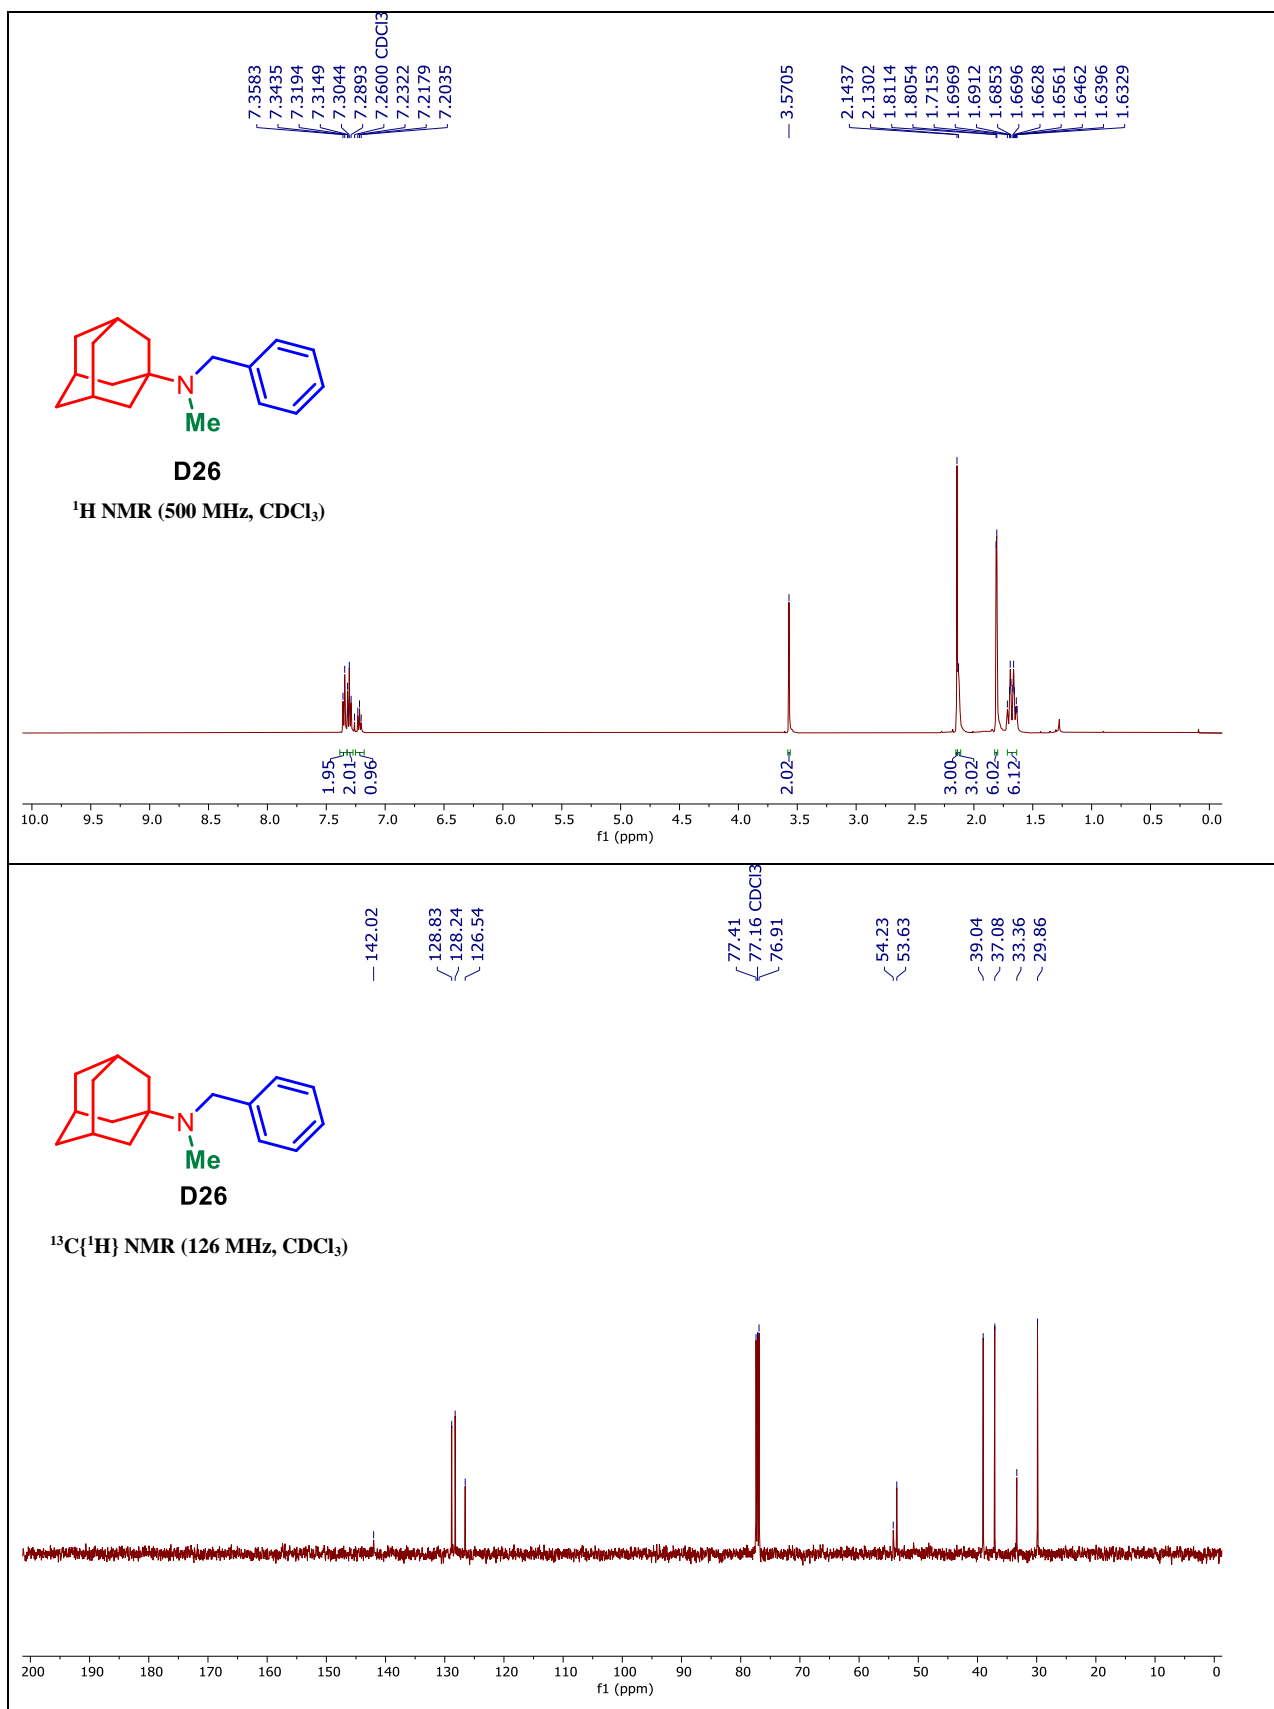

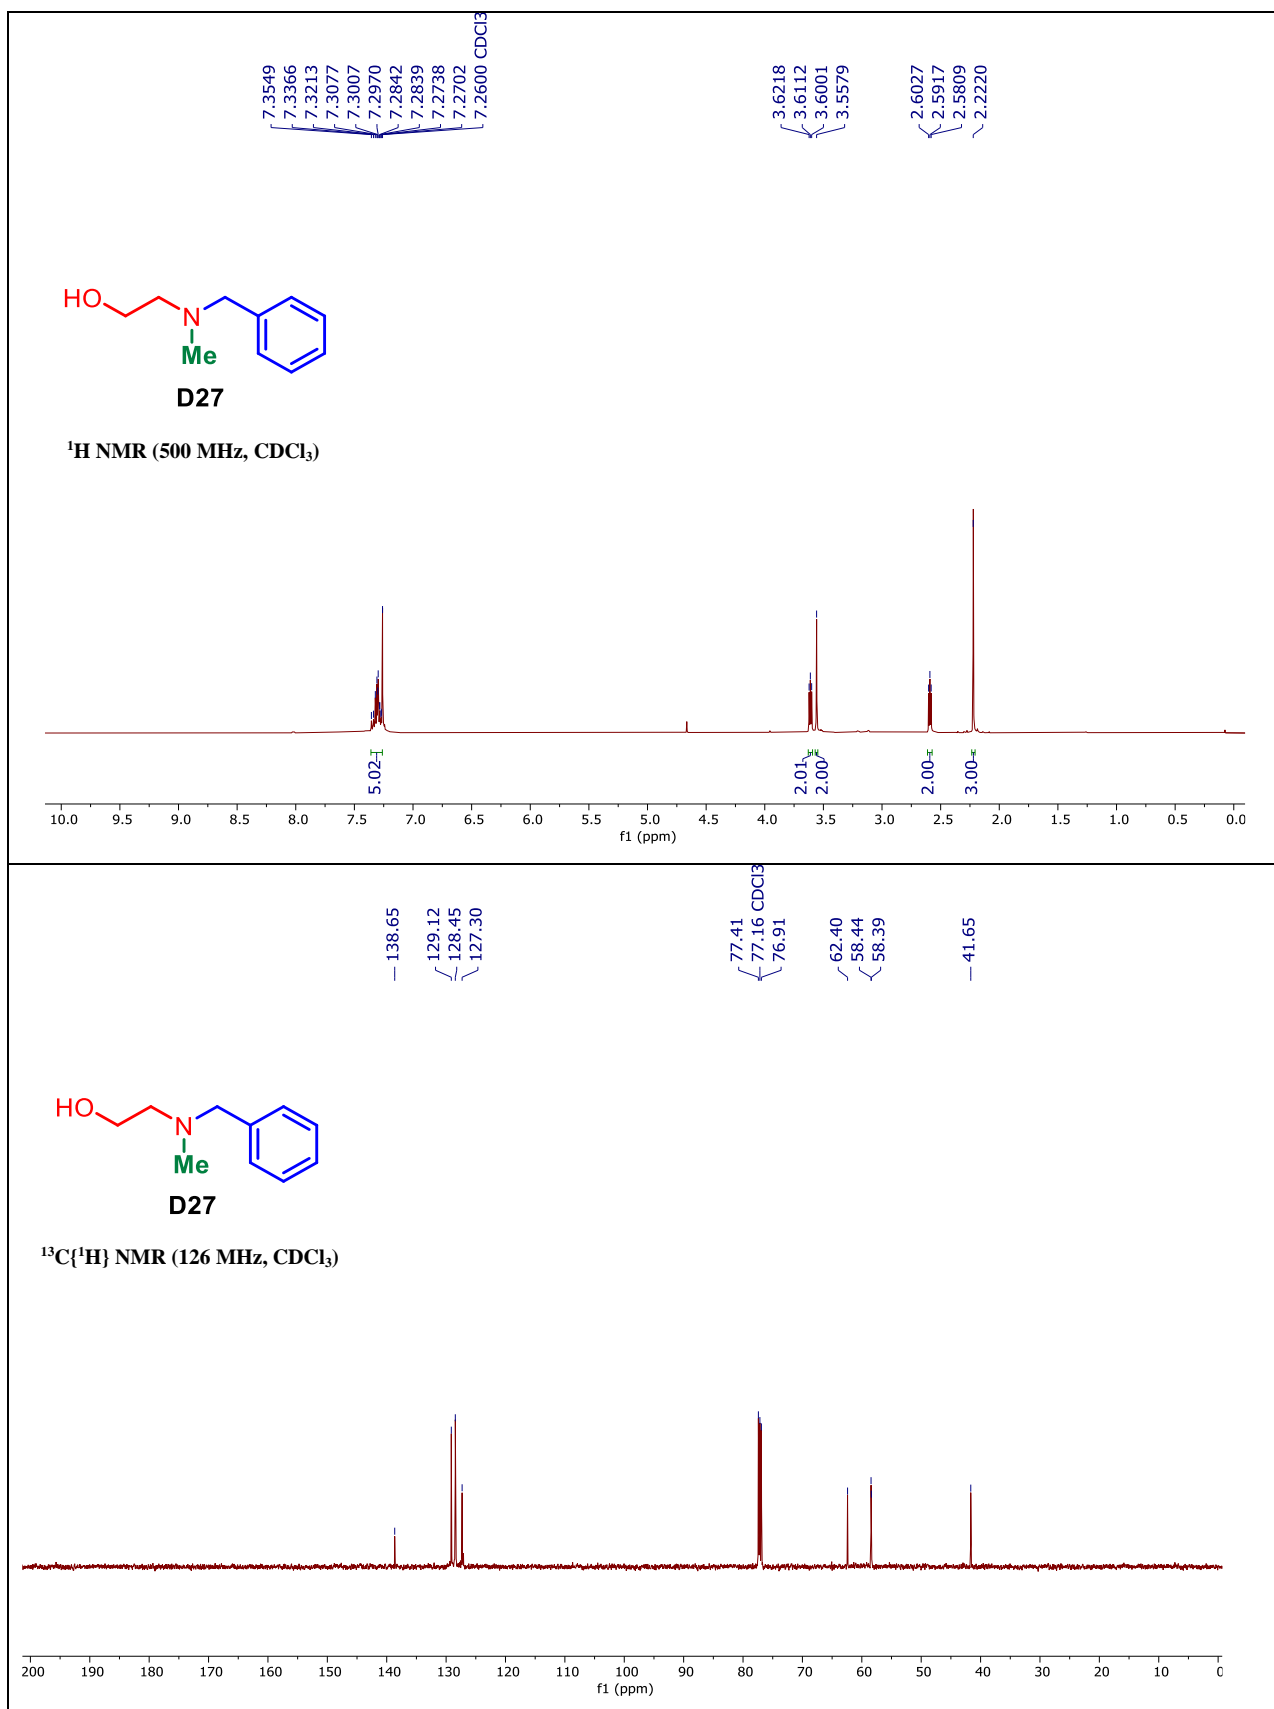

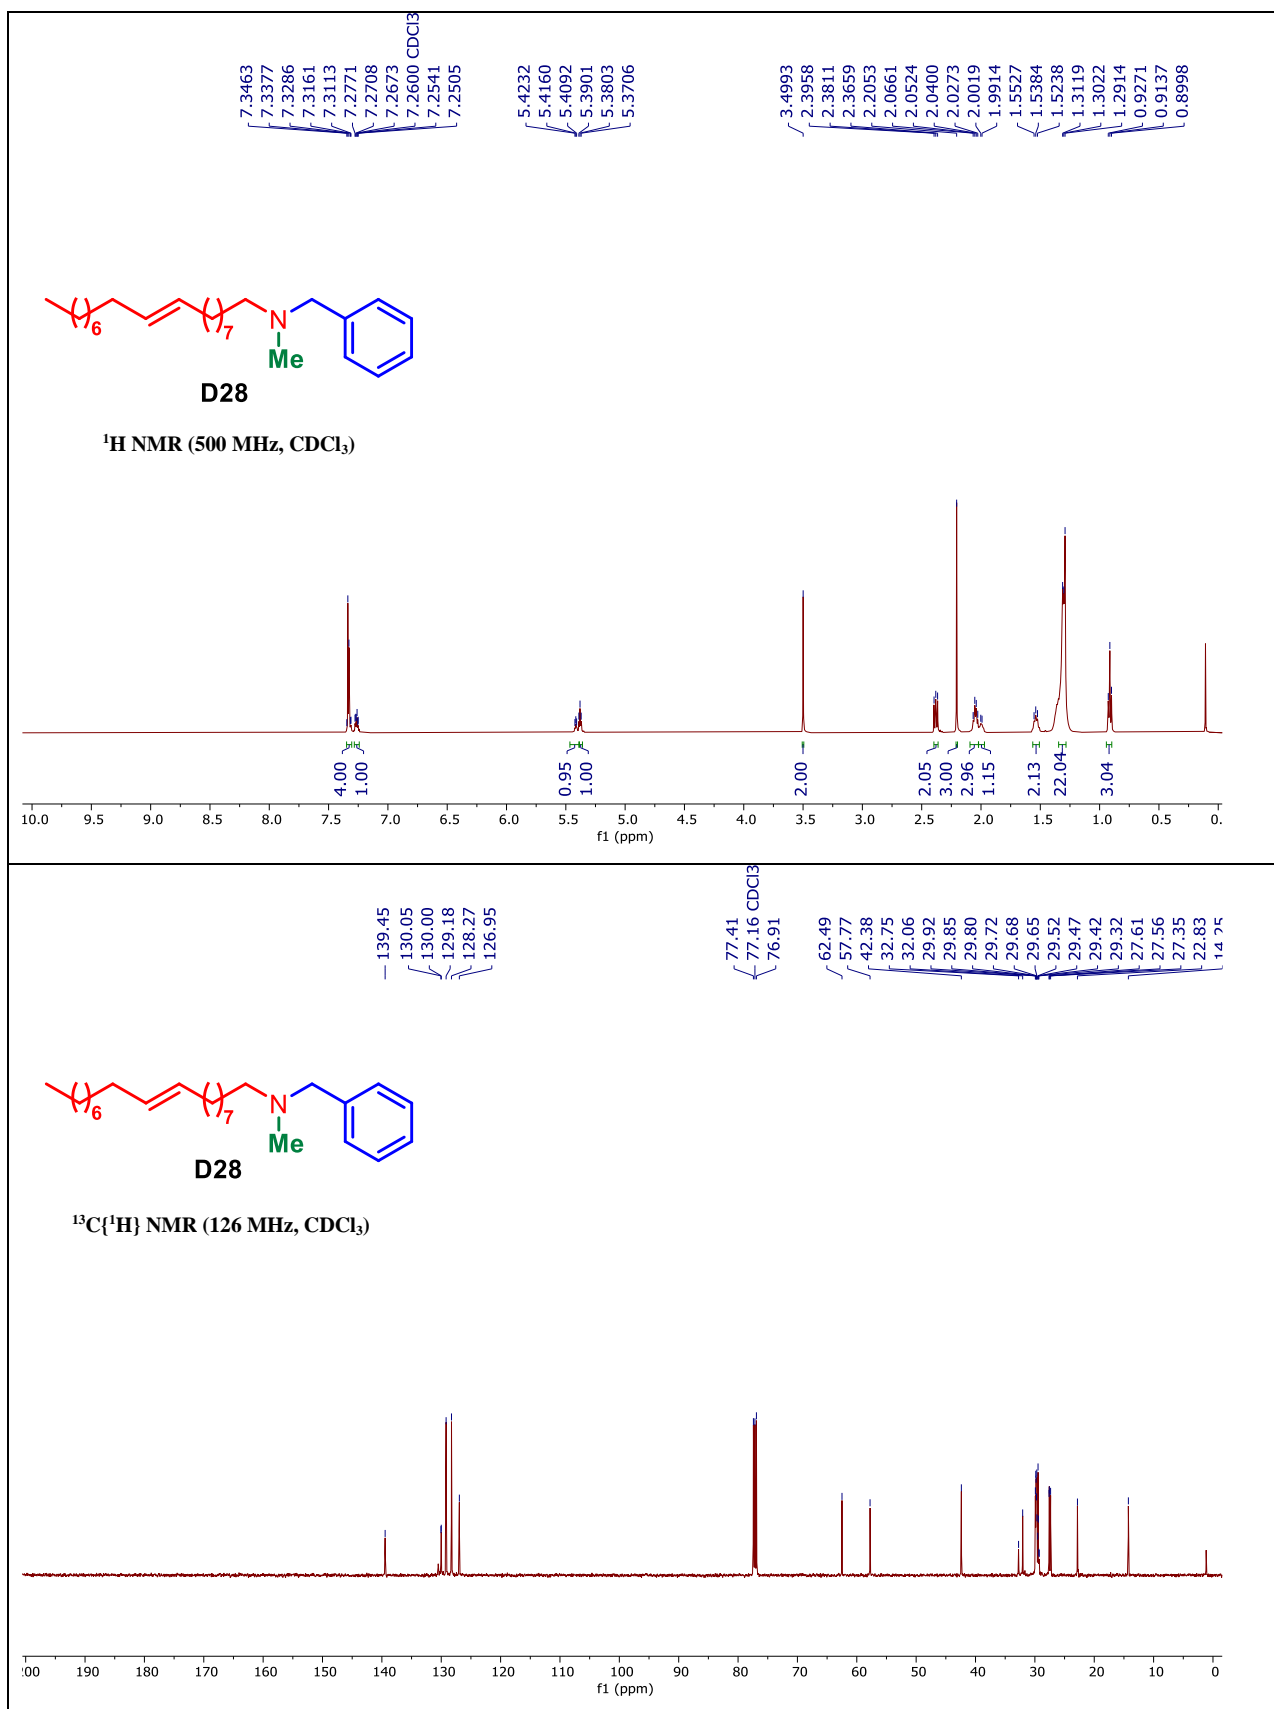

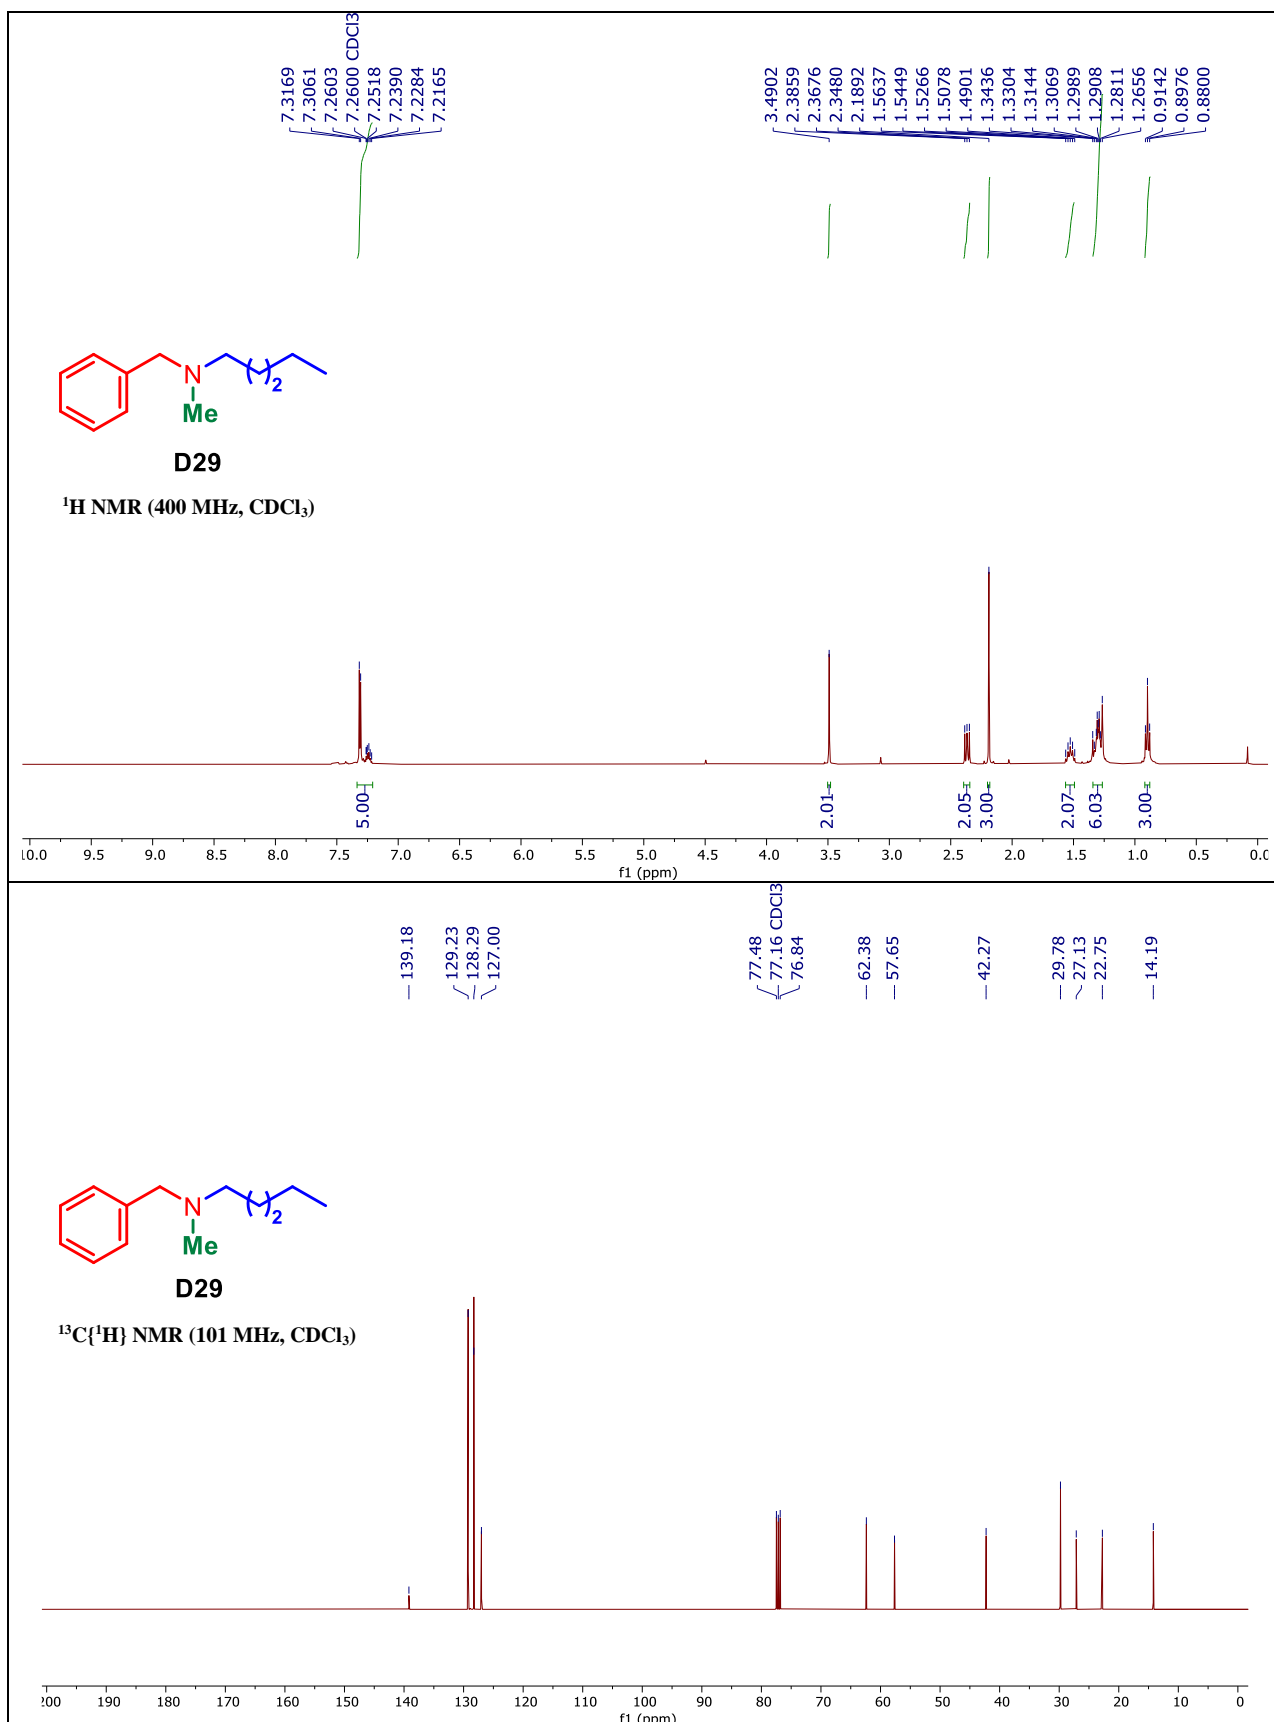

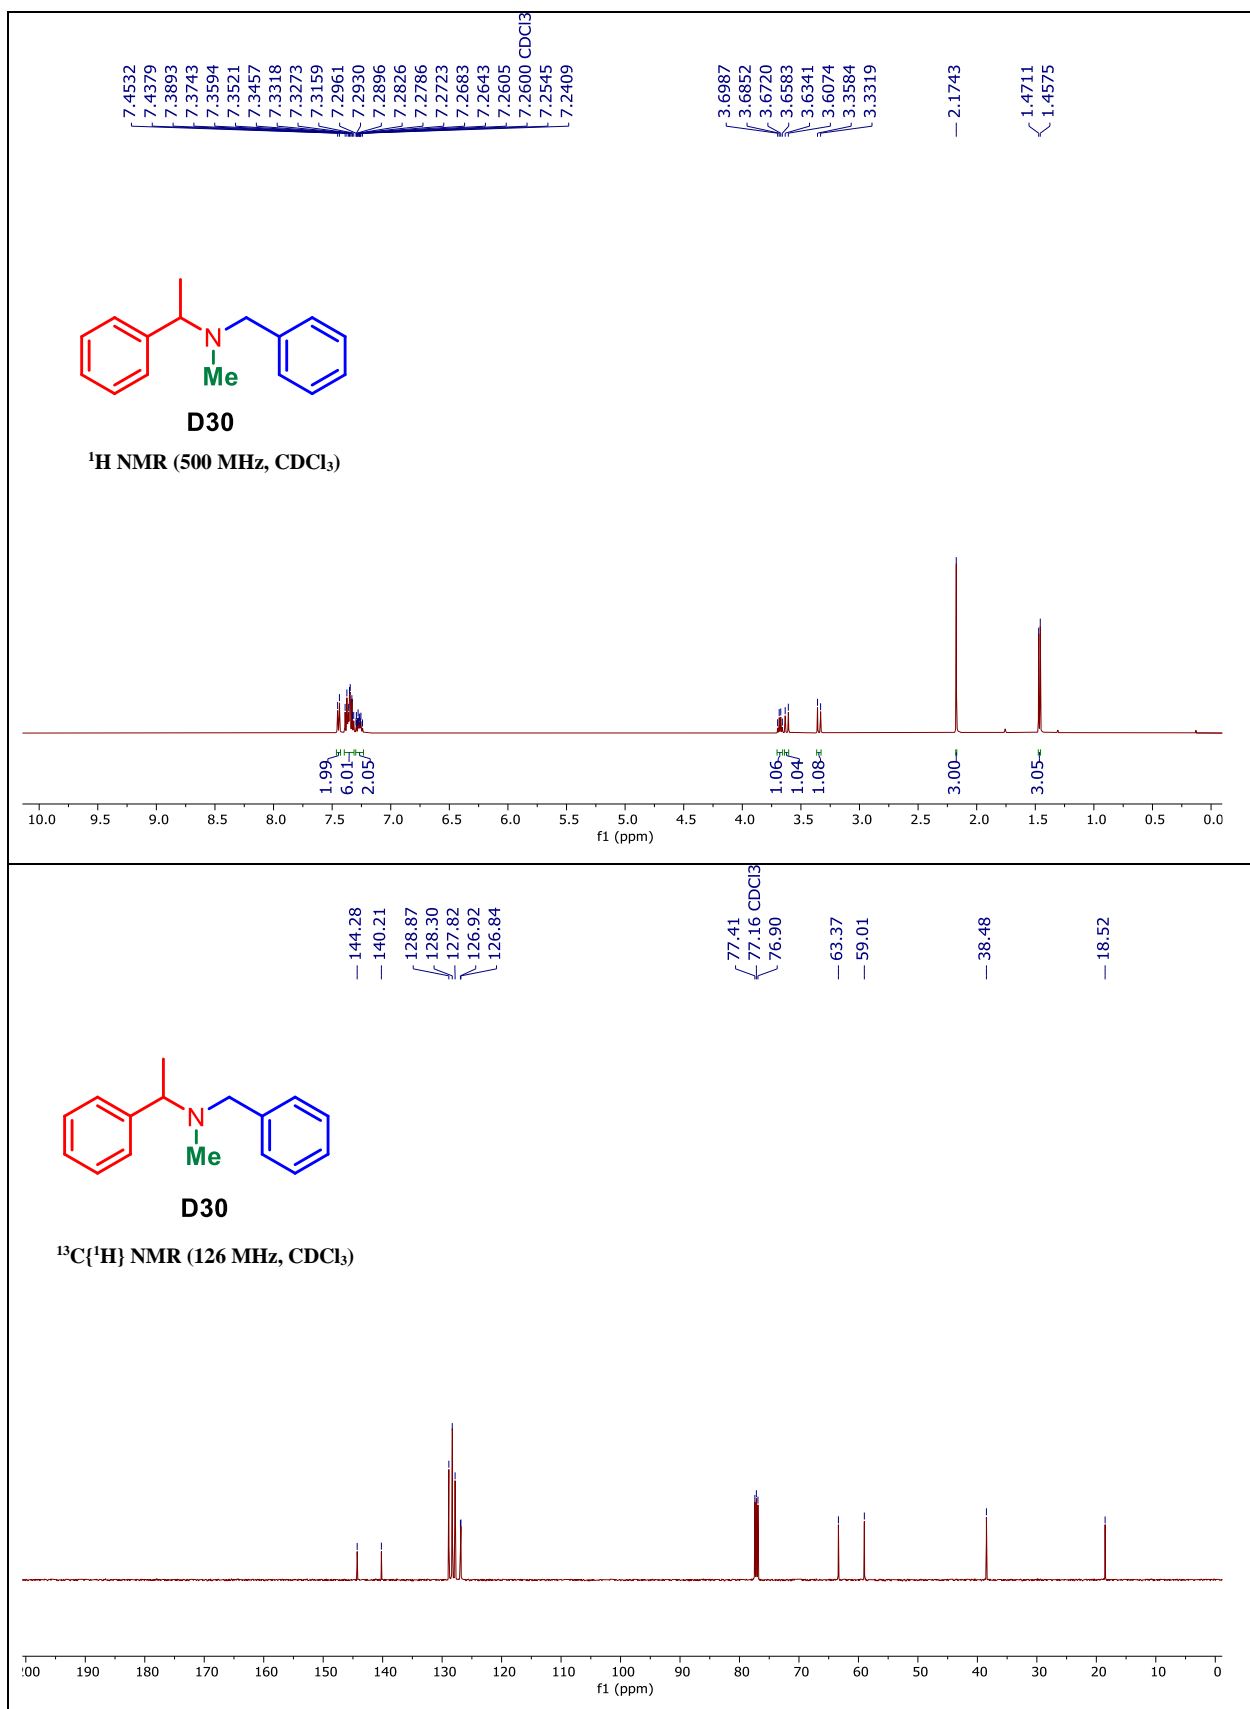

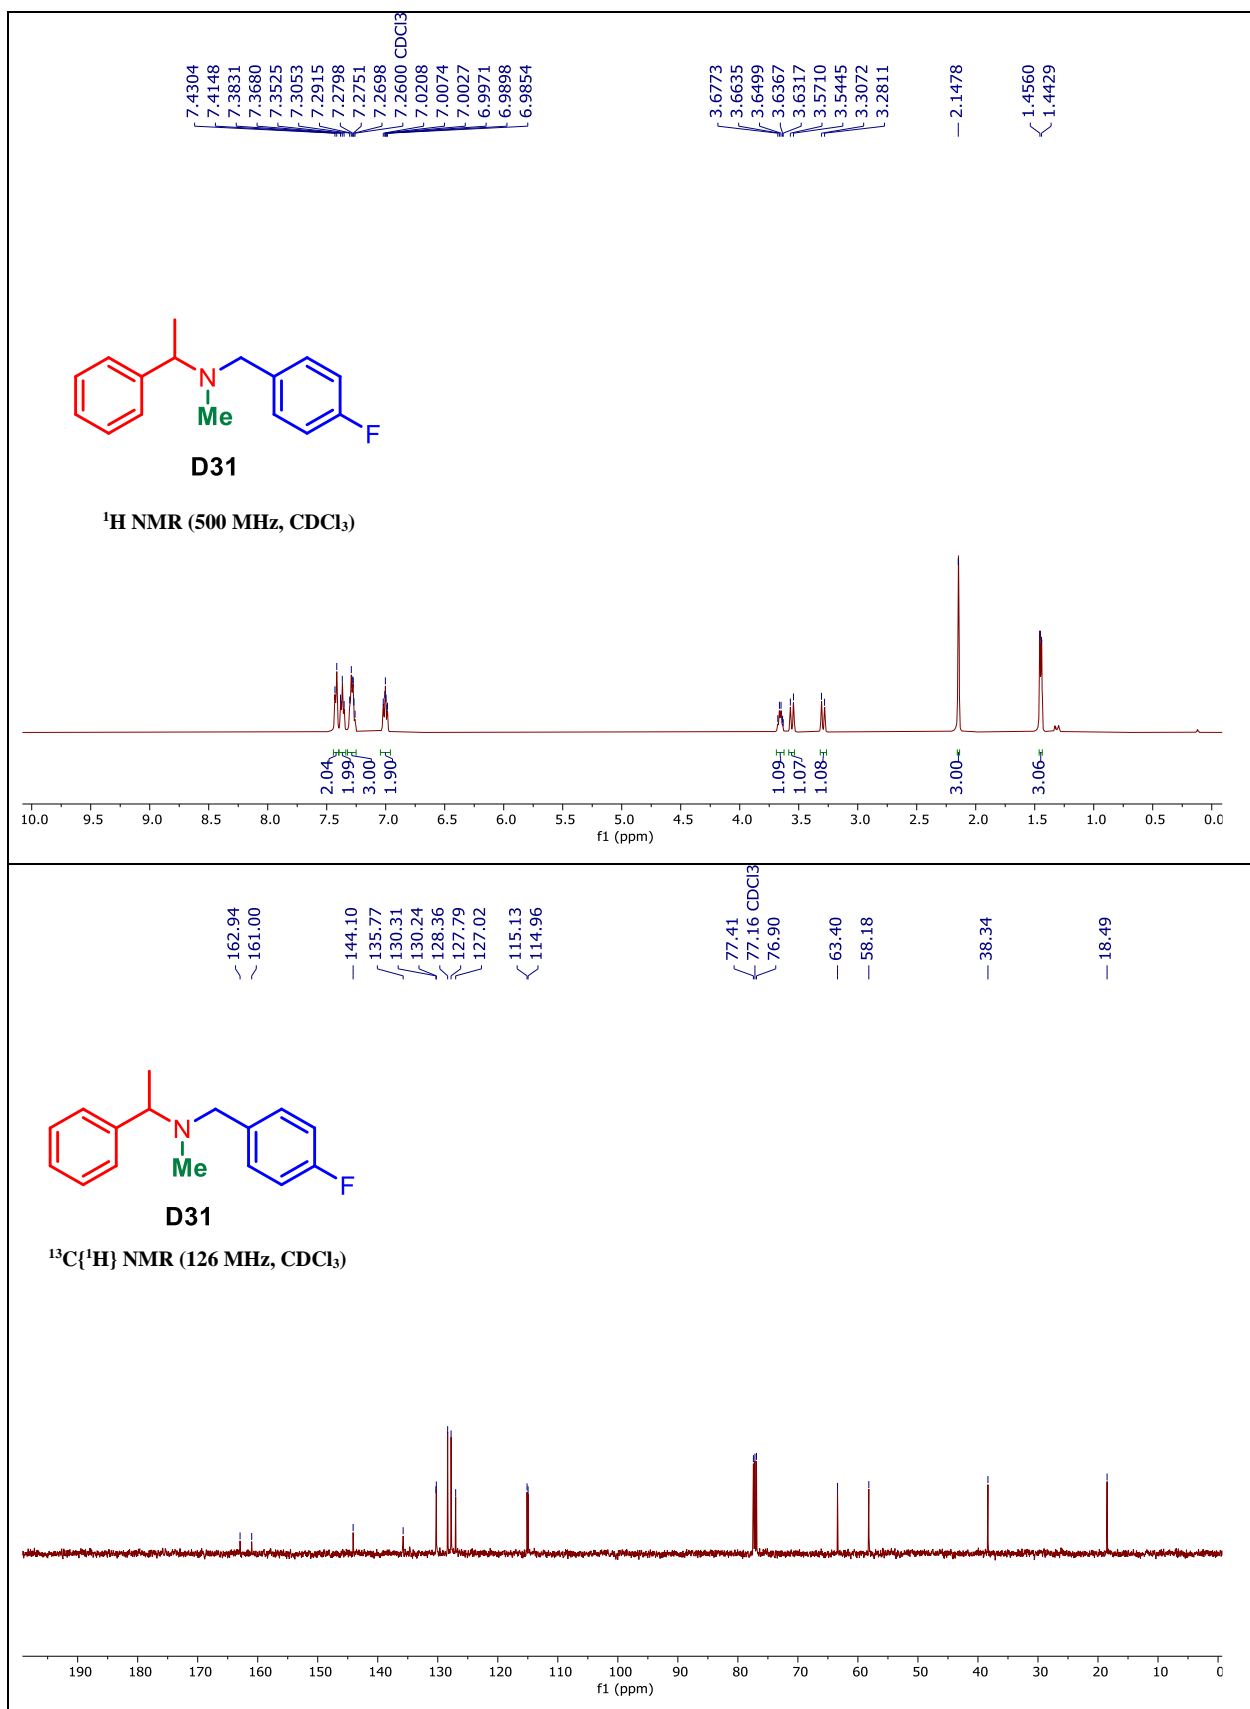

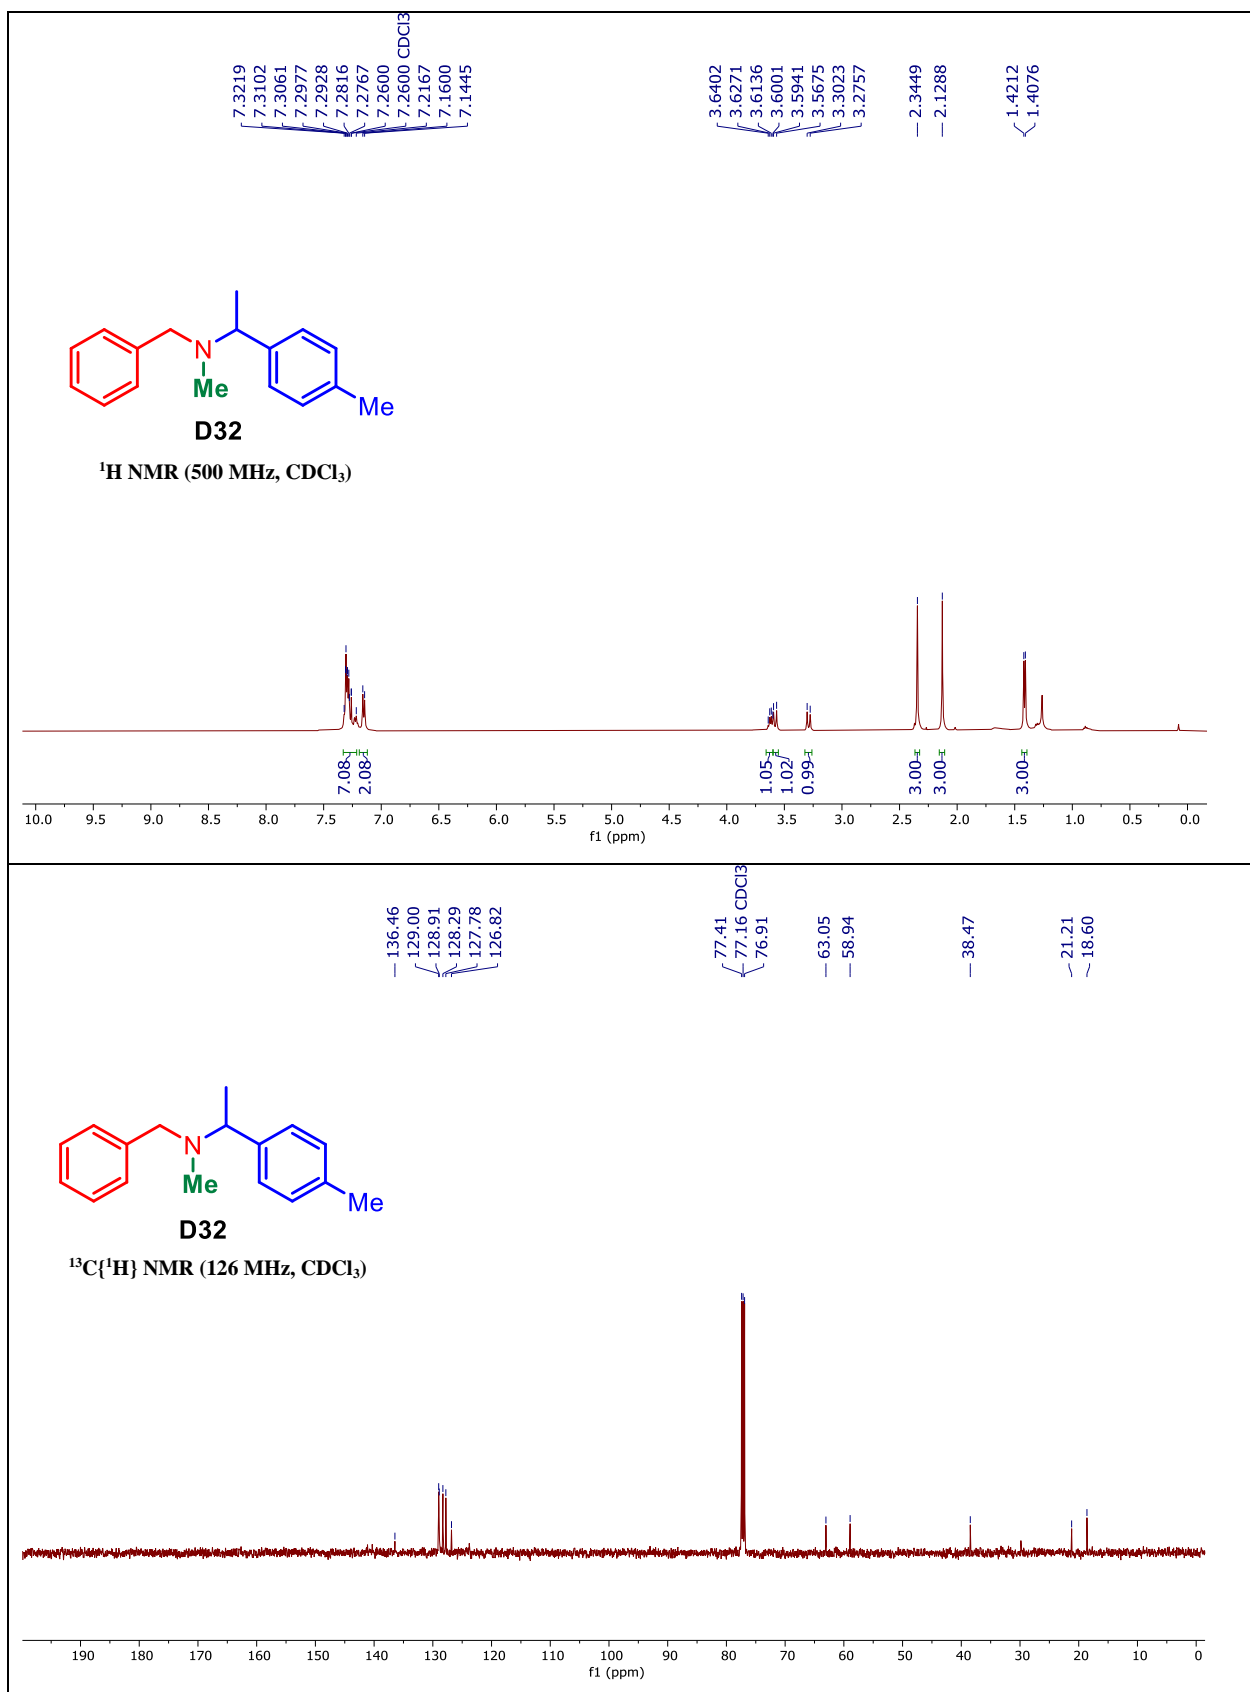

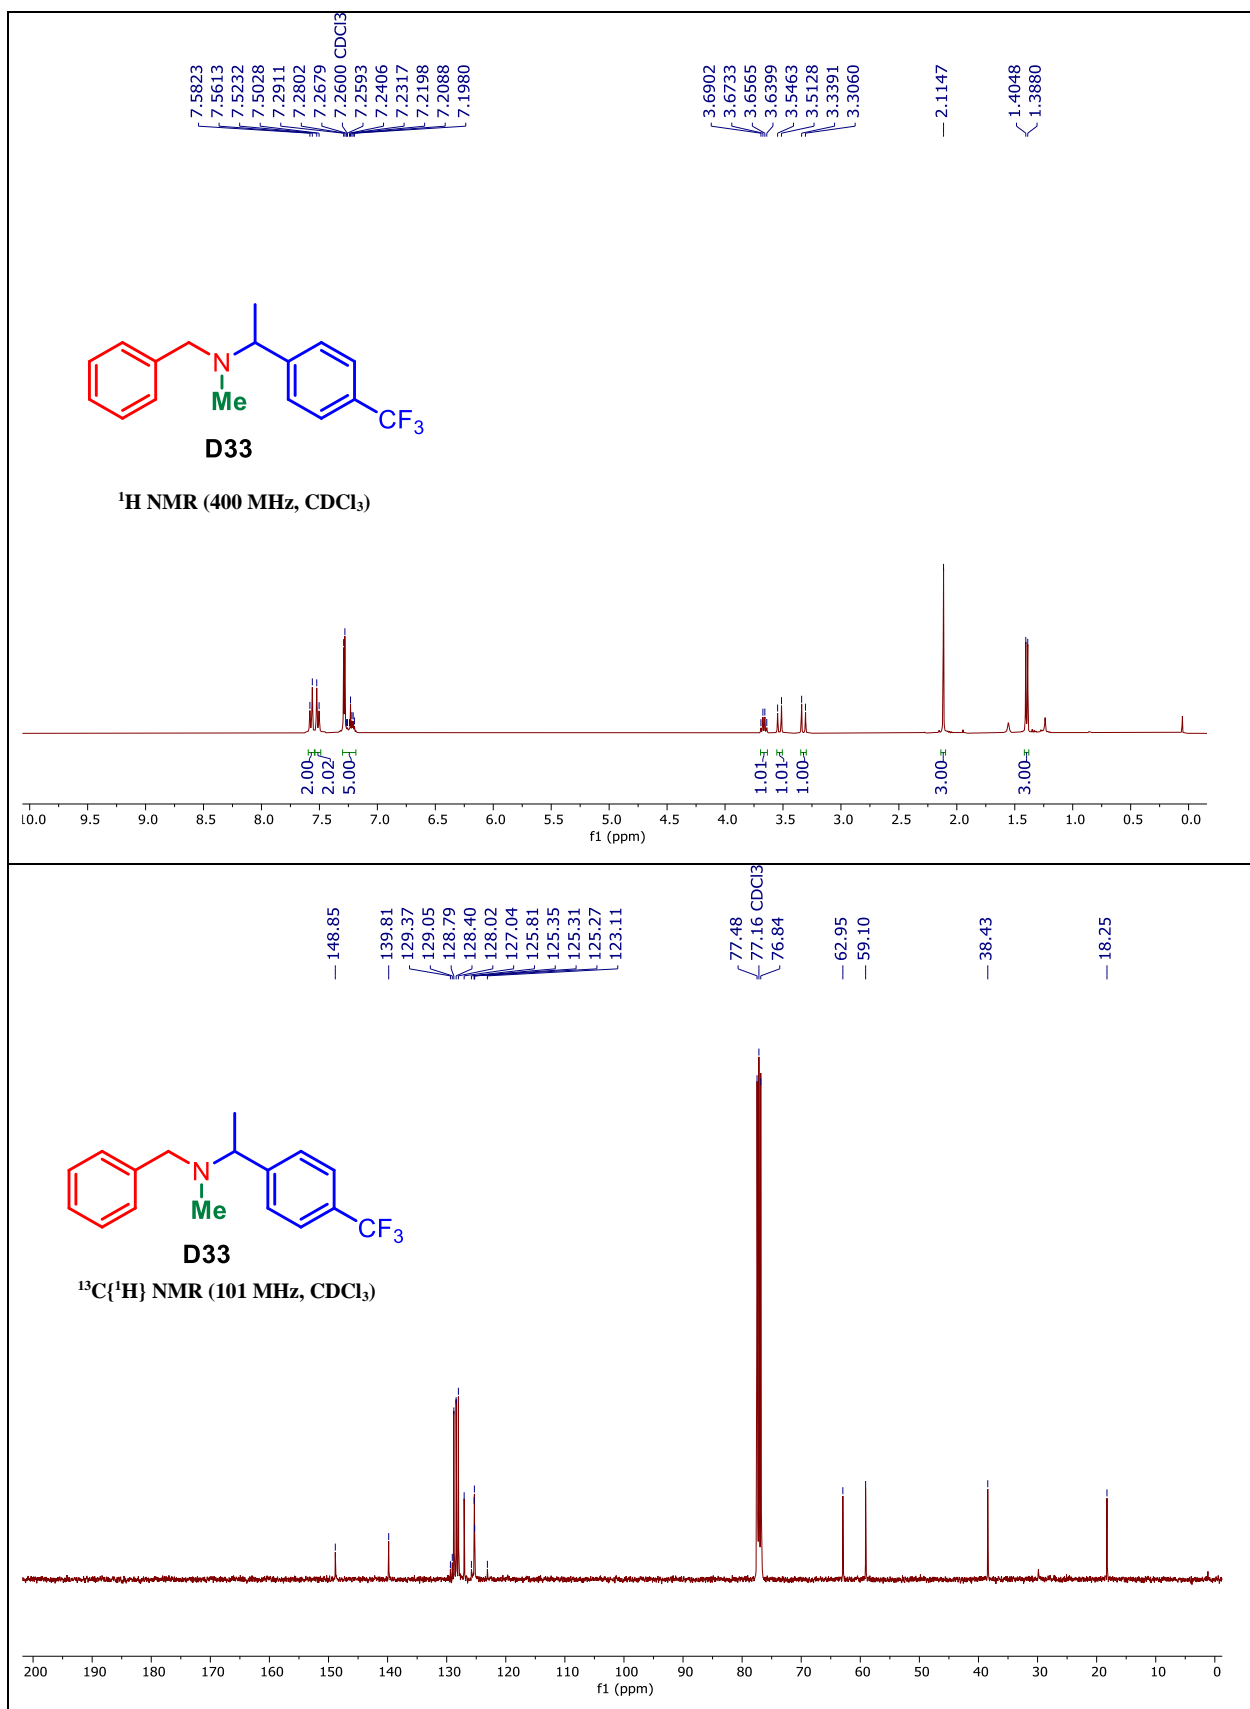



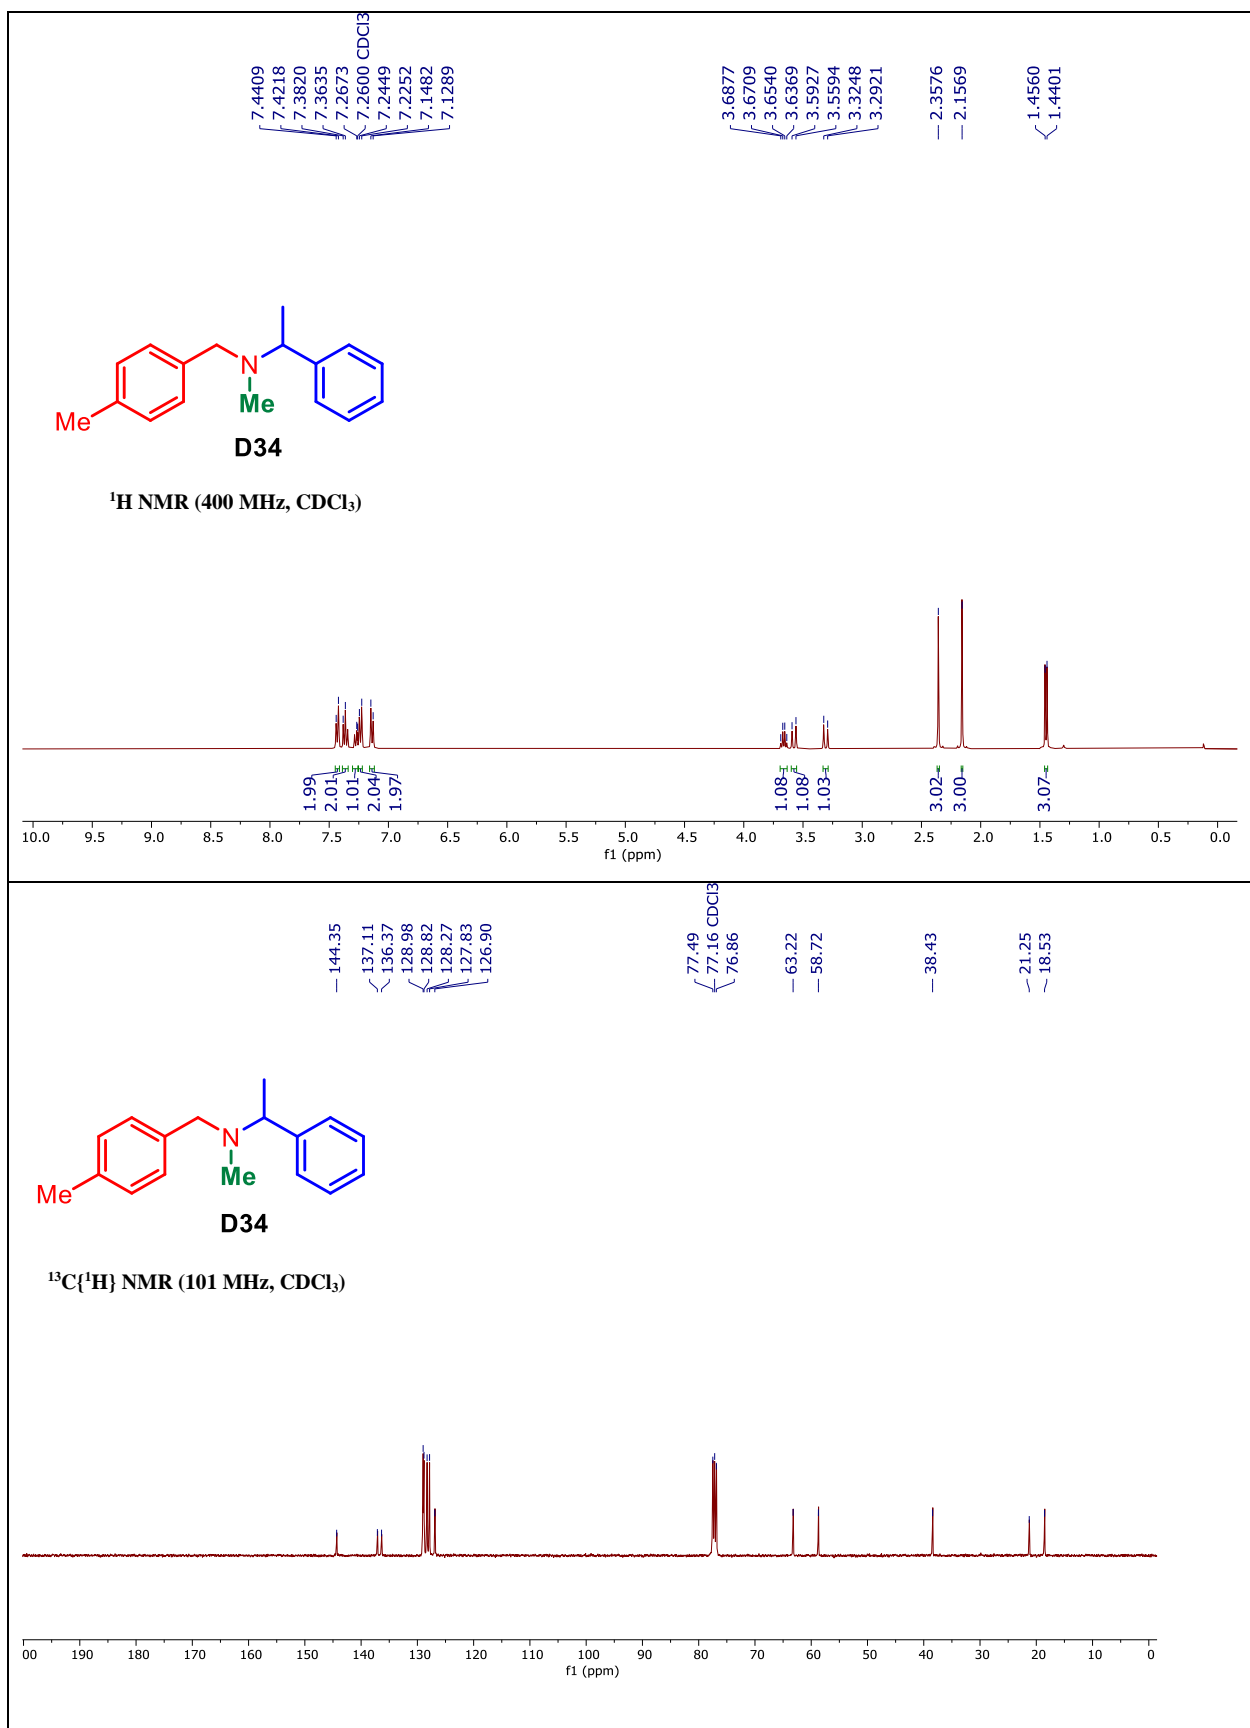

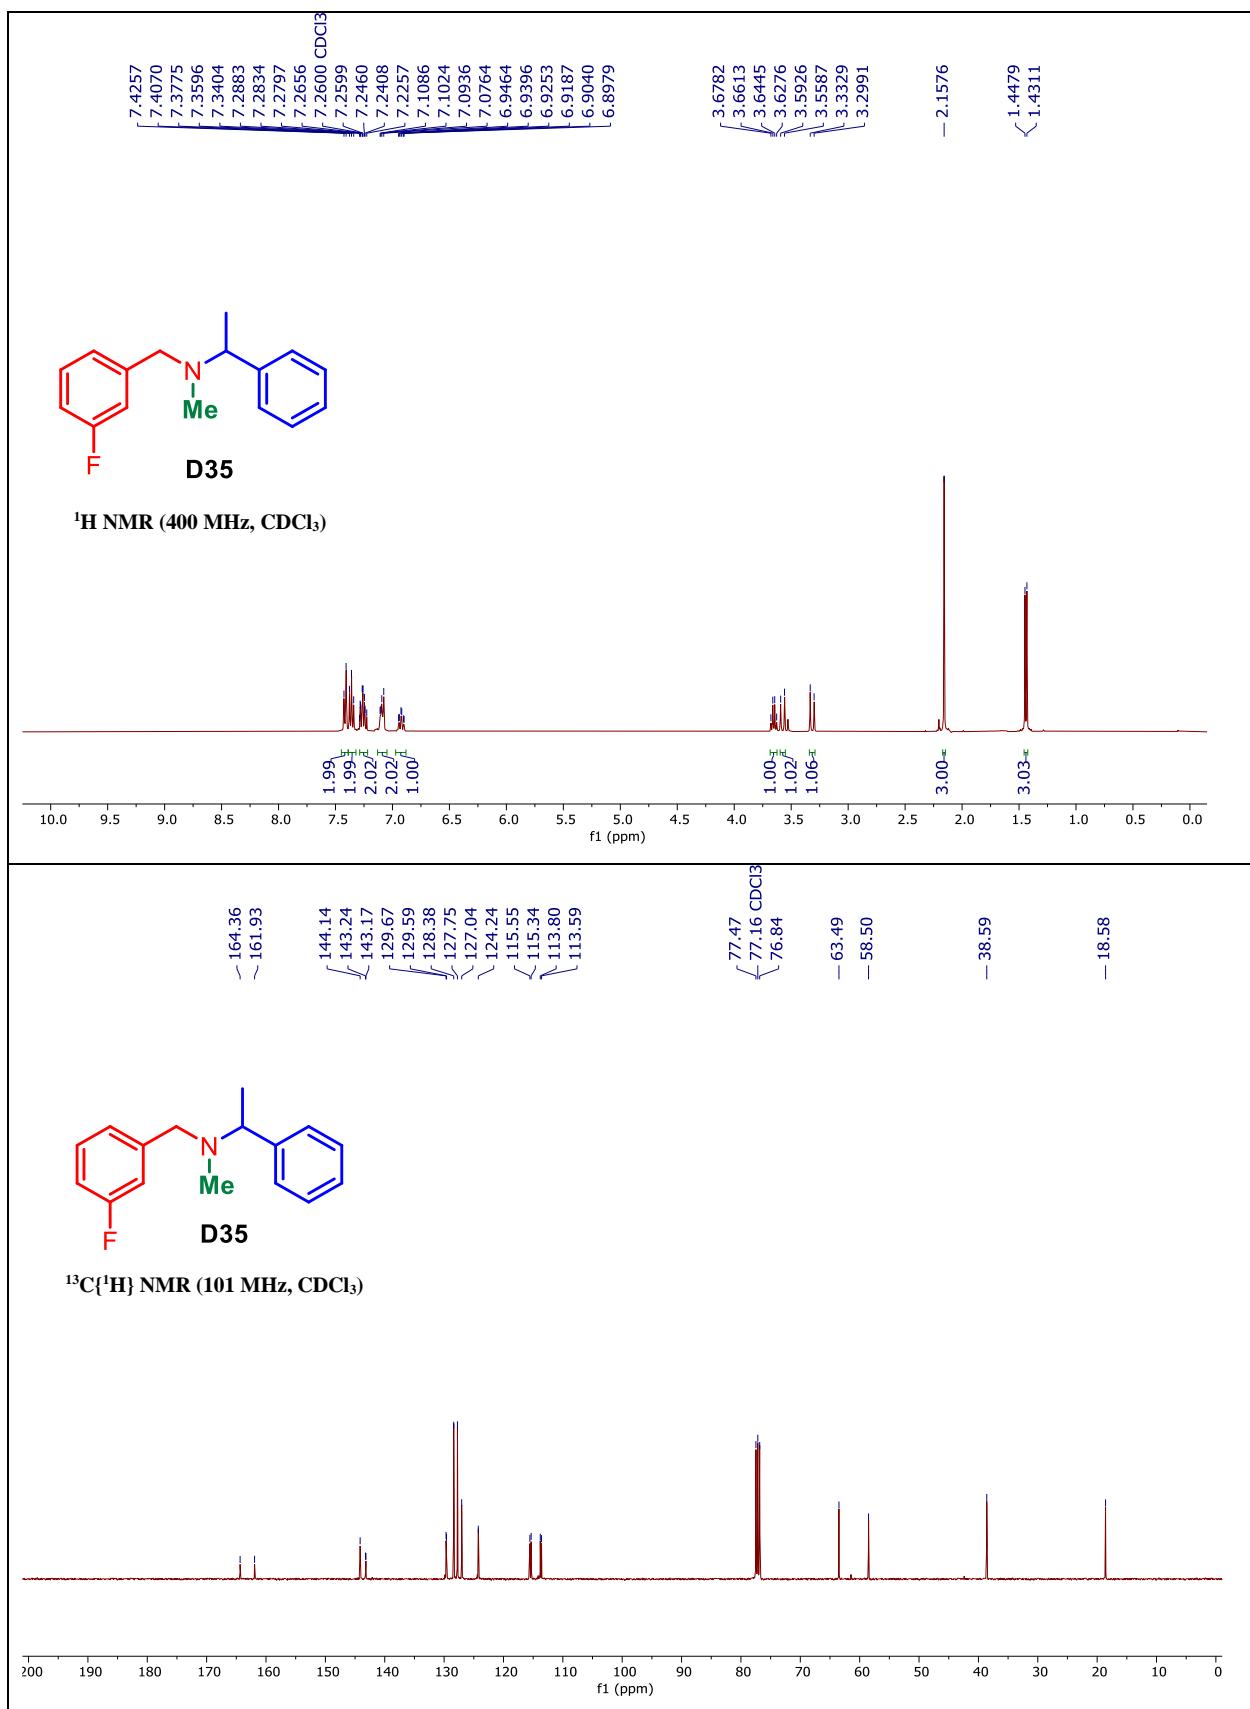

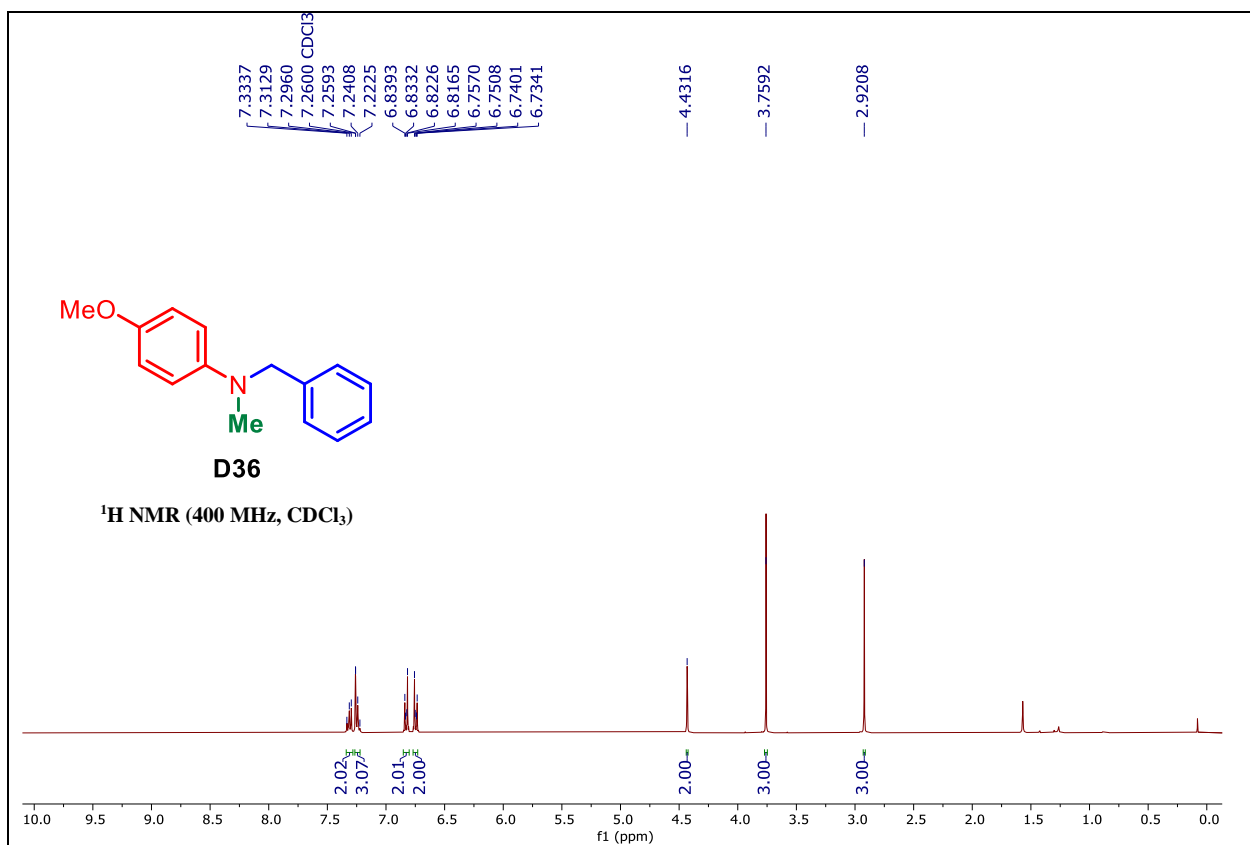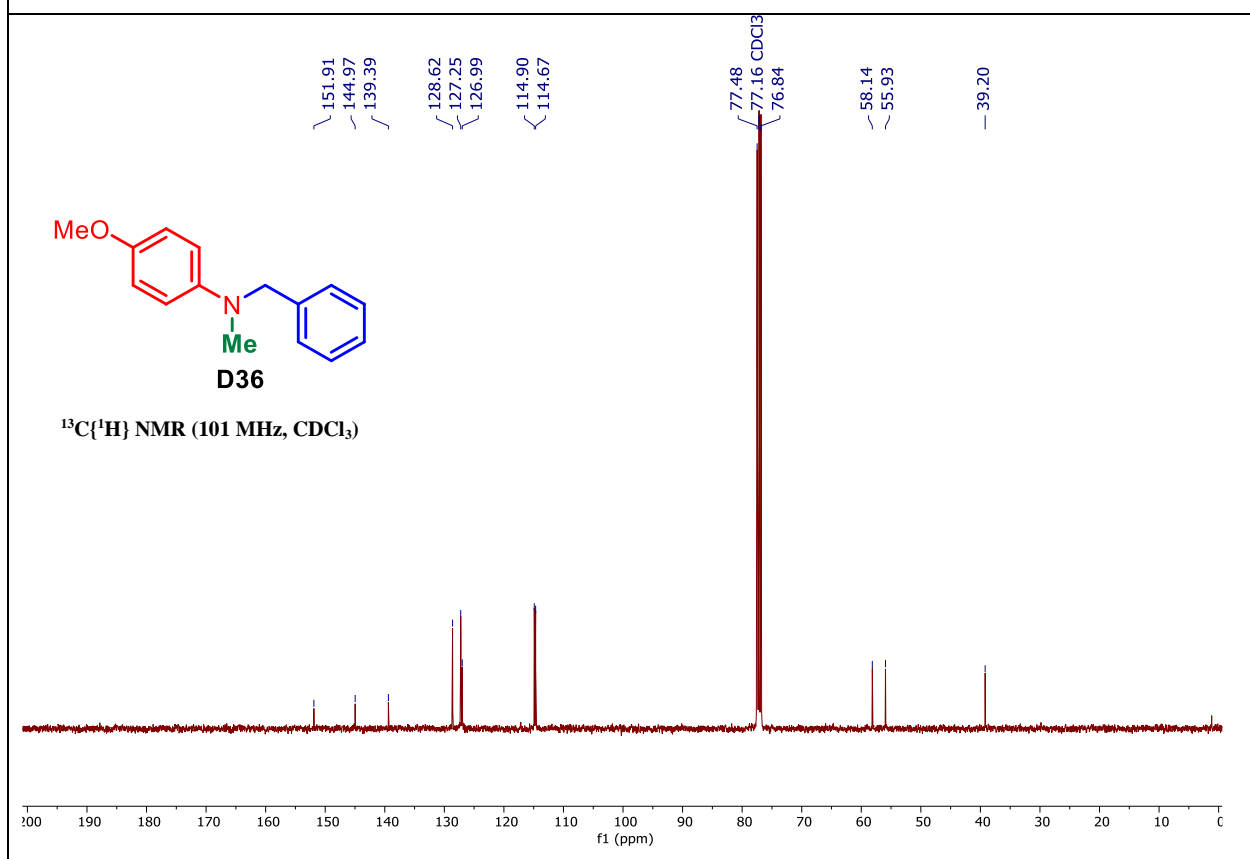

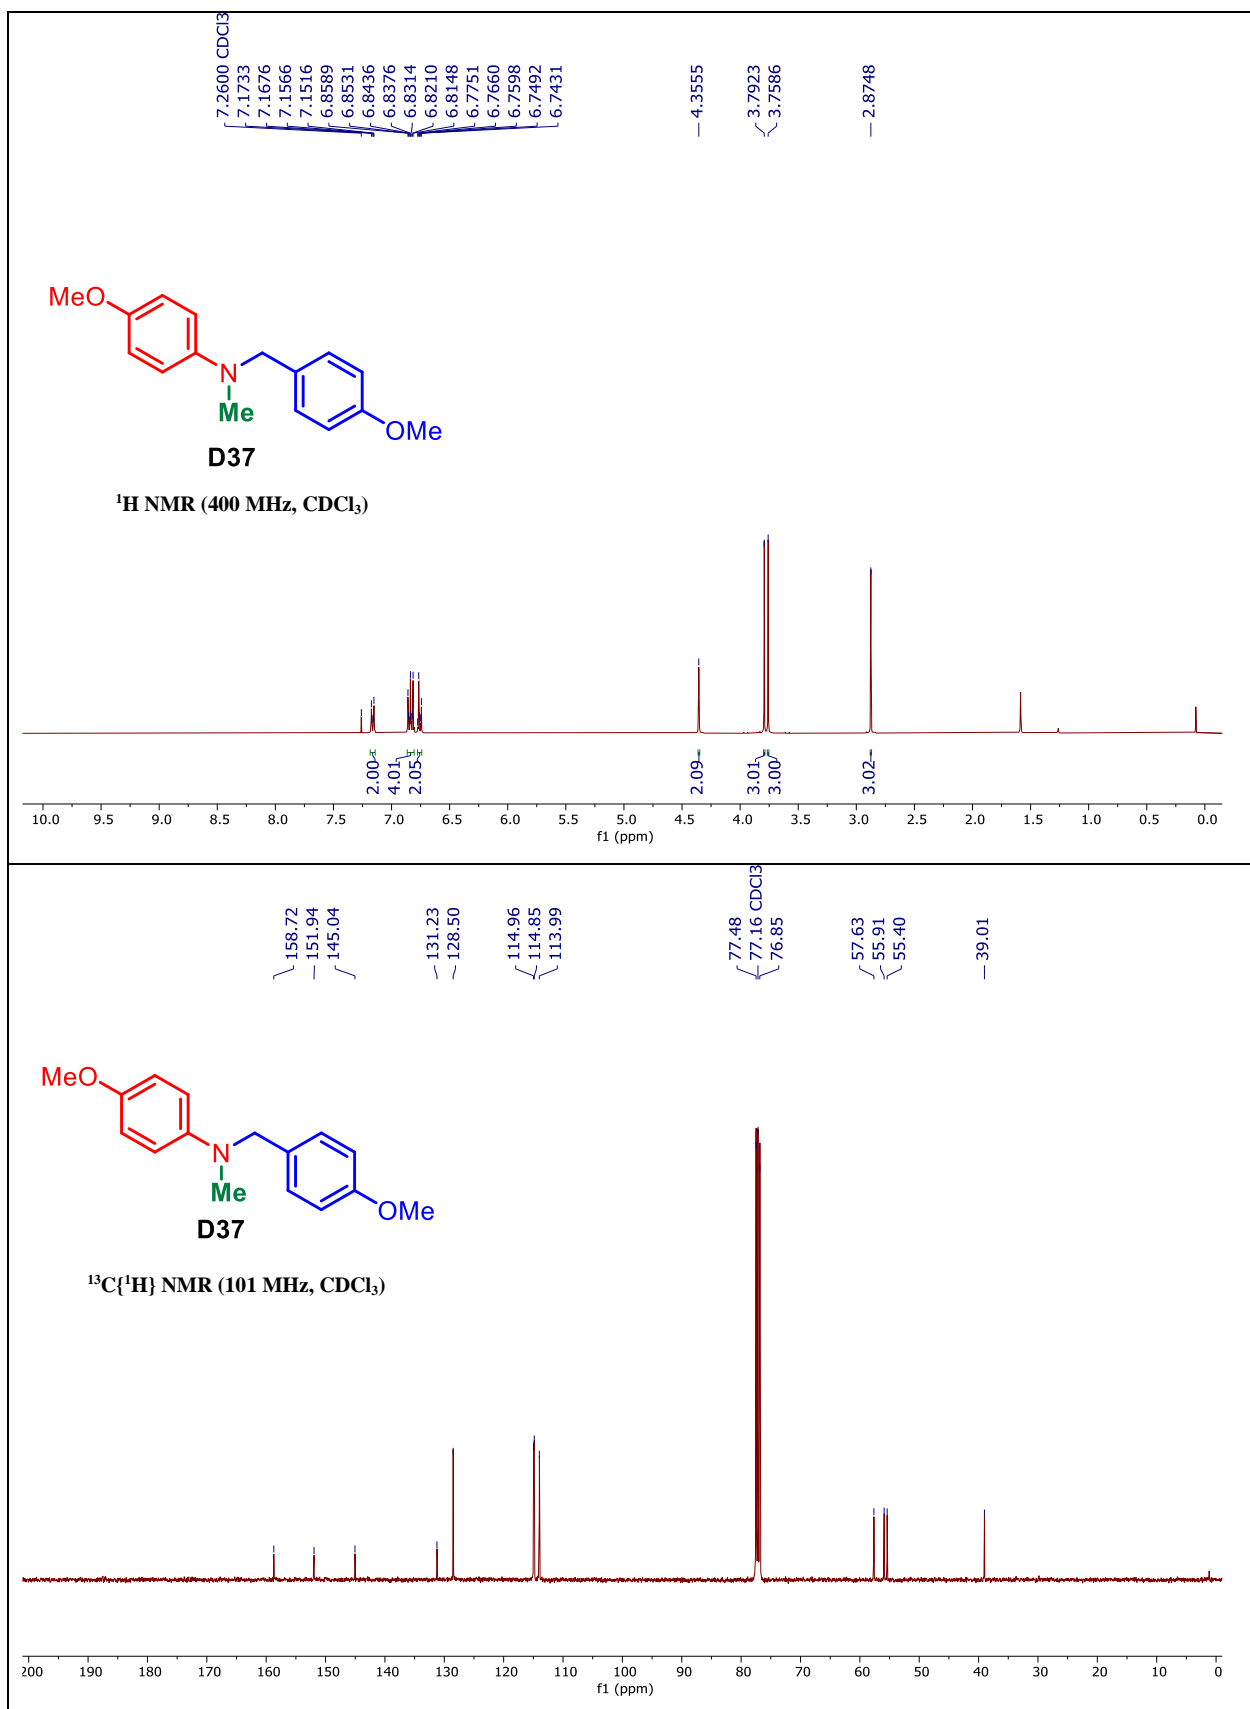

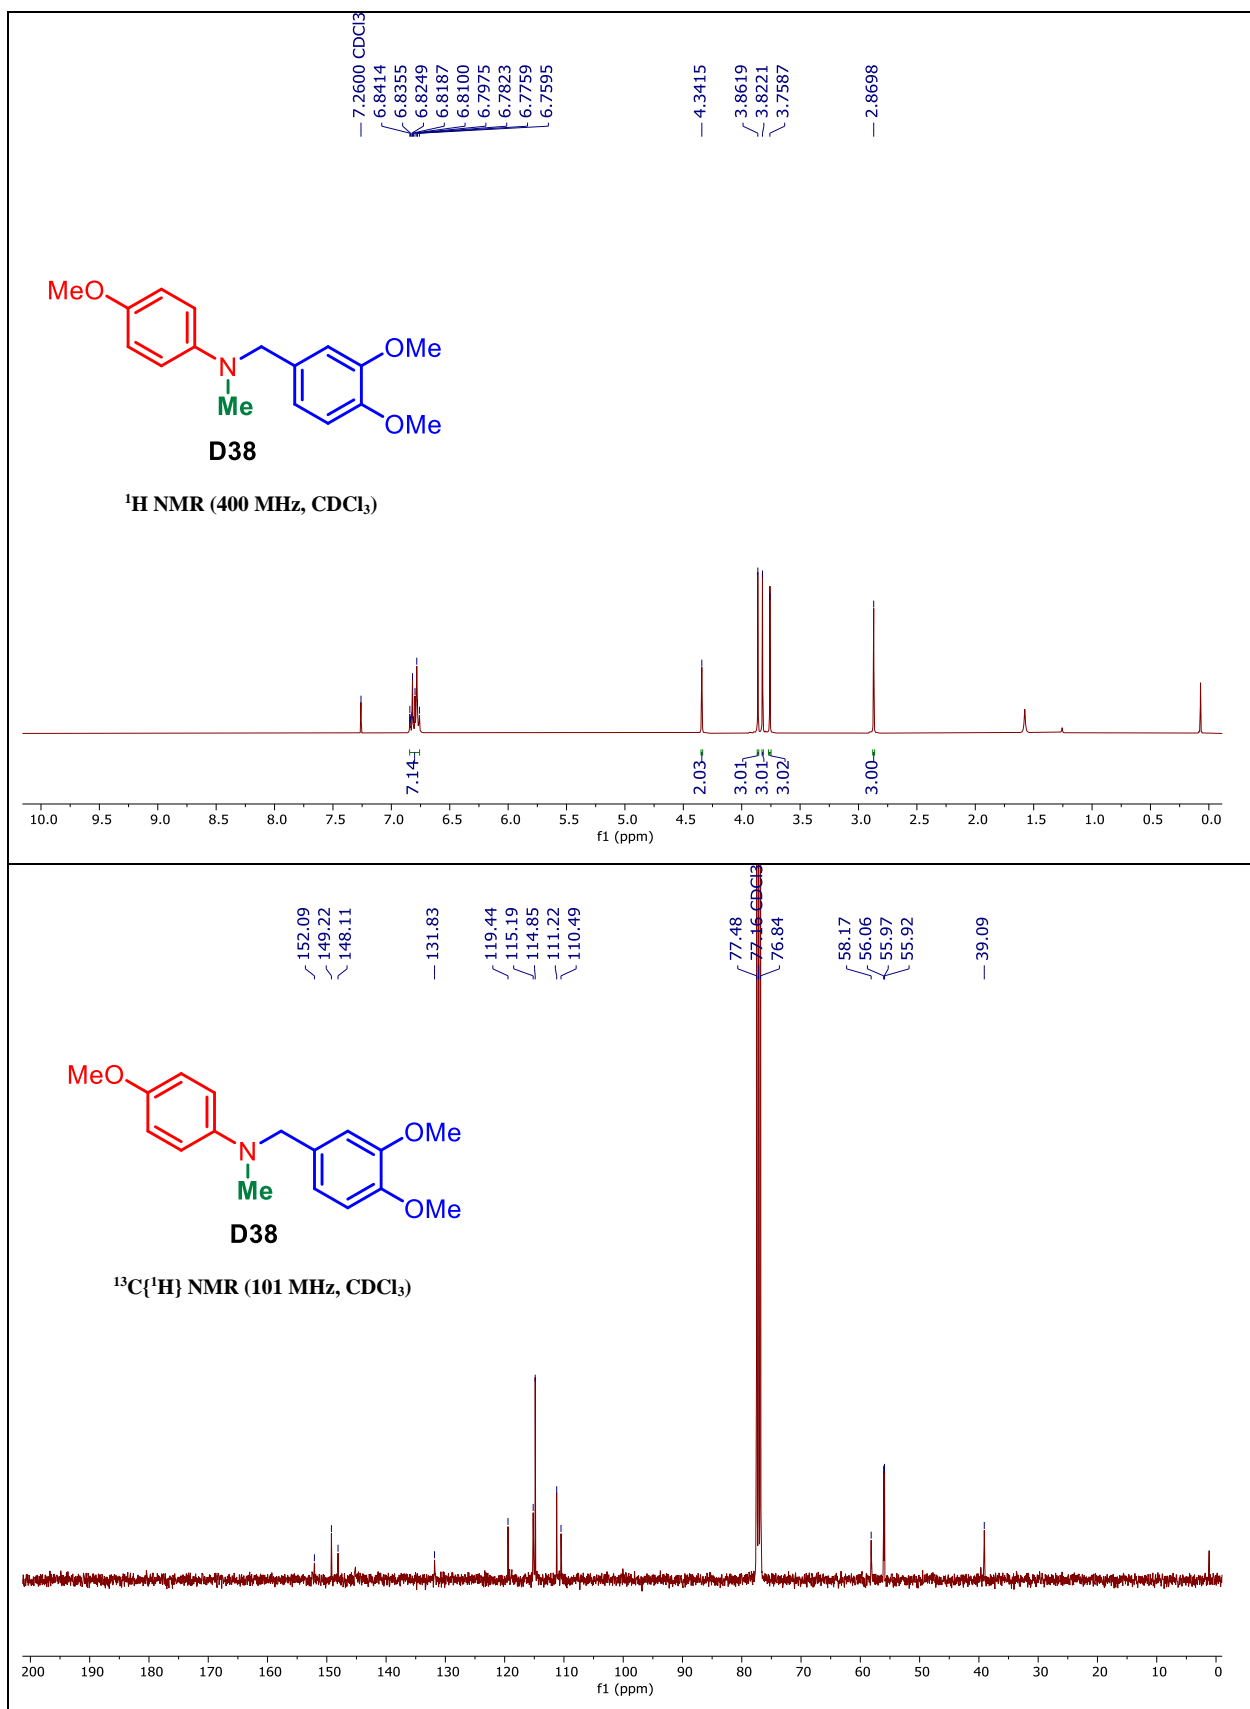

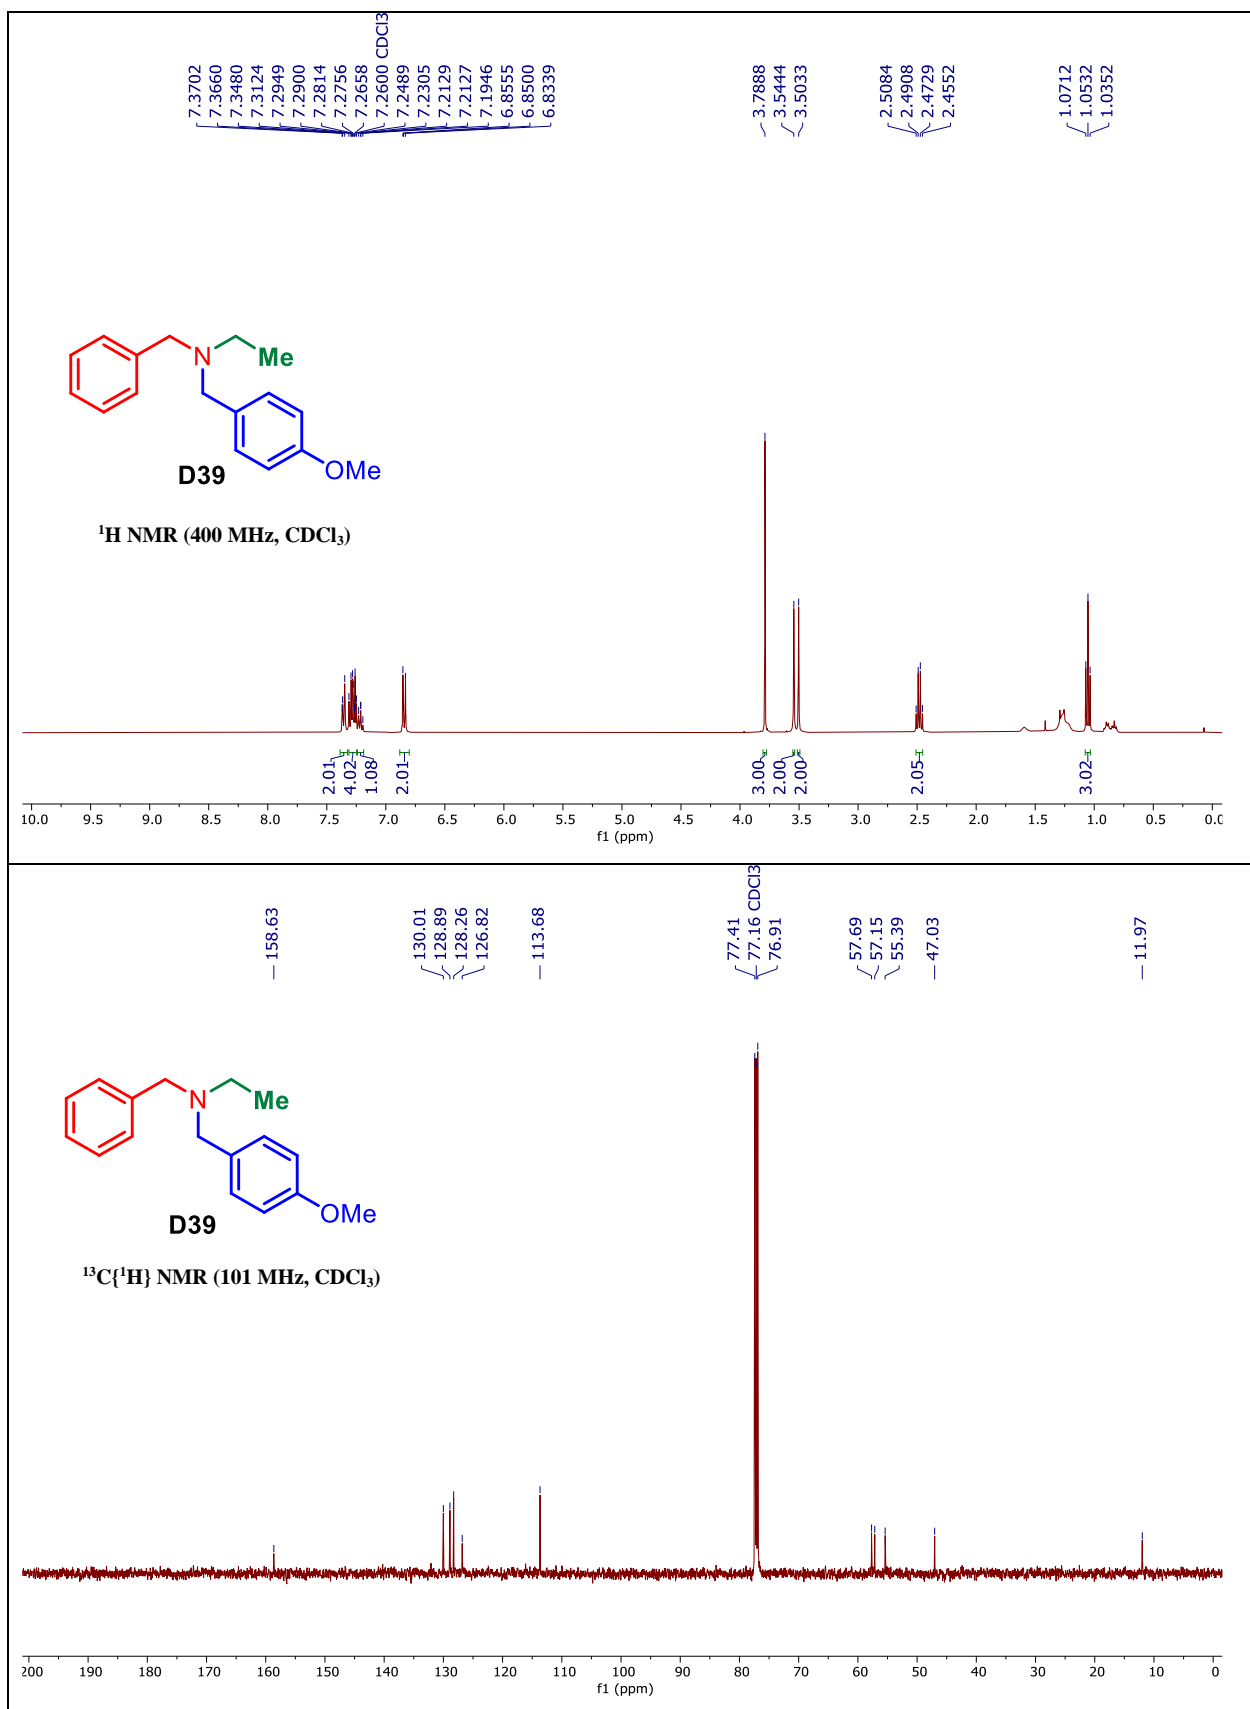

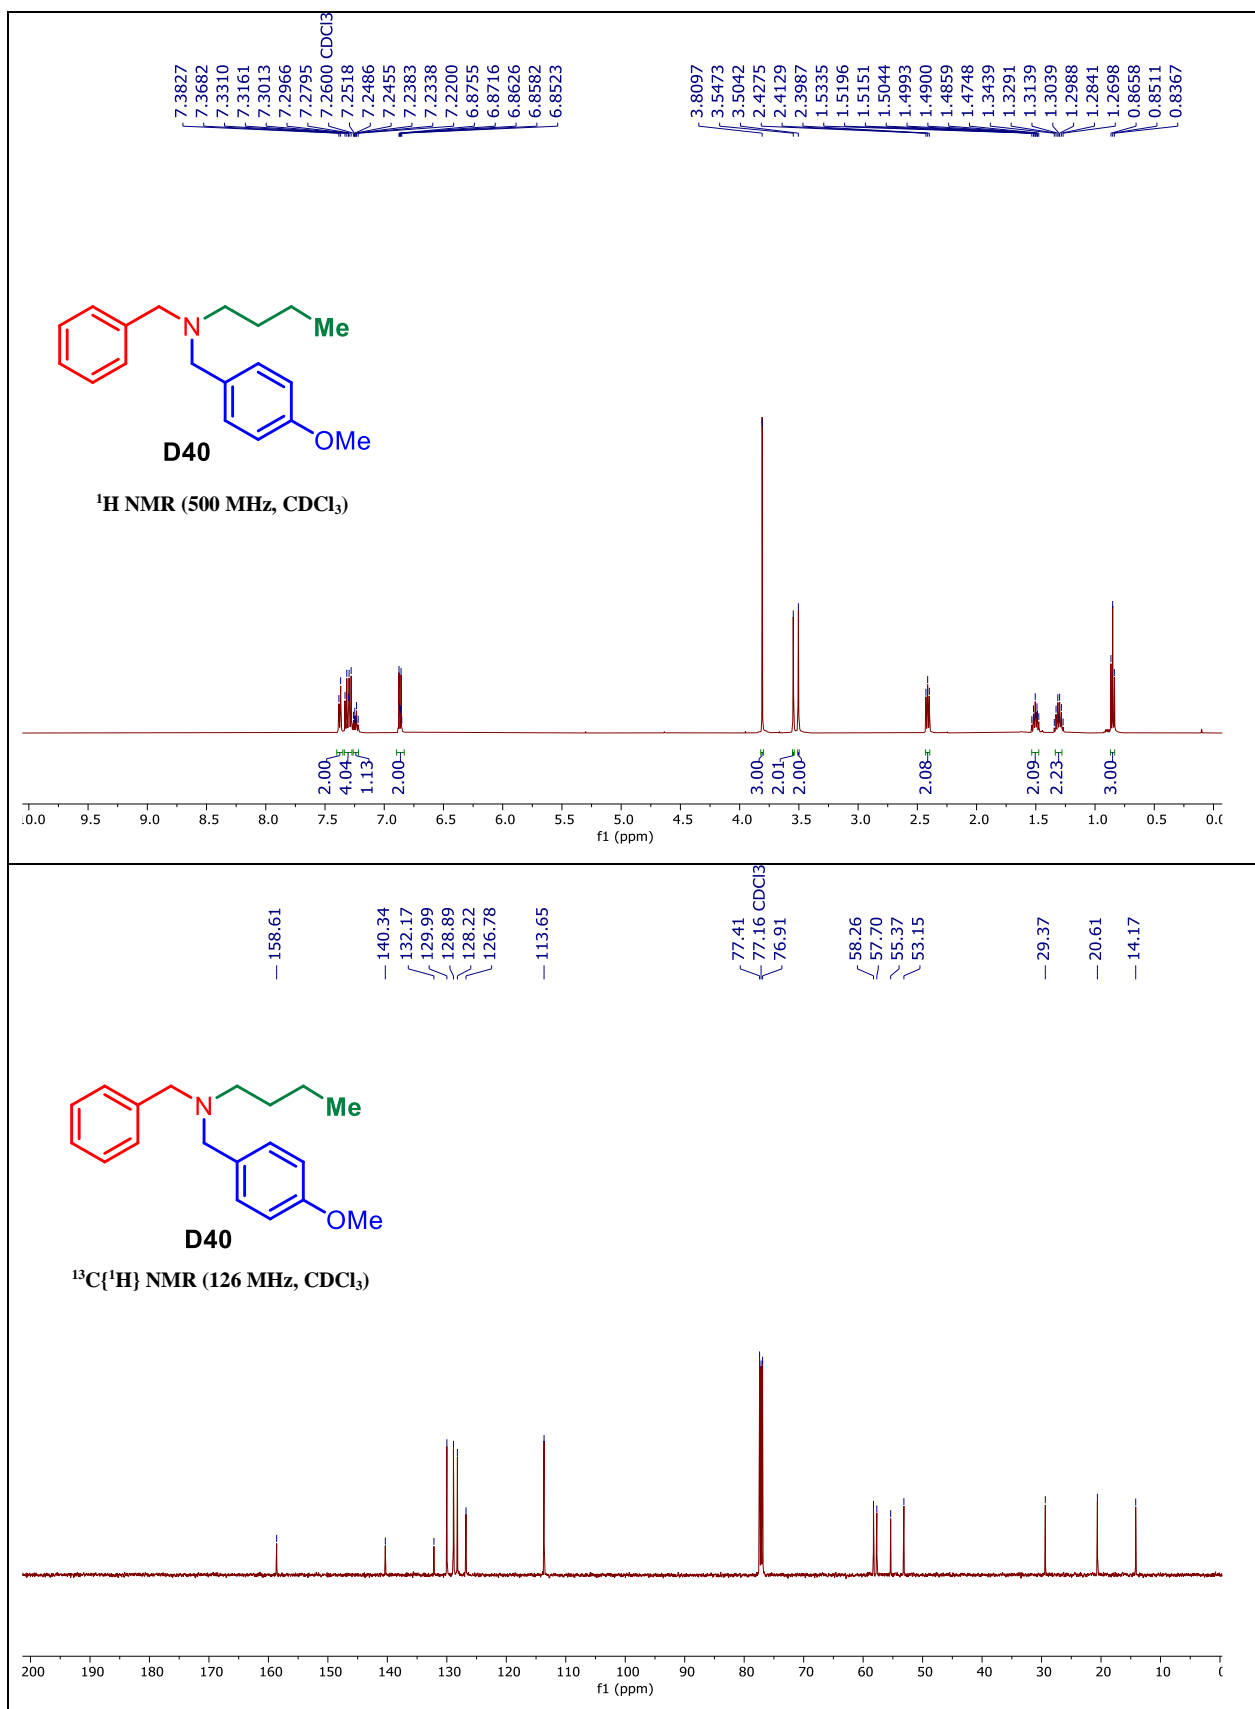

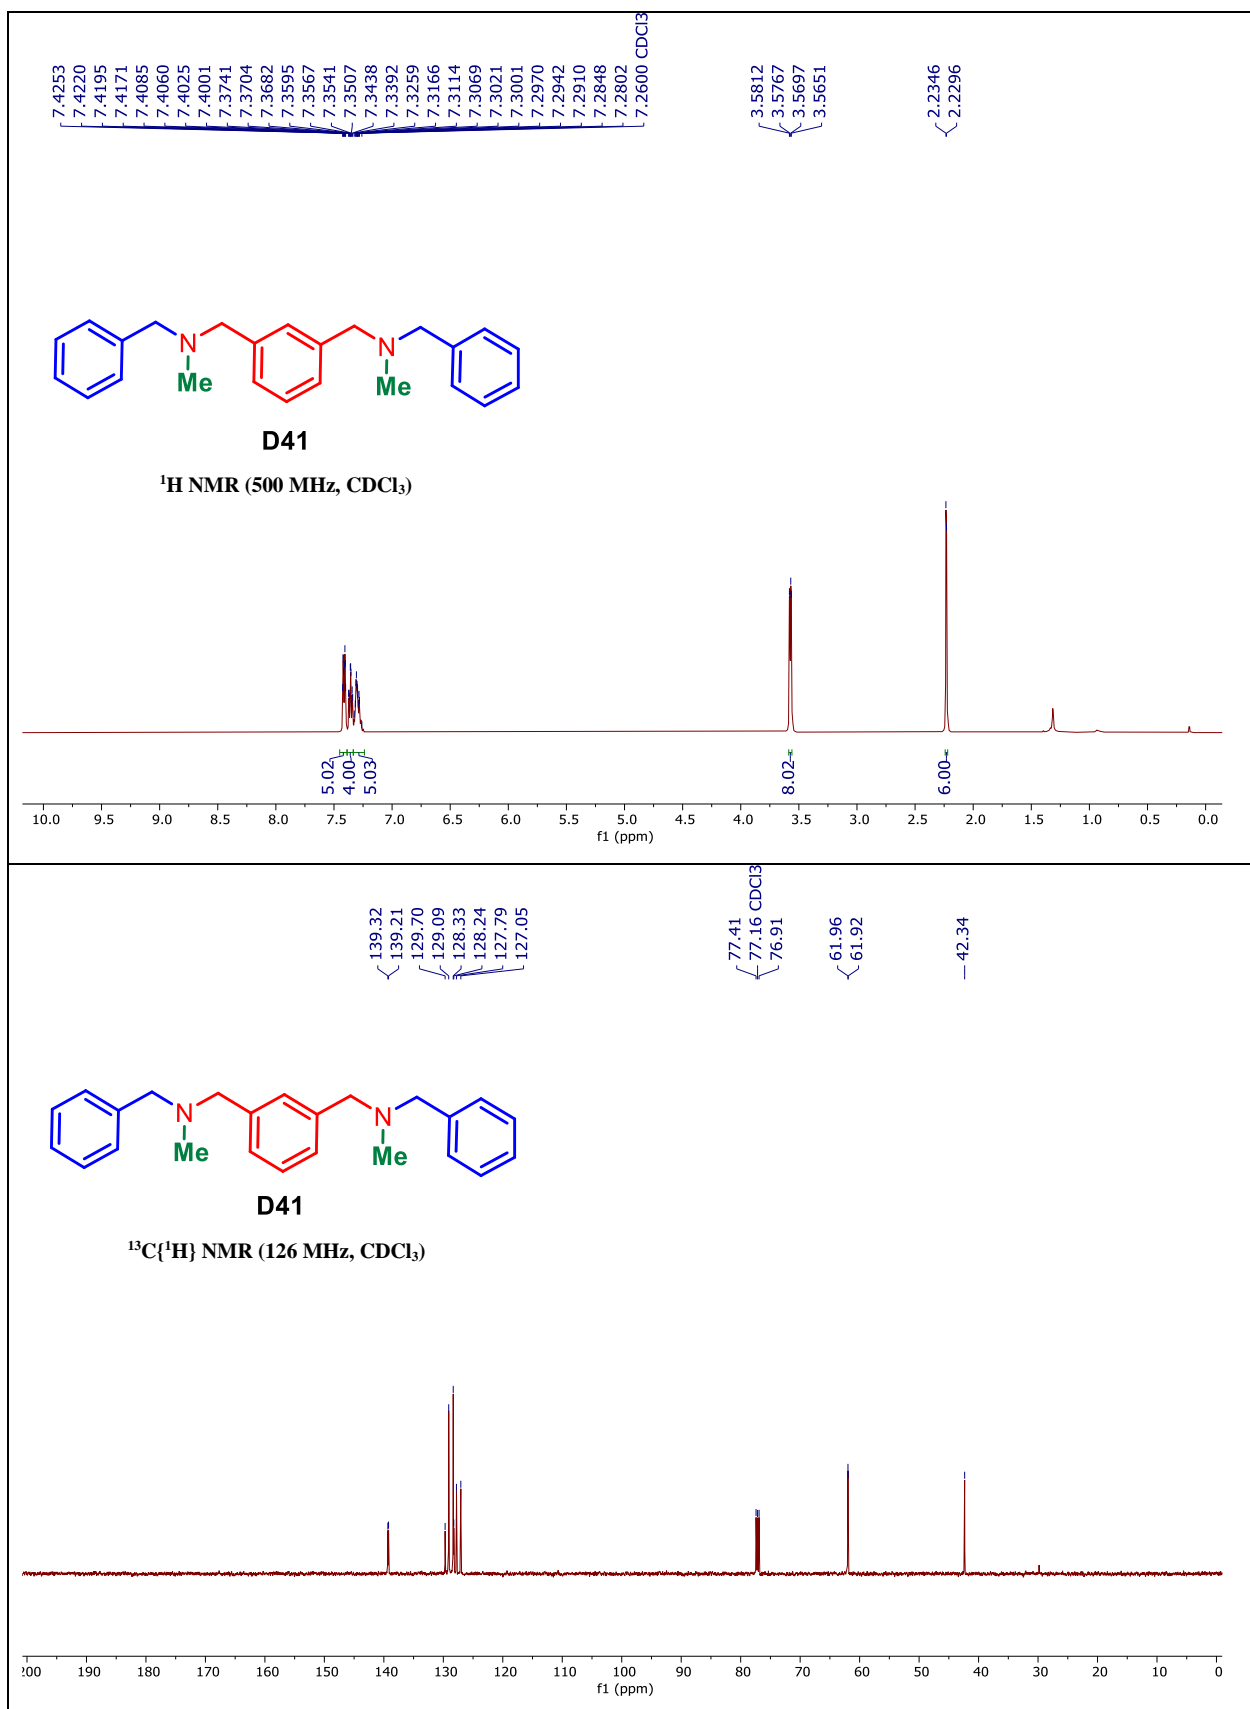



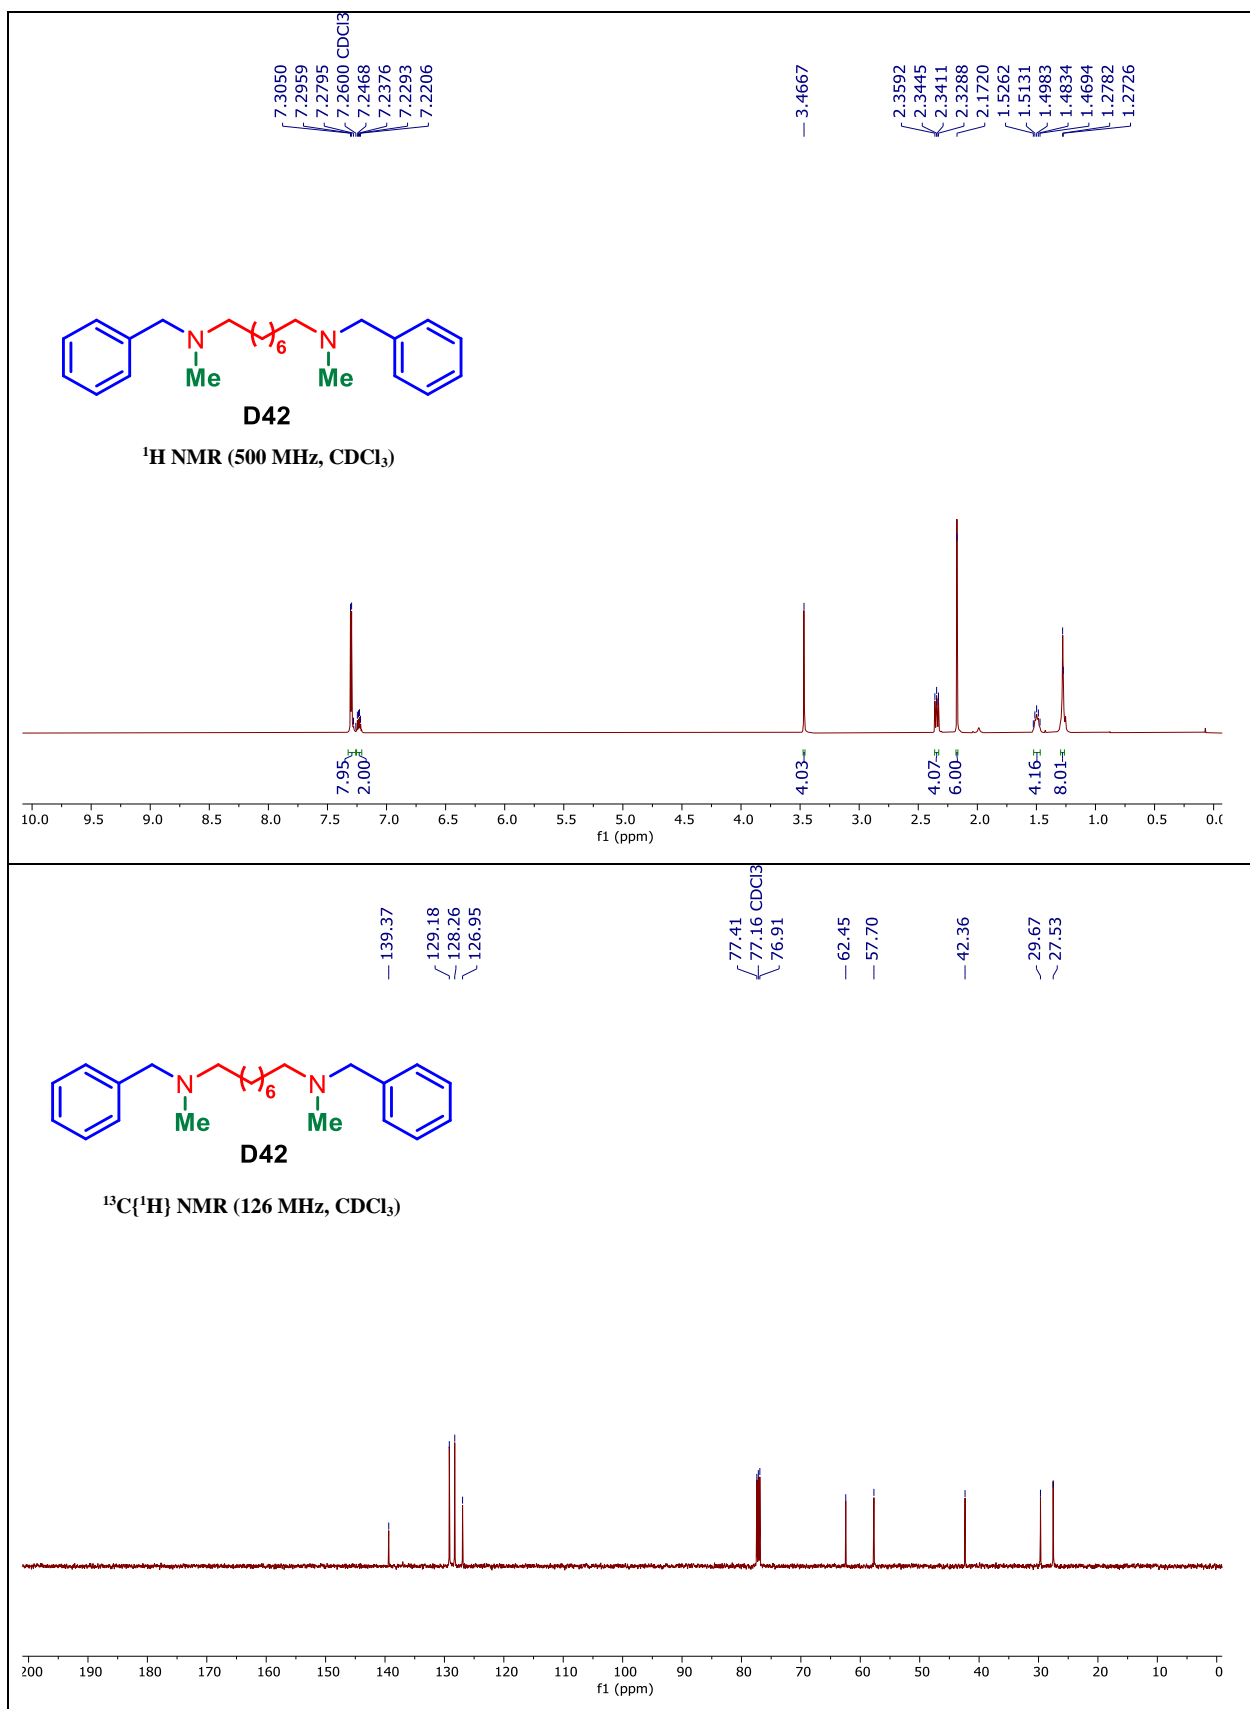

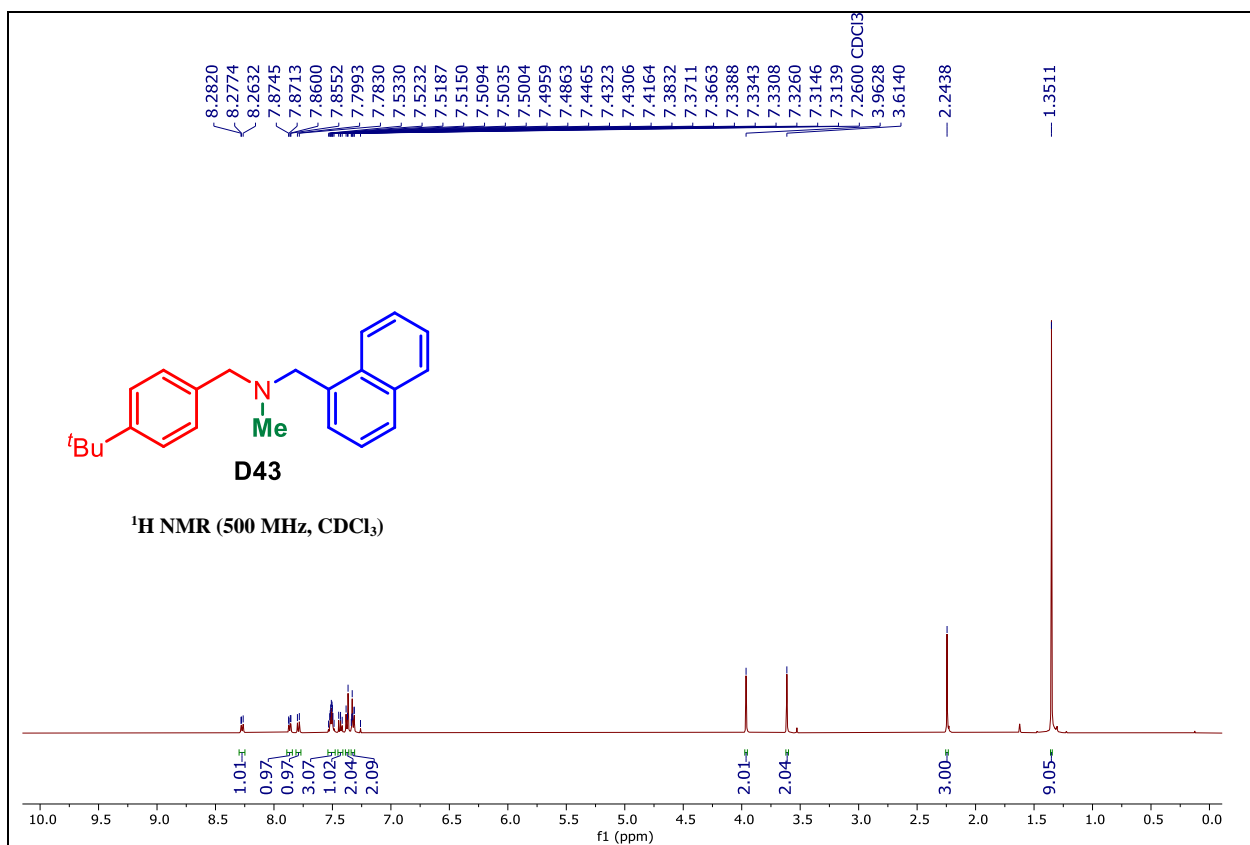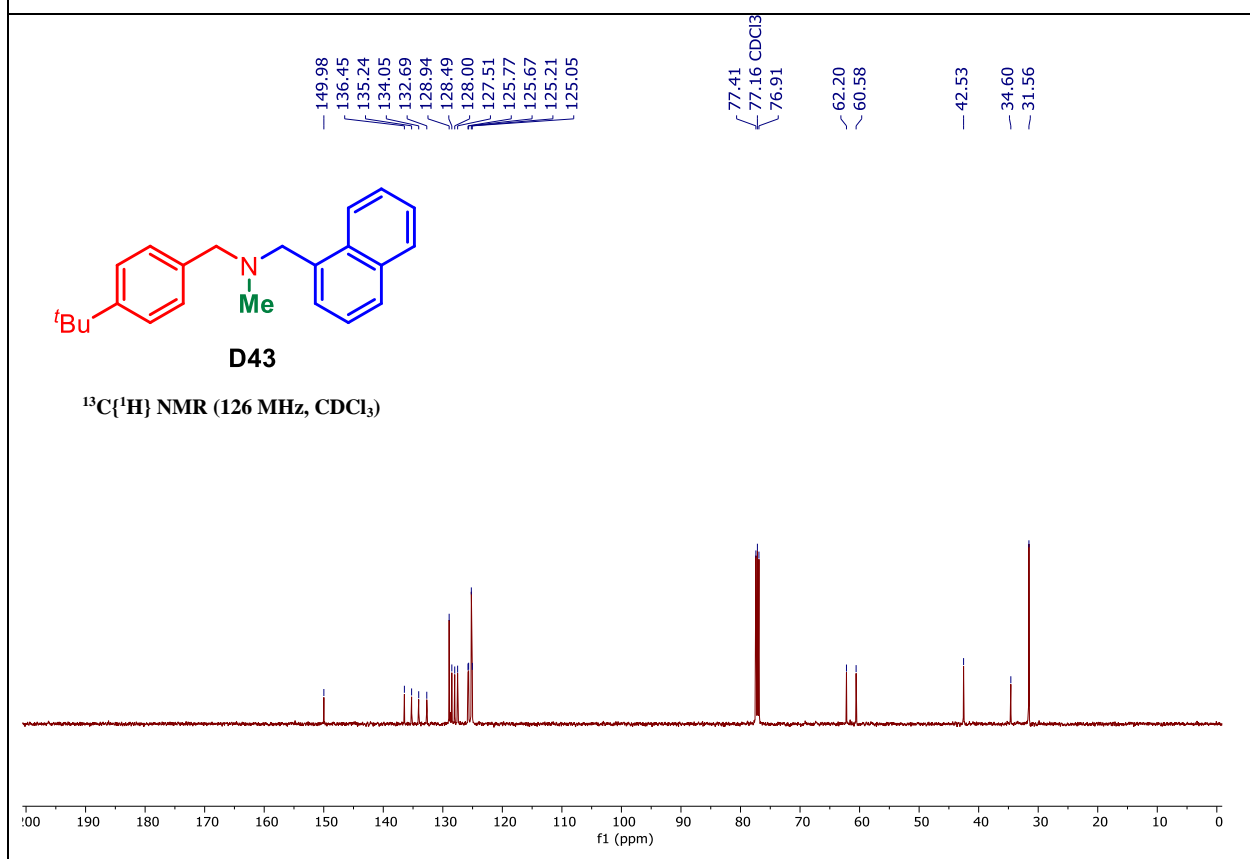

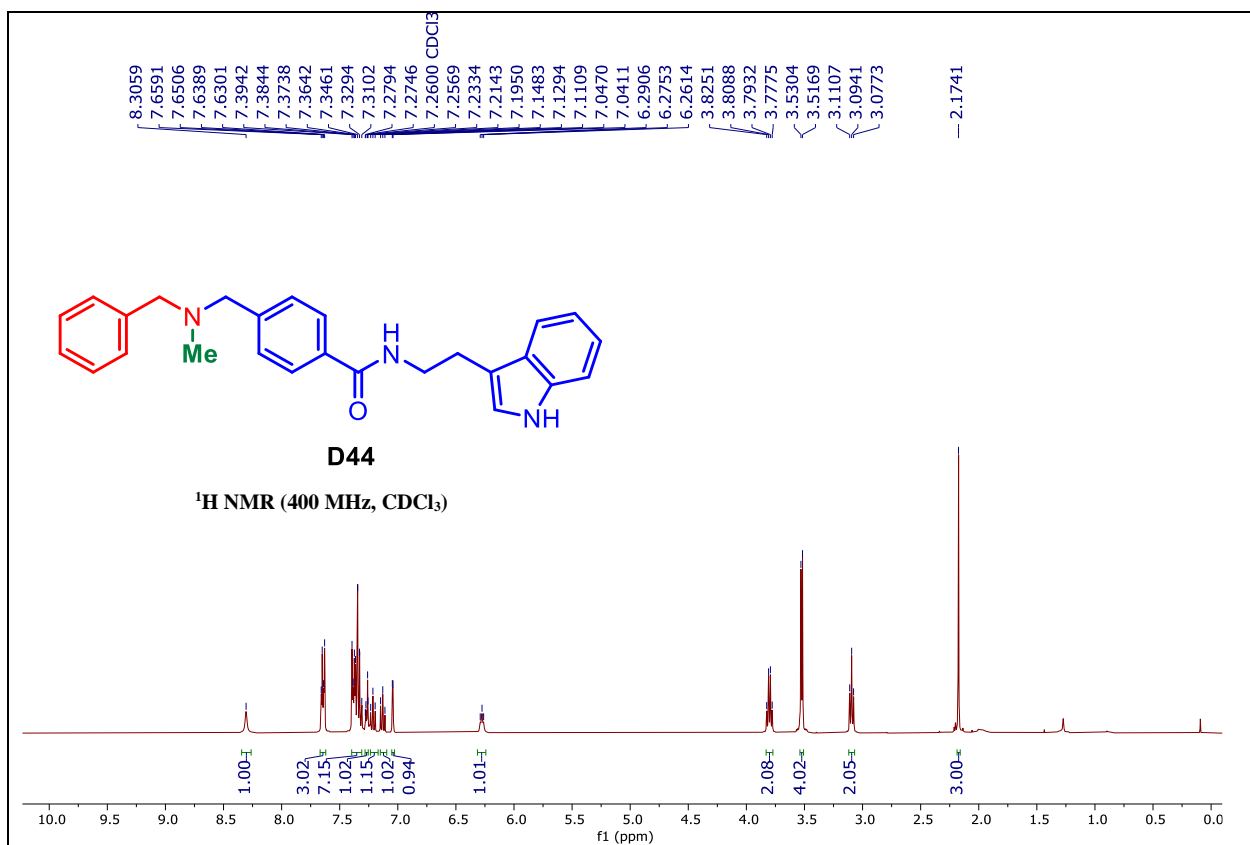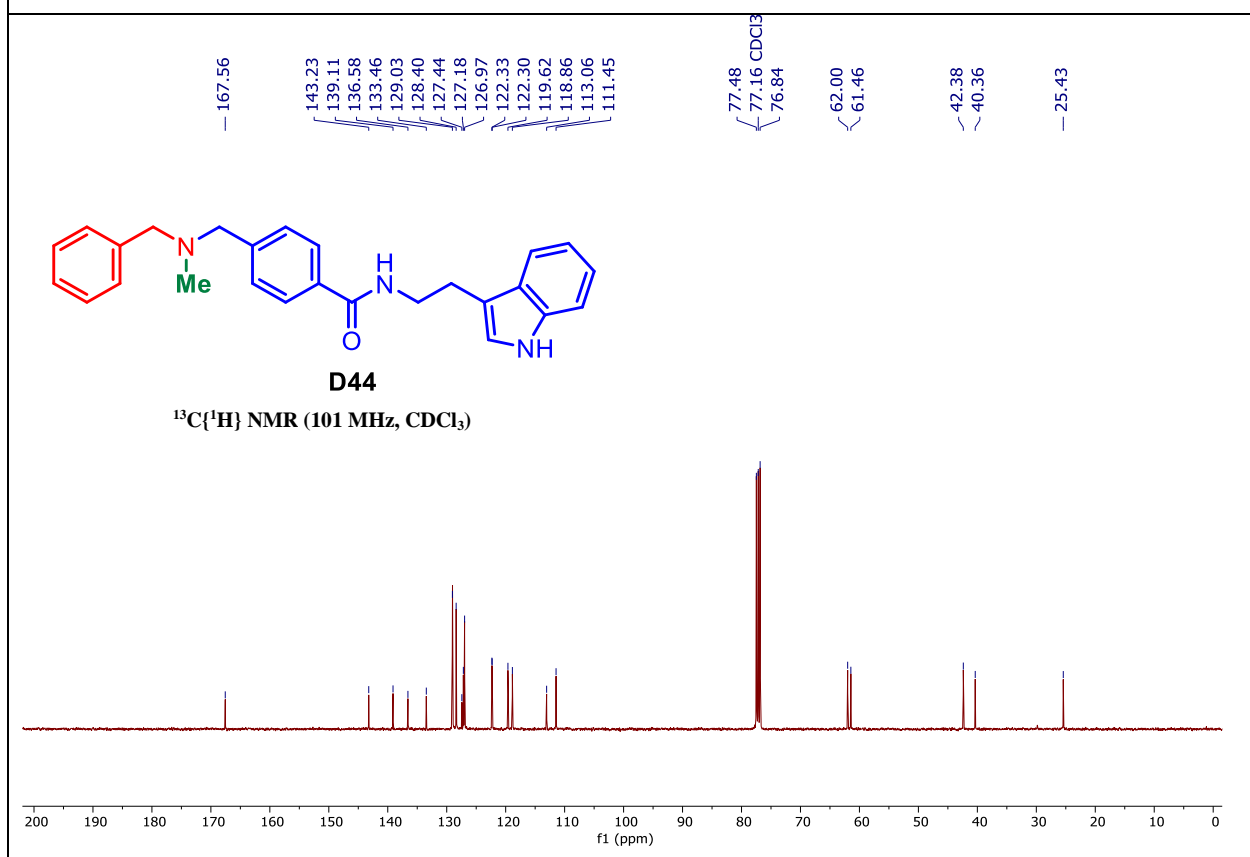

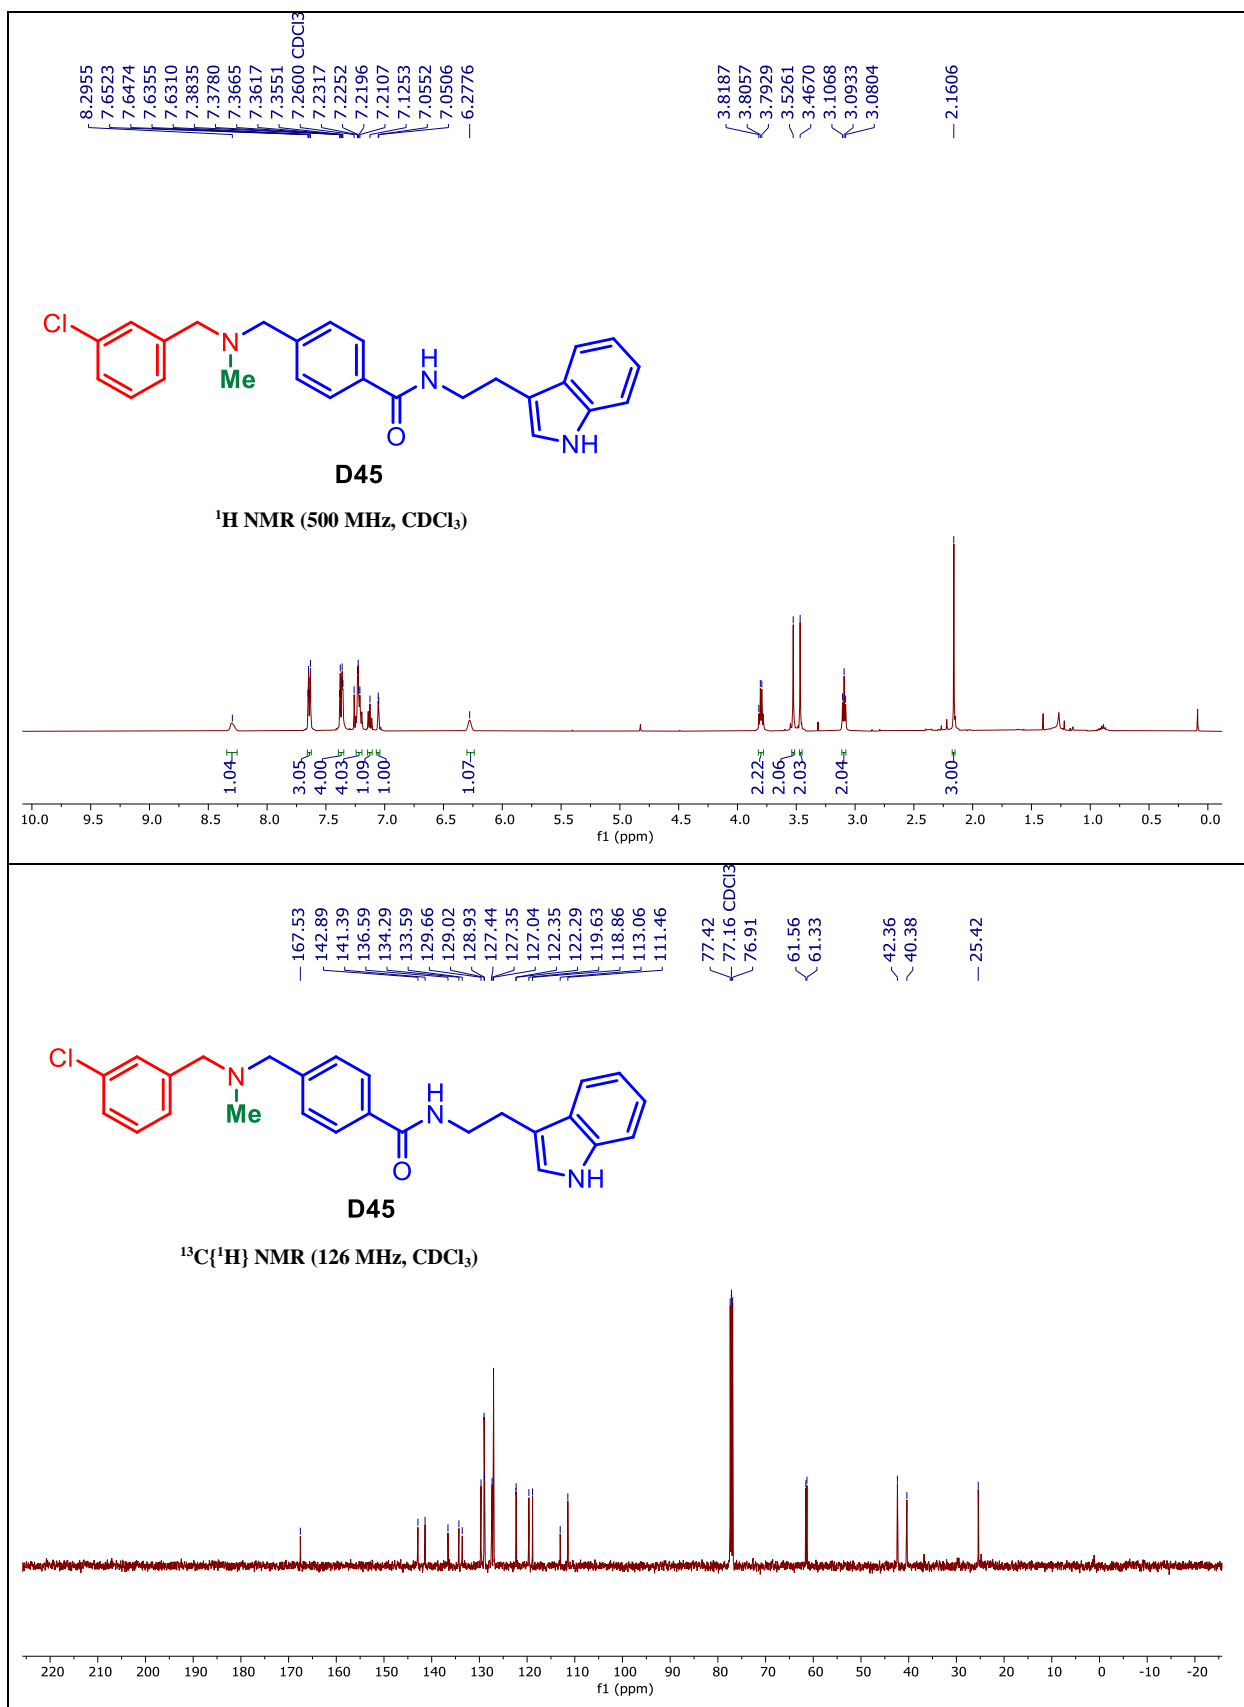

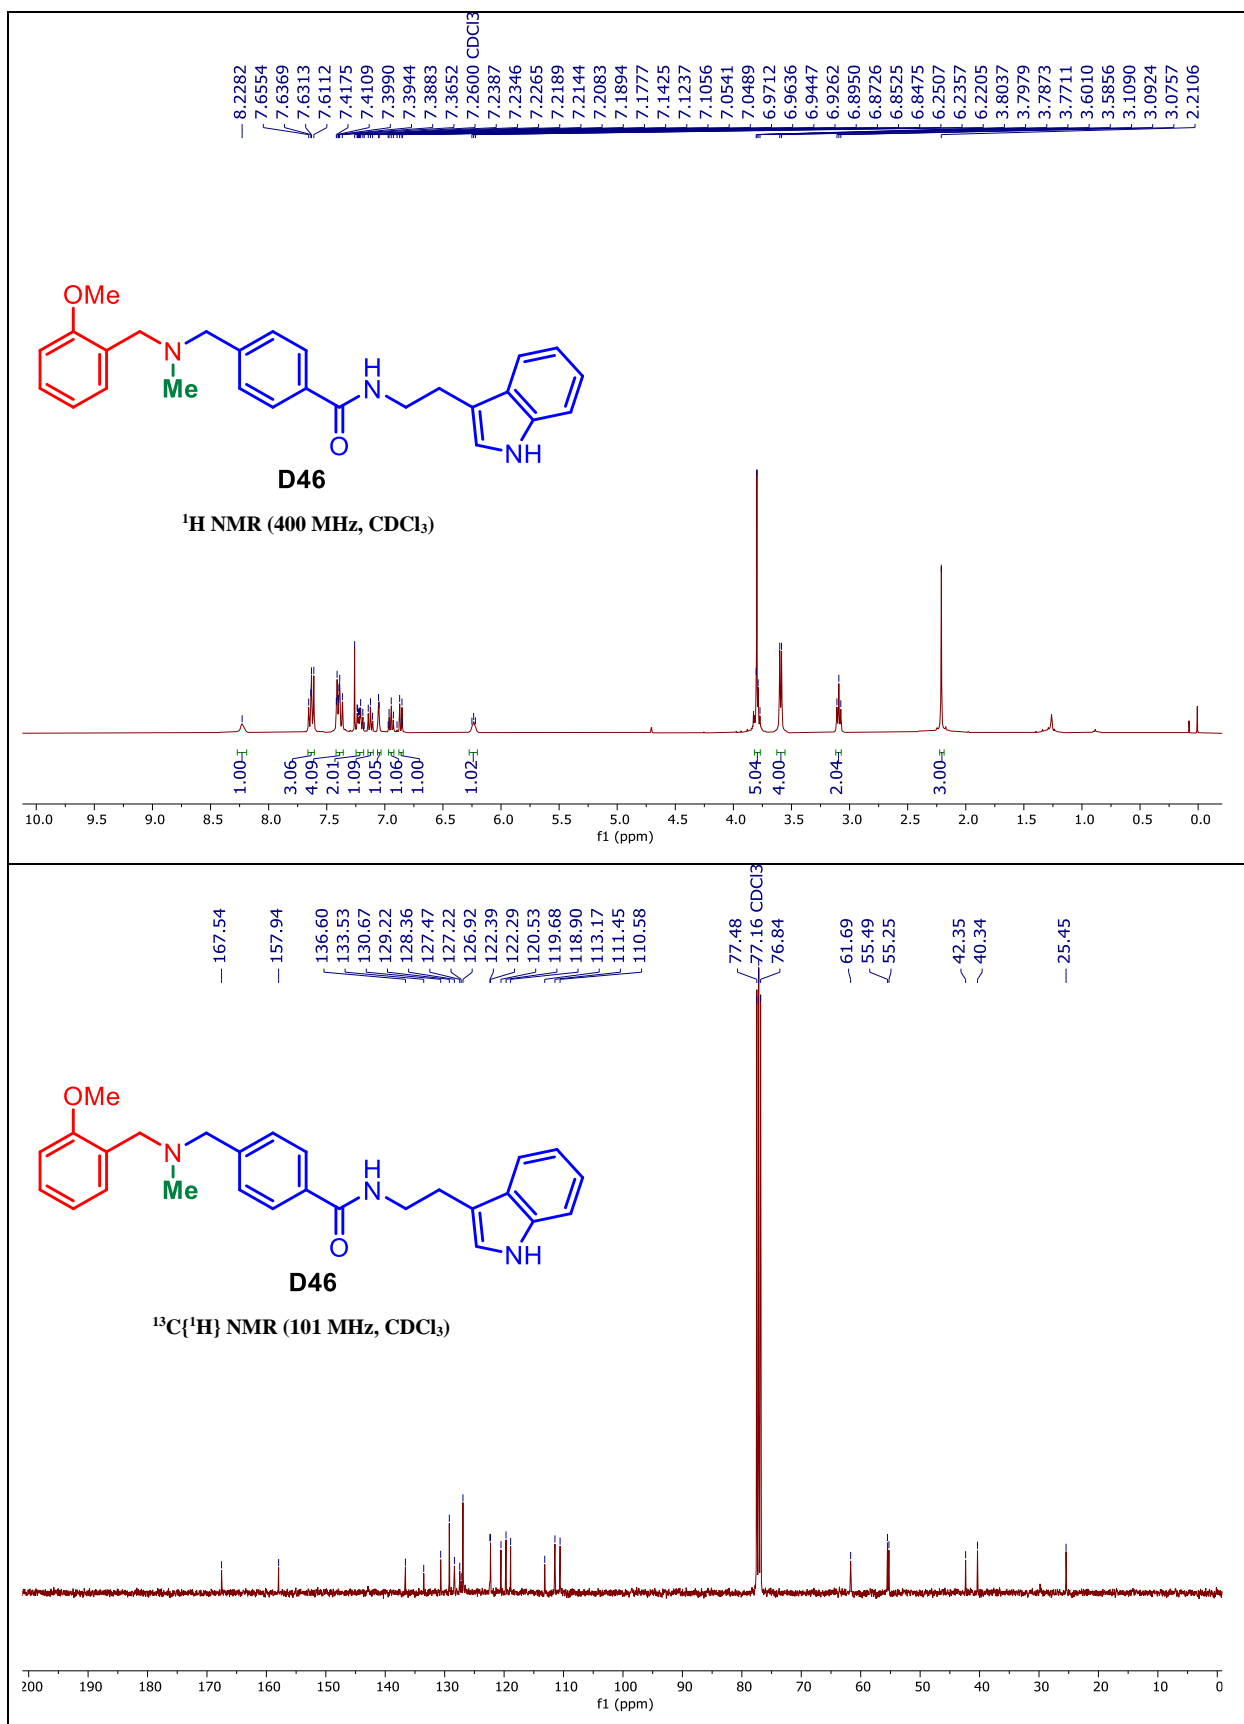

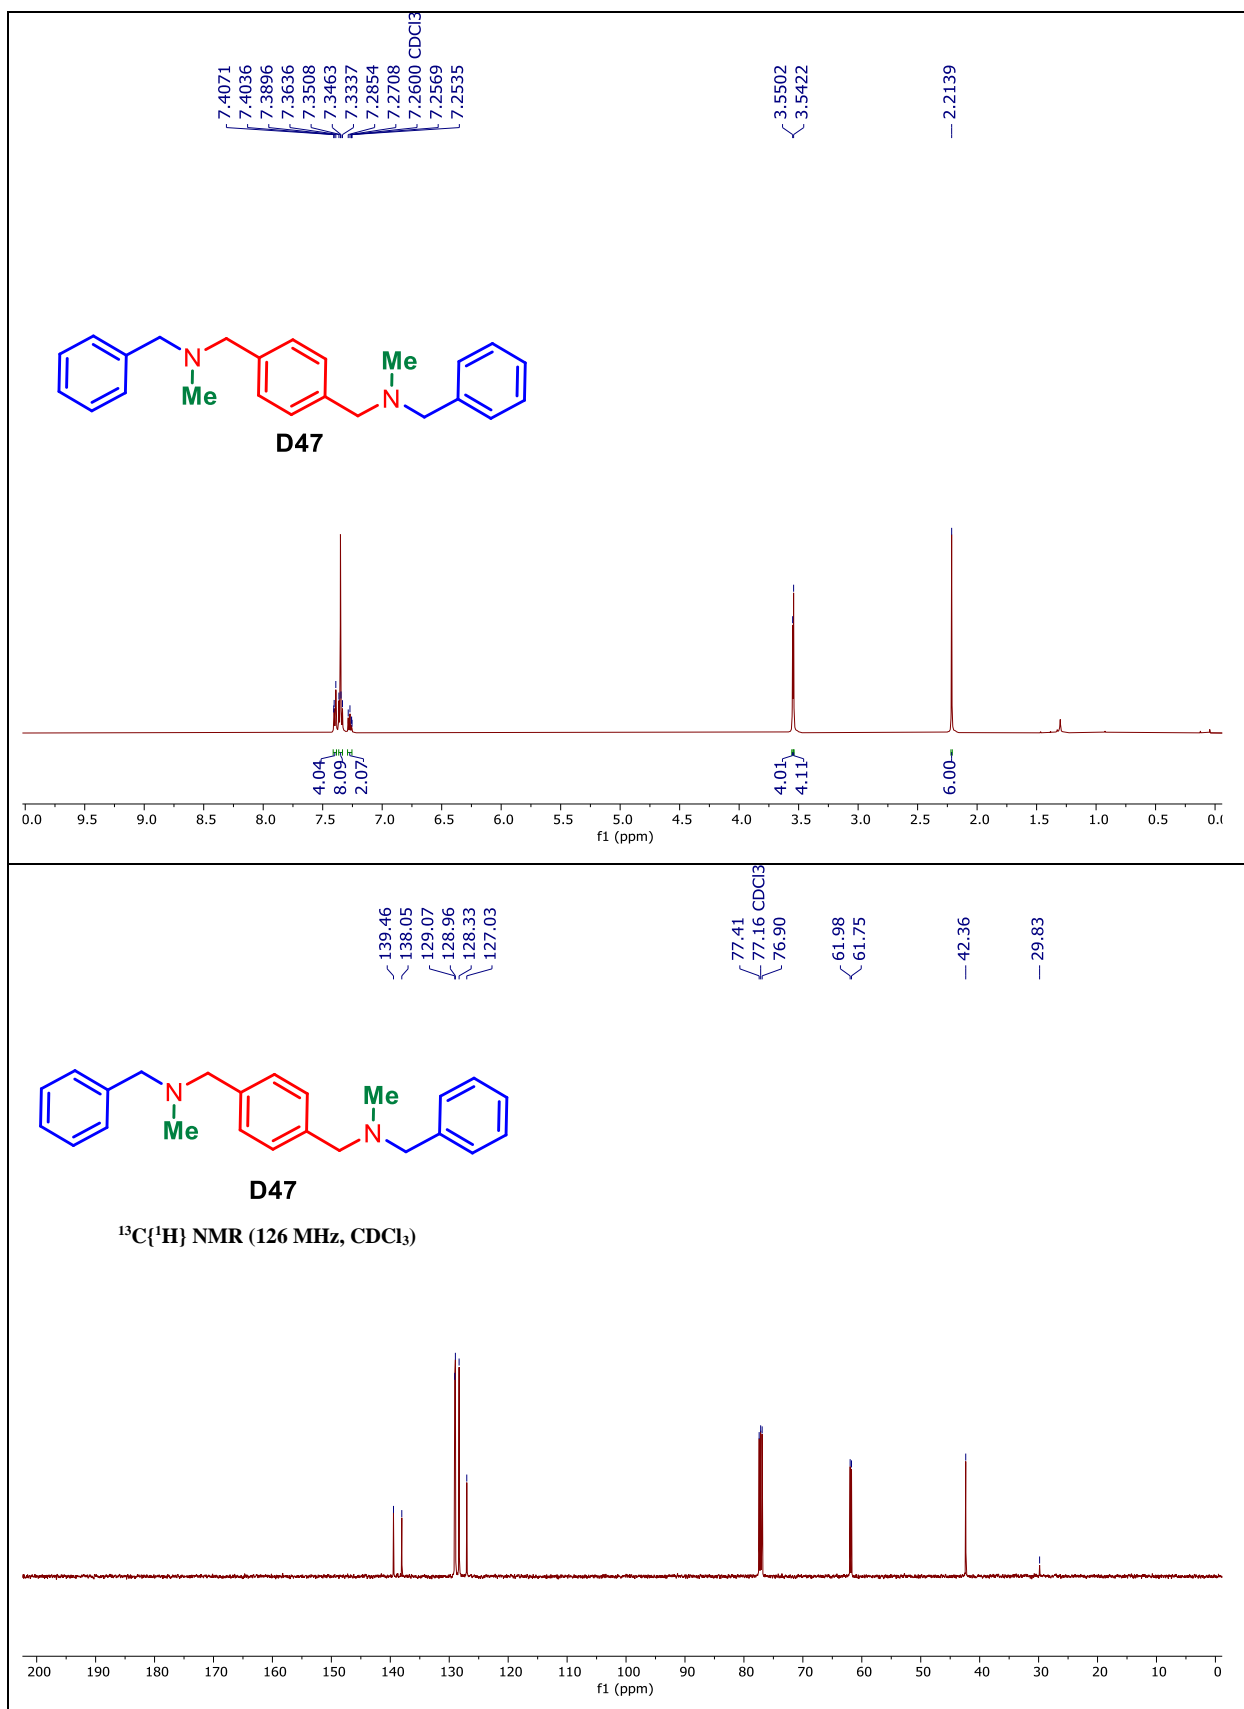

## 10.HRMS Spectra of the Newly Reported Compounds

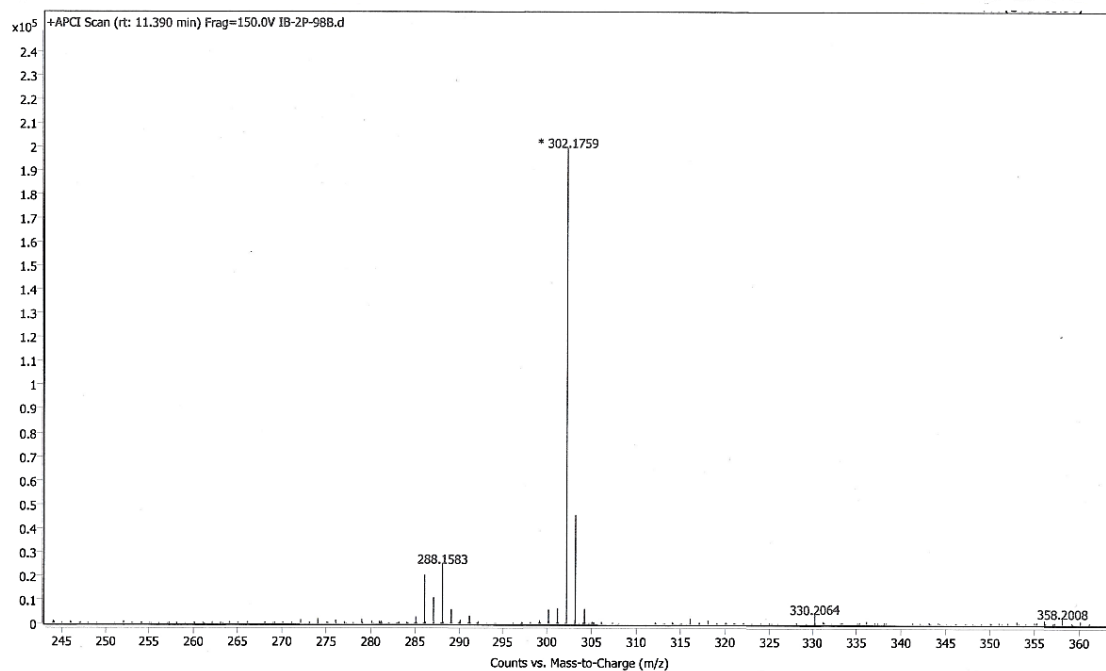

HRMS data for compound **D8**

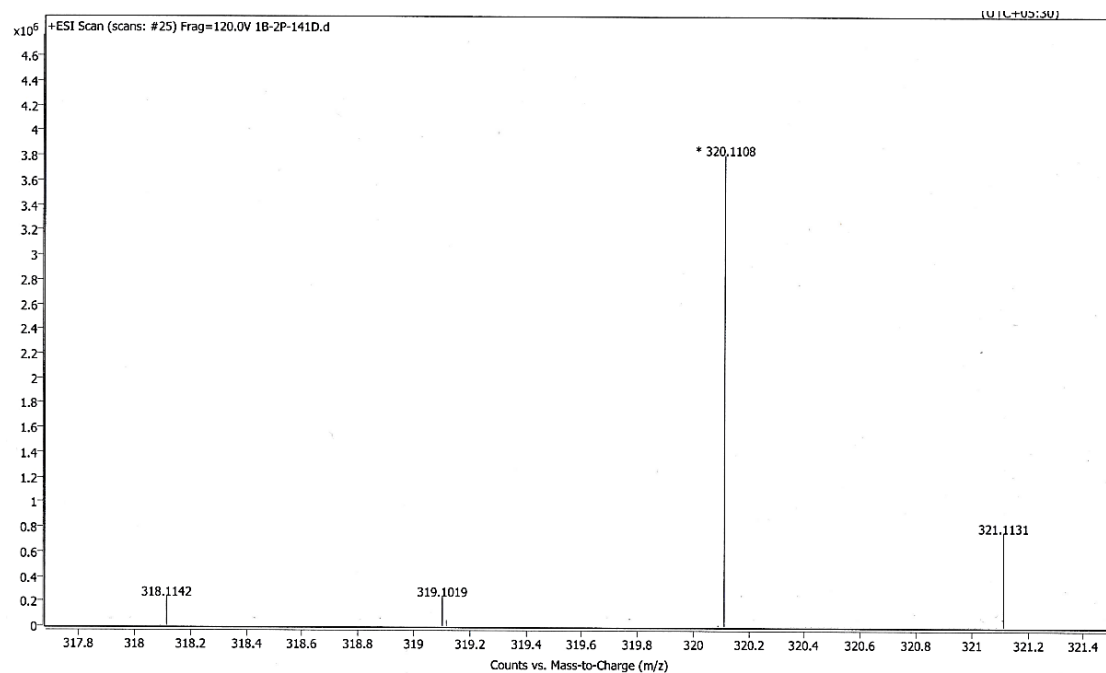

HRMS data for compound **D21**

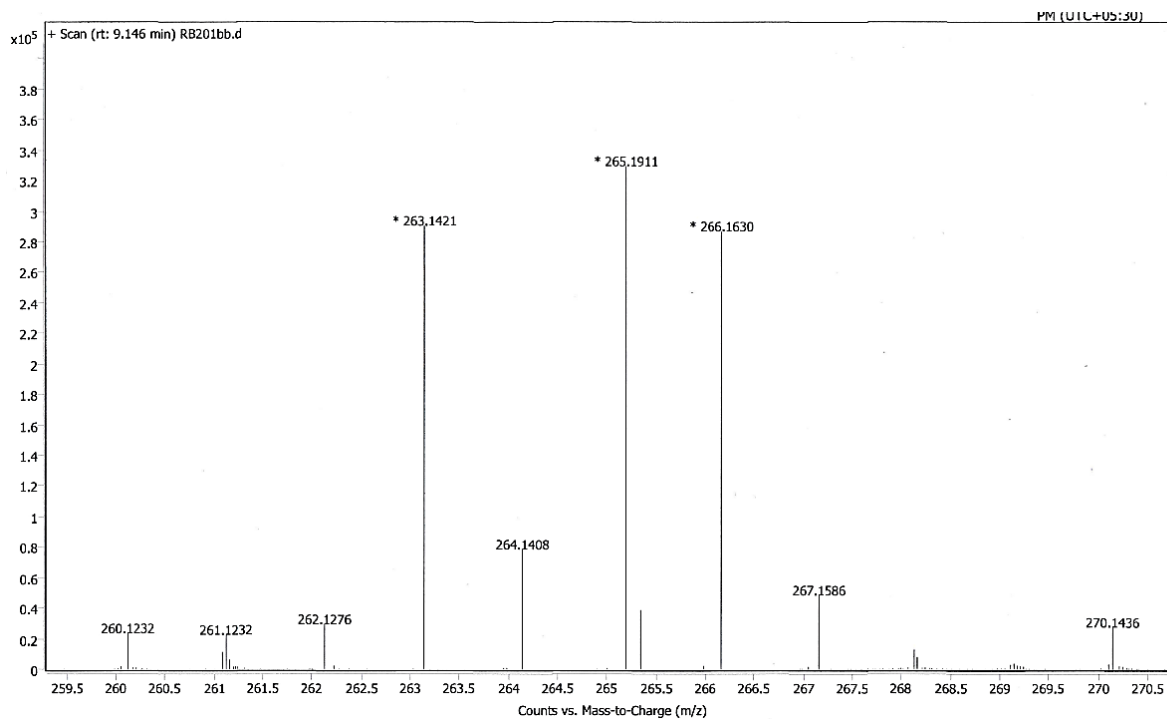

HRMS data for compound **D22**

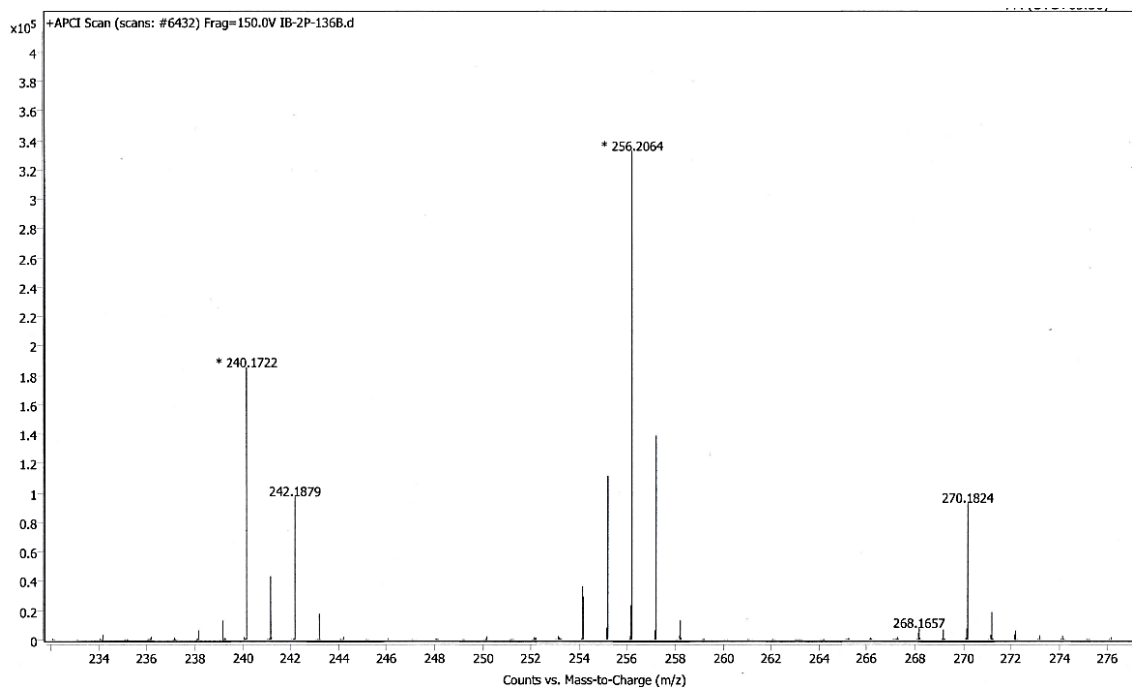

HRMS data for compound **D26**



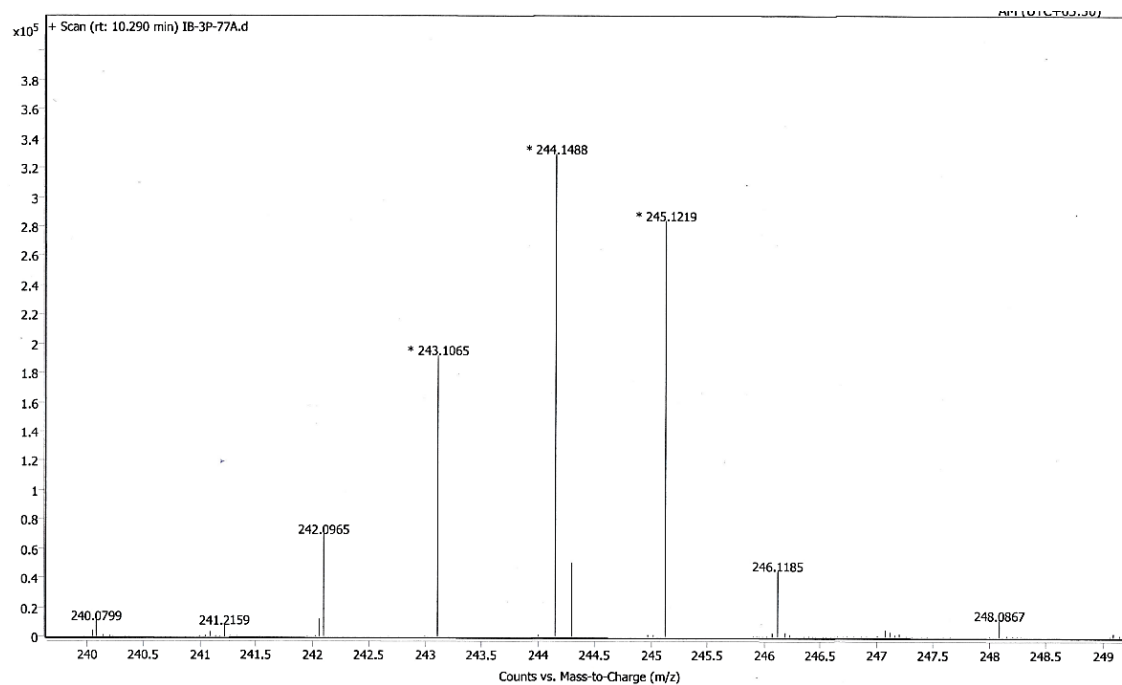

HRMS data for compound **D30**

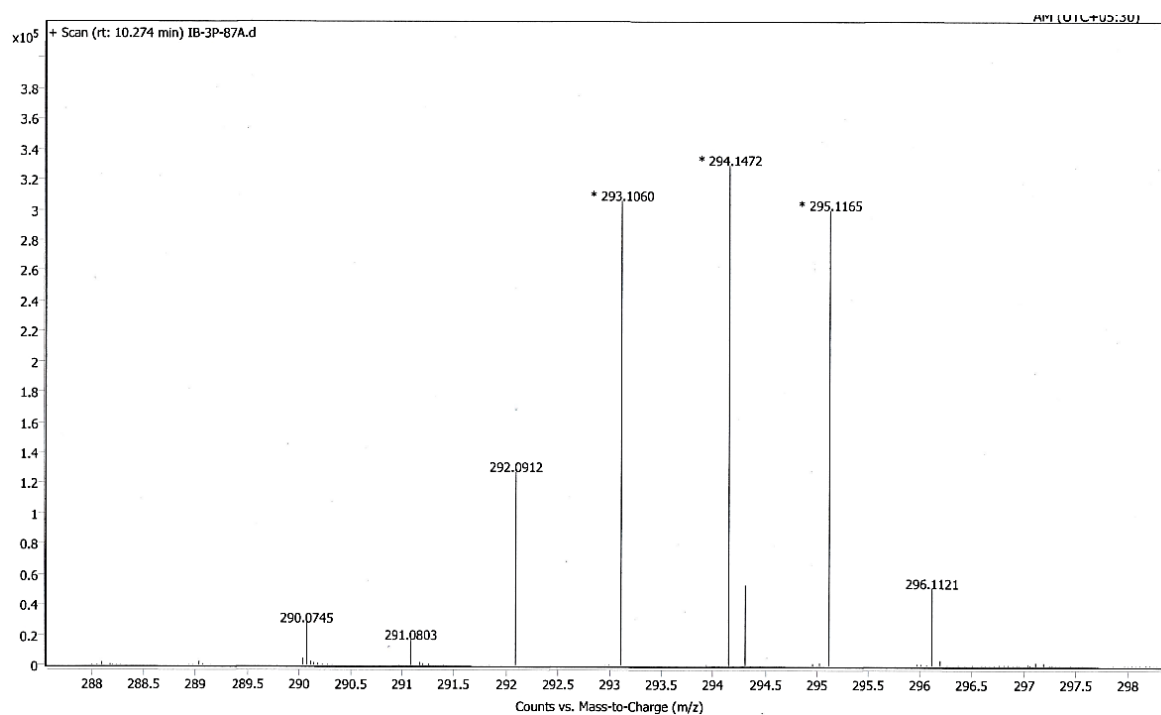

HRMS data for compound **D32**

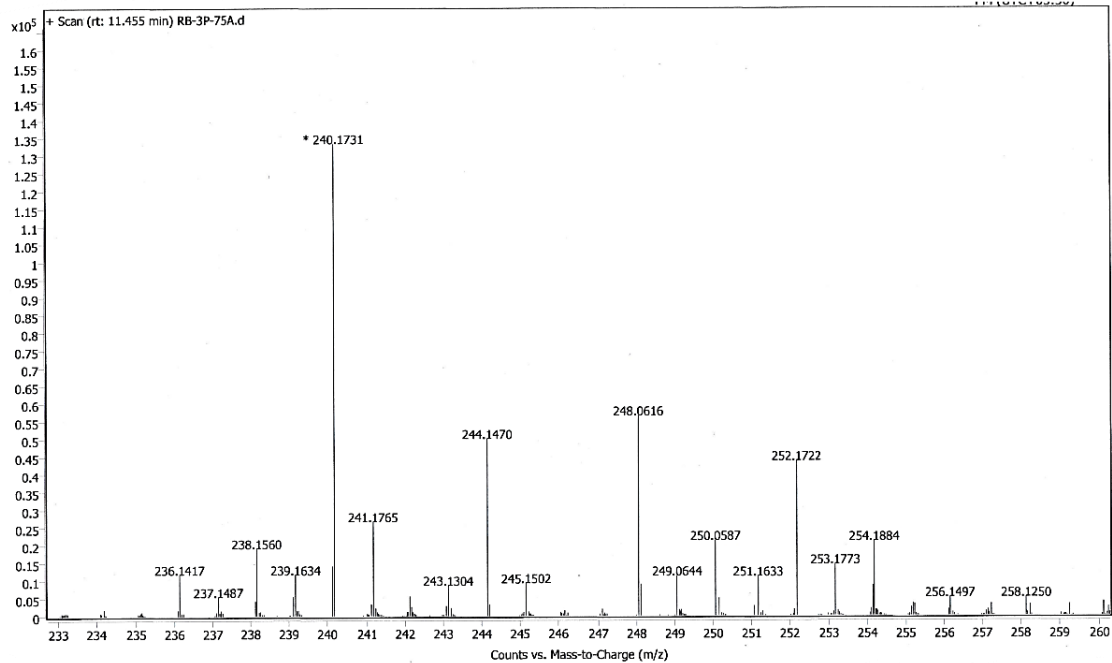

HRMS data for compound D34

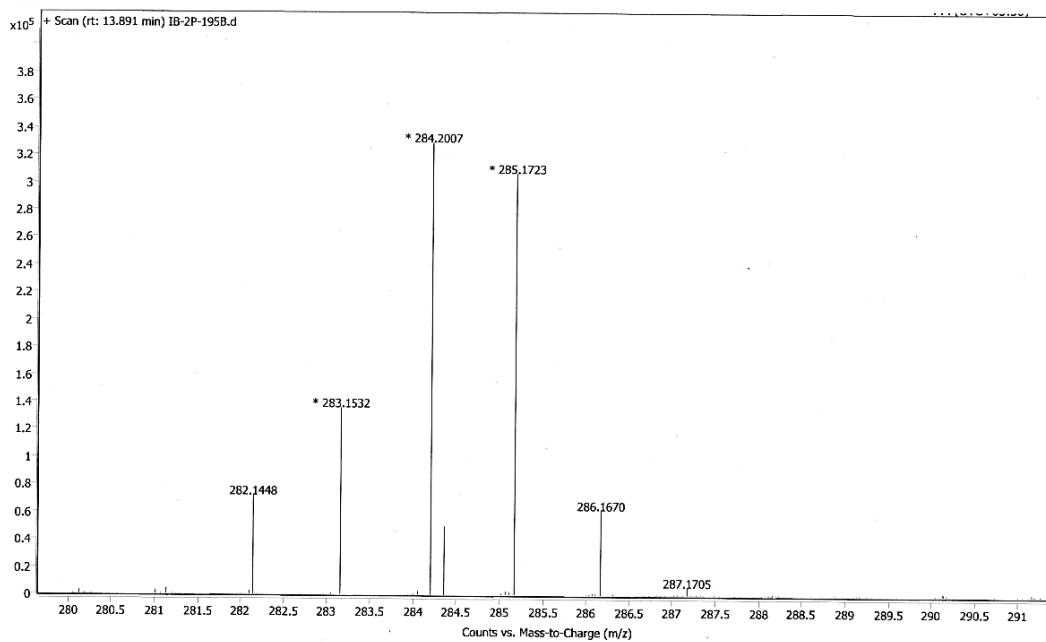

HRMS data for compound D39

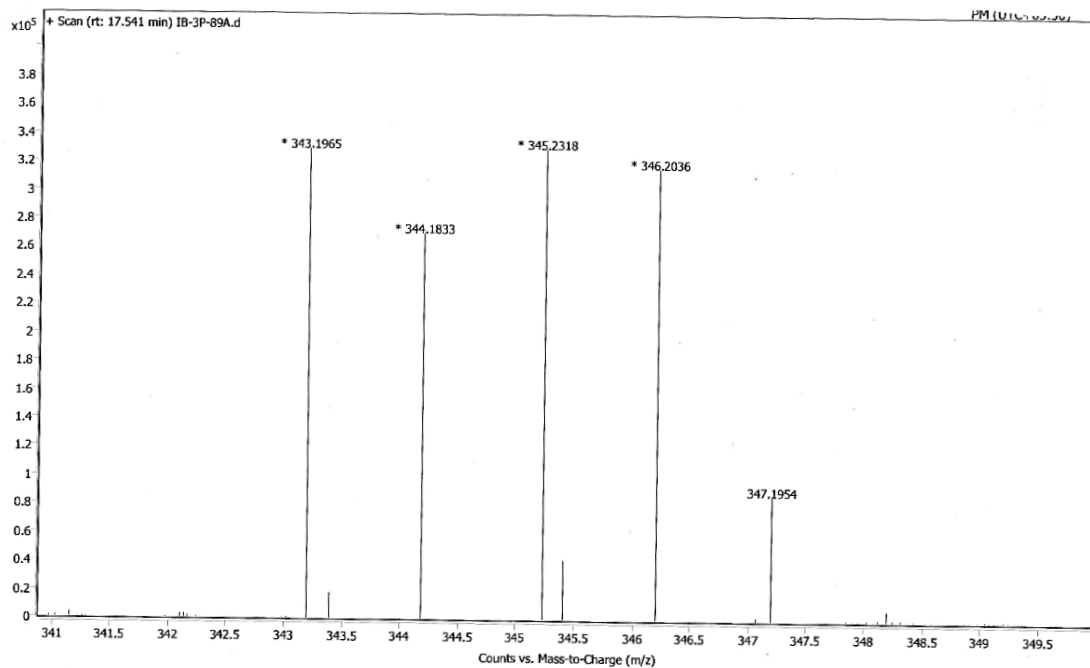

HRMS data for compound **D40**

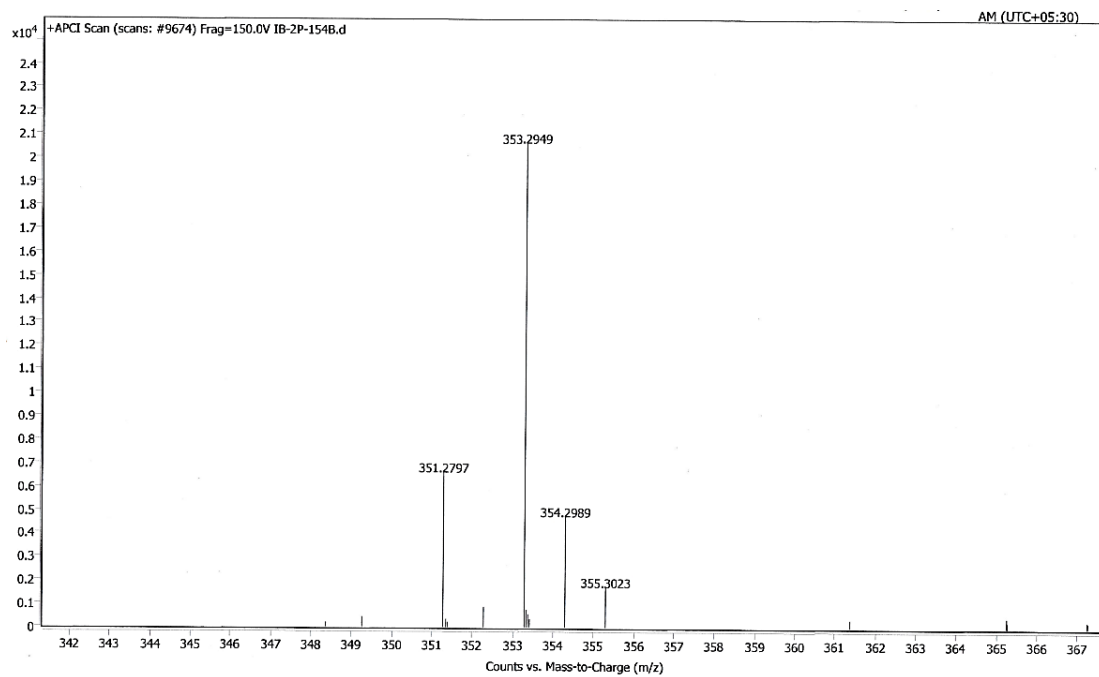

HRMS data for compound **D41**

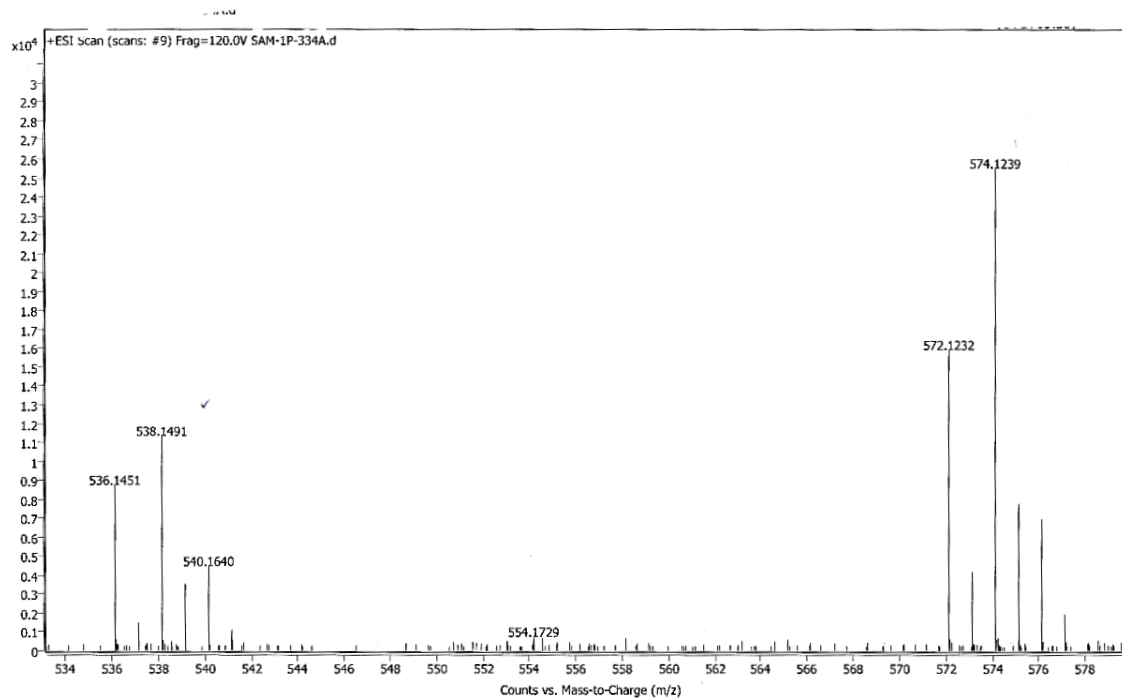

HRMS data for I-1
